# Supplementary material
Source: PubMed Central journal article supplement (PMC4558994)
Supplement: ja5b07061_si_001.pdf [file ja5b07061_si_001.pdf]

Supporting Information for  
**Enantioselective Synthesis of Carbo- and Heterocycles Through a CuH-Catalyzed  
Hydroalkylation Approach**

Yi-Ming Wang, Nicholas C. Bruno, Ángel L. Placeres, Shaolin Zhu, and Stephen L.  
Buchwald\*

*Department of Chemistry, Massachusetts Institute of Technology,*

*Cambridge, Massachusetts 02139, United States*

***Table of Contents***

|                                                                        |     |
|------------------------------------------------------------------------|-----|
| General Information .....                                              | S2  |
| General Procedure A (Hydroalkylation) .....                            | S3  |
| Characterization Data for Hydroalkylation Products .....               | S4  |
| Experimental Procedures and Characterization Data for Substrates ..... | S15 |
| References for the Supporting Information .....                        | S28 |
| NMR Spectra .....                                                      | S29 |
| Chiral HPLC and GC Traces .....                                        | S73 |

## General Information:

**General Reagent Information:** THF and CH<sub>2</sub>Cl<sub>2</sub> were dried and deoxygenated by passage through packed columns of neutral alumina and copper(II) oxide under a positive pressure of argon. Copper(II) acetate (99.999%, trace metal basis) was purchased from Sigma Aldrich and used as received. (*R*)- and (*S*)-DTBM-SEGPHOS was purchased from Takasago International Co. and Strem Chemical Co. and used as received. Tetrabutylammonium fluoride (1.0 M in THF), trimethylaluminum (2.0 M in hexanes), and diisobutylaluminum hydride (1.0 M in hexanes) were purchased from Sigma Aldrich in Sure/Seal® bottles and used as received. Dimethoxy(methyl)silane and diethoxy(methyl)silane was purchased from TCI and stored in a nitrogen-filled glove box at -20 °C. Lithium methoxide was purchased from Strem or Alfa Aesar and stored in a nitrogen-filled glove box. (*Note:* Lithium methoxide from other sources was found to exhibit poorer reactivity.) All other reagents and solvents were purchased from Oakwood, Combi-Blocks, Alfa Aesar, or Sigma Aldrich and used as received. Compounds were purified by flash column chromatography using SiliCycle *SiliaFlash*® F60 silica gel, unless otherwise indicated.

**General Analytical Information:** New compounds were characterized by <sup>1</sup>H NMR, <sup>13</sup>C NMR, and IR spectroscopy. Copies of the <sup>1</sup>H NMR and <sup>13</sup>C NMR spectra can be found at the end of the Supporting Information. <sup>1</sup>H and <sup>13</sup>C NMR spectra were recorded on a Bruker 400 MHz, Varian 500 MHz, or Bruker 600 MHz instrument. All <sup>1</sup>H NMR data are reported in δ units, parts per million (ppm), and were measured relative to the residual proton signal in the deuterated solvent at 7.26 ppm (CDCl<sub>3</sub>) or 5.32 ppm (CD<sub>2</sub>Cl<sub>2</sub>). All <sup>13</sup>C NMR spectra are <sup>1</sup>H decoupled and reported in ppm relative to the solvent signal at 77.16 ppm (CDCl<sub>3</sub>) or 53.84 ppm (CD<sub>2</sub>Cl<sub>2</sub>). IR spectra were recorded on a Thermo Scientific Nicolet iS5 spectrometer (iD5 ATR, diamond) and are reported in terms of frequency of absorption (cm<sup>-1</sup>). Melting points were measured on a Mel-Temp capillary melting point apparatus. Achiral gas chromatography (GC) analyses were performed on an Agilent 7890A gas chromatograph with an FID detector using a J & W DB-1 column. Thin-layer chromatography (TLC) was performed on Silicycle 250 μm silica gel plates. Compounds were visualized by irradiation with UV light, or stained with iodine/silica gel, potassium permanganate, or phosphomolybdic acid (PMA). Yields refer to isolated compounds, unless otherwise indicated. The enantiomeric excesses (ee) of the products were determined by high-performance liquid chromatography (HPLC) analysis performed on Agilent 1200 Series chromatographs using a chiral column (25 cm) as noted for each compound or by GC on an Agilent 6850 gas chromatograph with an FID detector using a CP-Chirasil-Dex CB column. Copies of chiral HPLC and GC traces can be found at the end of the Supporting Information. Elemental analyses were performed by Atlantic Microlabs Inc., Norcross, GA. High resolution mass spectra were obtained from on a Bruker Daltonics APEXIV 4.7 Tesla Fourier transform ion cyclotron resonance mass spectrometer (FT-ICR-MS).

### General Procedure A for the Hydroalkylation of Halide-Tethered Styrenes:

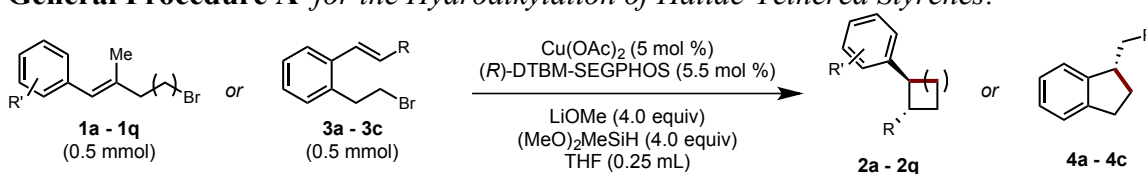

*Preparation of the copper hydride solution:* In a nitrogen-filled glove box, an oven-dried 4 mL vial equipped with a magnetic stir bar was charged with  $\text{Cu}(\text{OAc})_2$  (4.5 mg, 0.025 mmol, 5 mol%), (*R*)-DTBM-SEGPHOS (33 mg, 0.028 mmol, 5.5 mol %), and THF (0.25 mL). The vial was capped and stirred until a homogeneous, dark green solution was obtained (~10 min). Then, (dimethoxy)methylsilane (250  $\mu\text{L}$ , 2.0 mmol, 4.0 equiv) was added, the vial was recapped, and the reaction mixture was stirred until a vibrant orange solution of  $\text{L}^*\text{CuH}$  was obtained (~5 min).

*Hydroalkylation:* A flame-dried screw-cap reaction tube (16 mm  $\times$  125 mm, Fisherbrand 14-959-35A) equipped with a magnetic stir bar (1/2"  $\times$  5/16", cylindrical, no pivot ring) was capped with a Teflon/silicone septum (Thermo/National B7995-15) screw cap and flame dried under vacuum. The reaction tube was cooled under argon, charged with hydroalkylation substrate (0.5 mmol, 1.0 equiv), and recapped. The reaction tube was placed under vacuum for 5 min and transferred into the glove box. LiOMe (76 mg, 2.0 mmol, 4.0 equiv) and the prepared  $\text{L}^*\text{CuH}$  solution were added in rapid succession, and the reaction tube was capped using a new septum and removed from the glove box. The reaction tube was placed in an oil bath, preheated to 55  $^\circ\text{C}$ , where it was stirred for 18 to 36 h at 750 rpm. (*Notes:* For consistent reactivity, powdery LiOMe should be used, with vigorous, but even stirring maintained during the course of the reaction. For certain substrates, reaction temperature was found to strongly affect the outcome and should therefore be carefully monitored). After completion of the reaction, as indicated by the reaction mixture becoming dark brown-black, the reaction mixture was allowed to cool to room temperature, diluted with  $\text{CH}_2\text{Cl}_2$  (5 mL), and filtered through a plug of silica gel, eluting with  $\text{CH}_2\text{Cl}_2$ . The crude mixture was concentrated in vacuo and purified by flash column chromatography (100 g silica gel for 0.5 mmol of substrate) to provide the desired product. Yields reported are the average isolated yields on two runs.

### Characterization data for hydroalkylation products (2a – 2r, 4a – 4c):

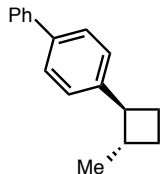

**4-((1S,2S)-2-Methylcyclobutyl)-1,1'-biphenyl (2a):** Prepared following general procedure A using (*E*)-4-(4-bromo-2-methylbut-1-en-1-yl)-1,1'-biphenyl (**1a**, 150 mg, 0.5 mmol, 1.0 equiv). The reaction mixture was quenched after 36 h, and the crude residue was purified by flash column chromatography, eluting with a gradient of 0 to 2% Et<sub>2</sub>O in pentane to provide the title compound as a colorless solid, **m.p.** 50–52 °C. **Yield:** 92 mg, 83%. **<sup>1</sup>H NMR** (600 MHz, CDCl<sub>3</sub>) δ 7.64 – 7.52 (m, 4H), 7.49 – 7.40 (m, 2H), 7.38 – 7.28 (m, 3H), 3.09 – 3.00 (m, 1H), 2.50 – 2.39 (m, 1H), 2.29 – 2.20 (m, 1H), 2.12 – 1.98 (m, 2H), 1.67 – 1.56 (m, 1H), 1.18 (d, *J* = 6.5 Hz, 3H). **<sup>13</sup>C NMR** (151 MHz, CDCl<sub>3</sub>) δ 144.5, 141.3, 138.9, 128.9, 127.2, 127.1 (2 resonances), 48.4, 39.6, 26.7, 25.9, 21.2. **IR** (thin film) 2948, 2862, 1486, 1448, 1008, 833, 759, 731, 696 cm<sup>-1</sup>. **EA** Calcd. for C<sub>17</sub>H<sub>18</sub>: C, 91.84; H, 8.16. Found: C, 91.55; H, 8.11. **Specific rotation** [α]<sub>D</sub><sup>24</sup> = +74.8 (*c* = 1.0, CHCl<sub>3</sub>). HPLC analysis (OJ column, 99:1 hexanes/ethanol, 0.7 mL/min, *t*<sub>m</sub> = 57.4 min, *t*<sub>M</sub> = 49.6 min) indicated **99% ee**.

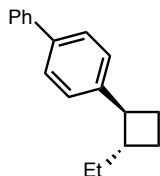

**4-((1S,2S)-2-Ethylcyclobutyl)-1,1'-biphenyl (2b):** Prepared following general procedure A using (*E*)-4-(4-bromo-2-ethylbut-1-en-1-yl)-1,1'-biphenyl (**1b**, 158 mg, 0.5 mmol, 1.0 equiv). The reaction mixture was quenched after 36 h, and the crude residue was purified by flash column chromatography, eluting with a gradient of 0 – 2% Et<sub>2</sub>O in pentane to provide the title compound as a colorless oil. **Yield:** 97 mg, 82%. **<sup>1</sup>H NMR** (600 MHz, CDCl<sub>3</sub>) δ 7.61 – 7.56 (m, 2H), 7.56 – 7.50 (m, 2H), 7.45 – 7.39 (m, 2H), 7.35 – 7.28 (m, 3H), 3.13 – 3.04 (m, 1H), 2.37 – 2.27 (m, 1H), 2.27 – 2.20 (m, 1H), 2.09 – 1.94 (m, 2H), 1.69 – 1.54 (m, 2H), 1.51 – 1.40 (m, 1H), 0.83 (t, *J* = 7.4 Hz, 3H). **<sup>13</sup>C NMR** (151 MHz, CDCl<sub>3</sub>) δ 144.9, 141.3, 138.9, 128.8, 127.3, 127.2, 127.1, 46.7, 46.0, 29.4, 26.1, 24.5, 11.5. **IR** (thin film) 1485, 834, 755, 729, 695 cm<sup>-1</sup>. **EA** Calcd. for C<sub>18</sub>H<sub>20</sub>: C, 91.47; H, 8.53. Found: C, 91.21; H, 8.43. **Specific rotation** [α]<sub>D</sub><sup>24</sup> = +52.2 (*c* = 1.0, CHCl<sub>3</sub>). HPLC analysis (AD-H column, 99.5:0.5 pentane/isopropanol, 0.8 mL/min, *t*<sub>m</sub> = 13.0 min, *t*<sub>M</sub> = 10.1 min) indicated **98% ee**.

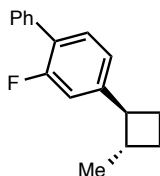

**2-Fluoro-4-((1S,2S)-2-methylcyclobutyl)-1,1'-biphenyl (2c):** Prepared following general procedure A using (*E*)-4-(4-bromo-2-methylbut-1-en-1-yl)-2-fluoro-1,1'-biphenyl

(**1c**, 160 mg, 0.5 mmol, 1.0 equiv). The reaction mixture was quenched after 24 h, and the crude residue was purified by flash column chromatography, eluting with a gradient of 0 – 2% Et<sub>2</sub>O in pentane to provide the title compound as a colorless oil. **Yield:** 105 mg, 87%. **<sup>1</sup>H NMR** (600 MHz, CDCl<sub>3</sub>) δ 7.59 – 7.51 (m, 2H), 7.49 – 7.41 (m, 2H), 7.40 – 7.33 (m, 2H), 7.11 – 6.98 (m, 2H), 3.08 – 2.95 (m, 1H), 2.48 – 2.37 (m, 1H), 2.29 – 2.19 (m, 1H), 2.13 – 1.94 (m, 2H), 1.67 – 1.55 (m, 1H), 1.18 (d, *J* = 6.6 Hz, 3H). **<sup>13</sup>C NMR** (151 MHz, CDCl<sub>3</sub>) δ 159.9 (d, *J*<sub>CF</sub> = 247 Hz), 147.2 (d, *J*<sub>CF</sub> = 7.3 Hz), 136.1, 130.5 (d, *J*<sub>CF</sub> = 3.9 Hz), 129.1 (d, *J*<sub>CF</sub> = 2.8 Hz), 128.5, 127.5, 126.5 (d, *J*<sub>CF</sub> = 13.7 Hz), 122.6 (d, *J*<sub>CF</sub> = 3.0 Hz), 114.2 (d, *J*<sub>CF</sub> = 22.5 Hz), 48.2, 39.5, 26.6, 25.8, 21.1. **IR** (thin film) 1483, 1413, 1129, 866, 826, 764, 722, 695 cm<sup>-1</sup>. **EA** Calcd. for C<sub>17</sub>H<sub>17</sub>F: C, 84.96; H, 7.13. Found: C, 84.67; H, 7.29. **Specific rotation** [ $\alpha$ ]<sub>D</sub><sup>24</sup> = +69.9 (*c* = 1.0, CHCl<sub>3</sub>). HPLC analysis (OJ then OJ-H then OJ columns in series, 99.5:0.5 pentane/ethanol, 0.5 mL/min, *t*<sub>m</sub> = 52.8 min, *t*<sub>M</sub> = 54.4 min) indicated **99% ee**.

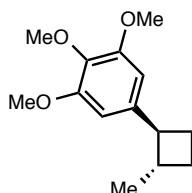

**1,2,3-Trimethoxy-5-((1S,2S)-2-methylcyclobutyl)benzene (2d):** Prepared following general procedure **A** using (*E*)-5-(4-bromo-2-methylbut-1-en-1-yl)-1,2,3-trimethoxybenzene (**1d**, 160 mg, 0.5 mmol, 1.0 equiv). The reaction mixture was quenched after 30 h, and the crude residue was purified by flash column chromatography, eluting with 5% EtOAc in hexanes to provide the title compound as a colorless oil. **Yield:** 55 mg, 47%. **<sup>1</sup>H NMR** (600 MHz, CDCl<sub>3</sub>) δ 6.43 (s, 2H), 3.87 (s, 6H), 3.83 (s, 3H), 2.96 – 2.85 (m, 1H), 2.42 – 2.30 (m, 1H), 2.24 – 2.13 (m, 1H), 2.07 – 1.88 (m, 2H), 1.58 – 1.48 (m, 1H), 1.14 (d, *J* = 6.5 Hz, 3H). **<sup>13</sup>C NMR** (151 MHz, CDCl<sub>3</sub>) δ 153.2, 141.2, 136.2, 103.5, 61.0, 56.2, 49.1, 39.5, 26.4, 26.1, 21.1. **IR** (thin film) 1585, 1506, 1451, 1416, 1237, 1127, 1013 cm<sup>-1</sup>. **EA** Calcd. for C<sub>14</sub>H<sub>20</sub>O<sub>3</sub>: C, 71.16; H, 8.53. Found: C, 71.29; H, 8.40. **Specific rotation** [ $\alpha$ ]<sub>D</sub><sup>24</sup> = +55.1 (*c* = 1.0, CHCl<sub>3</sub>). HPLC analysis (OD-H column, 98:2 hexanes/isopropanol, 0.5 mL/min, *t*<sub>m</sub> = 15.0 min, *t*<sub>M</sub> = 15.7 min) indicated **97% ee**.

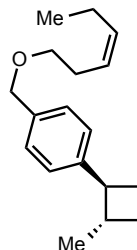

**1-(((Z)-Hex-3-en-1-yl)oxy)methyl-4-((1S,2S)-2-methylcyclobutyl)benzene (2e):** Prepared following general procedure **A** using 1-((*E*)-4-bromo-2-methylbut-1-en-1-yl)-4-(((Z)-hex-3-en-1-yl)oxy)methyl)benzene (**1e**, 168 mg, 0.5 mmol, 1.0 equiv). The reaction mixture was quenched after 24 h, and the crude residue was purified by flash column chromatography, eluting with 2.5% MTBE in hexanes to provide the title

compound as a colorless oil. **Yield:** 89 mg, 69%.  $^1\text{H NMR}$  (400 MHz,  $\text{CDCl}_3$ )  $\delta$  7.30 (d,  $J = 8.0$  Hz, 2H), 7.22 (d,  $J = 8.0$  Hz, 2H), 5.50 (ddd,  $J = 12.6, 9.8, 7.1$  Hz, 1H), 5.39 (ddd,  $J = 10.8, 9.8, 7.1$  Hz, 1H), 4.52 (s, 2H), 3.50 (t,  $J = 7.1$  Hz, 2H), 3.05 – 2.94 (m, 1H), 2.48 – 2.32 (m, 3H), 2.28 – 2.16 (m, 1H), 2.16 – 1.93 (m, 4H), 1.67 – 1.54 (m, 1H), 1.16 (d,  $J = 6.6$  Hz, 3H), 1.00 (t,  $J = 7.5$  Hz, 3H).  $^{13}\text{C NMR}$  (101 MHz,  $\text{CDCl}_3$ )  $\delta$  144.7, 136.1, 133.7, 127.8, 126.6, 125.0, 72.9, 70.1, 48.5, 39.5, 28.0, 26.7, 25.8, 21.1, 20.8, 14.4. **IR** (thin film) 2959, 2861, 1452, 1358, 1095, 1020, 815, 731  $\text{cm}^{-1}$ . **HRMS** ( $m/z$ , DART-TOF, +ve) Calcd. for  $[\text{C}_{18}\text{H}_{26}\text{O} + \text{NH}_4]^+$ : 276.2322. Found: 276.2316. **Specific rotation**  $[\alpha]_{\text{D}}^{24} = +41.9$  ( $c = 1.0$ ,  $\text{CHCl}_3$ ). HPLC analysis (IC column, 98:2 hexanes/isopropanol, 0.8 mL/min,  $t_{\text{m}} = 5.9$  min,  $t_{\text{M}} = 5.5$  min) indicated **97% ee**.

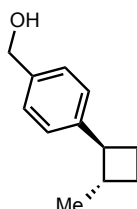

**(3-((1S,2S)-2-Methylcyclobutyl)phenyl)methanol (2f):** Prepared following general procedure **A** with changes as noted below. (*E*)-(3-(4-bromo-2-methylbut-1-en-1-yl)phenyl)methanol (**1f**, 128 mg, 0.5 mmol, 1.0 equiv), 4.8 equiv. dimethoxy(methyl)silane (300  $\mu\text{L}$ , 2.4 mmol) and 0.20 mL THF were used. The reaction mixture was stirred for 10 min at room temperature before the reaction tube was transferred to an oil bath at 55  $^{\circ}\text{C}$  and stirred for 24 h. After the reaction mixture was diluted with dichloromethane, a saturated solution of ammonium fluoride in methanol (2 mL) was added dropwise, and the reaction mixture was stirred for 5 min. The crude residue was filtered through a plug of  $\text{SiO}_2$  (dichloromethane), carefully concentrated (volatile), and purified by flash column chromatography, eluting with a gradient of 25% to 33%  $\text{Et}_2\text{O}$  in pentane to provide the title compound as a colorless oil. **Yield:** 60 mg, 68%.  $^1\text{H NMR}$  (400 MHz,  $\text{CDCl}_3$ )  $\delta$  7.38 – 7.15 (m, 4H), 4.72 (s, 2H), 3.08 – 2.96 (m, 1H), 2.51 – 2.36 (m, 1H), 2.31 – 2.16 (m, 1H), 2.12 – 1.95 (m, 2H), 1.74 – 1.51 (m, 2H), 1.18 (d,  $J = 6.6$  Hz, 3H).  $^{13}\text{C NMR}$  (101 MHz,  $\text{CDCl}_3$ )  $\delta$  145.8, 140.9, 128.6, 126.1, 125.4, 124.7, 65.7, 48.7, 39.4, 26.7, 25.9, 21.1. **IR** (thin film) 3336, 2949, 2862, 1451, 1020, 798, 780, 700  $\text{cm}^{-1}$ . **EA** Calcd. for  $\text{C}_{12}\text{H}_{16}\text{O}$ : C, 81.77; H, 9.15. Found: C, 81.49; H, 9.36. **Specific rotation**  $[\alpha]_{\text{D}}^{24} = +34.6$  ( $c = 0.4$ ,  $\text{CHCl}_3$ ). HPLC analysis (OD-H column, 95:5 hexanes/isopropanol, 0.8 mL/min,  $t_{\text{m}} = 12.5$  min,  $t_{\text{M}} = 11.0$  min) indicated **97% ee**.

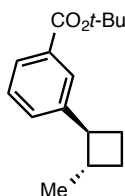

**tert-Butyl 3-((1S,2S)-2-methylcyclobutyl)benzoate (2g):** Prepared following general procedure **A** was using *tert*-butyl (*E*)-4-(4-bromo-2-methylbut-1-en-1-yl)benzoate (**1g**, 163 mg, 0.5 mmol, 1.0 equiv). The reaction mixture was quenched after 24 h, and the crude residue was purified by flash column chromatography, eluting with a gradient of

2.5 to 5% Et<sub>2</sub>O in pentane to provide the title compound as a colorless oil. **Yield:** 91 mg, 74%. <sup>1</sup>H NMR (400 MHz, CDCl<sub>3</sub>) δ 7.86 – 7.76 (m, 2H), 7.39 – 7.29 (m, 2H), 3.06 – 2.95 (m, 1H), 2.49 – 2.33 (m, 1H), 2.29 – 2.14 (m, 1H), 2.11 – 1.91 (m, 2H), 1.70 – 1.52 (m, 10H), 1.15 (d, *J* = 6.6 Hz, 3H). <sup>13</sup>C NMR (126 MHz, CDCl<sub>3</sub>) δ 166.2, 145.5, 132.0, 130.9, 128.2, 127.6, 127.1, 81.0, 48.4, 39.4, 28.3, 26.7, 25.9, 21.1. **IR** (thin film) 2971, 1713, 1368, 1295, 1257, 1162, 1111, 753 cm<sup>-1</sup>. **EA** Calcd. for C<sub>16</sub>H<sub>22</sub>O<sub>2</sub>: C, 78.01; H, 9.00. Found: C, 77.78; H, 8.91. **Specific rotation** [ $\alpha$ ]<sub>D</sub><sup>24</sup> = +51.3 (*c* = 1.0, CHCl<sub>3</sub>).

To determine the enantiomeric excess, the corresponding benzyl alcohol was prepared. An aliquot (20 mg, 0.081 mmol, 1.0 equiv) of the desired product in CH<sub>2</sub>Cl<sub>2</sub> (5 mL) was treated with DIBAL-H (25 wt. % in toluene) (0.5 mL, large excess) at room temperature. The reaction mixture was stirred for 5 min before a saturated aqueous solution of Na<sub>2</sub>SO<sub>4</sub> (1 mL) was carefully added, and the reaction mixture was stirred for an additional 10 min. The solid precipitate was removed by filtration through a medium porosity sintered funnel, and the filtrate was concentrated and purified by preparative thin layer chromatography (5:1 hexanes/EtOAc) to afford benzyl alcohol **2f** (7.0 mg, 49% yield). HPLC analysis (OD-H column, 95:5 hexanes/isopropanol, 0.8 mL/min, *t*<sub>m</sub> = 12.5 min, *t*<sub>M</sub> = 11.0 min) indicated **98% ee**.

**4.0 mmol-scale synthesis of 2g:** In a nitrogen-filled glove box, an oven-dried 20 mL vial was charged with Cu(OAc)<sub>2</sub> (36.3 mg, 0.20 mmol, 0.05 equiv) and (*R*)-DTBM-SEGPHOS (260 mg, 0.22 mmol, 0.055 equiv) and THF (1.0 mL). The vial was capped, and the suspension was stirred until a homogeneous forest-green solution was obtained (~15 min). Dimethoxy(methyl)silane (2.0 mL, 16.2 mmol, 4.05 equiv) was added, the vial was recapped, and the reaction mixture was stirred until a vibrant orange solution of L\*CuH was obtained (~5 min). Meanwhile, an oven-dried thick-walled reaction tube (14 mL, Ace 8648-124) equipped with a Teflon plug and stir bar (3/8" × 3/16", cylindrical, no pivot ring) was cooled in a desiccator and charged with **1g** (1.30 g, 4.0 mmol, 1.0 equiv). The reaction tube was transferred into the glove box, and LiOMe (608 mg, 16 mmol, 4.0 equiv) and the prepared L\*CuH solution were added in rapid succession. The reaction tube was sealed with the Teflon plug and transferred out of the glove box. The reaction mixture was stirred in an oil bath preheated to 55 °C for 36 h at 1000 rpm. Subsequently, the reaction tube was allowed to cool to room temperature, and the reaction mixture was filtered through a plug of SiO<sub>2</sub> gel (CH<sub>2</sub>Cl<sub>2</sub>) and concentrated to afford the crude product, which was purified by flash column chromatography (pentane to 5% Et<sub>2</sub>O in pentane) to provide the title compound. **Yield:** 764 mg, 78%. HPLC analysis on the corresponding benzyl alcohol indicated **98% ee**.

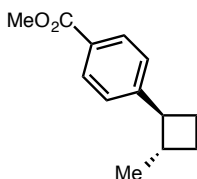

**Methyl 4-((1S,2S)-2-methylcyclobutyl)benzoate (2h):** Prepared following general procedure **A** with changes as noted below. Methyl (*E*)-4-(4-bromo-2-methylbut-1-en-1-yl)benzoate (**1h**, 142 mg, 0.5 mmol, 1.0 equiv), 2.4 equiv dimethoxy(methyl)silane (150  $\mu$ L, 1.2 mmol), and 0.35 mL THF were used. The reaction mixture was quenched after 24 h, and the crude residue was purified by flash column chromatography, eluting with 5% Et<sub>2</sub>O in pentane to provide the title compound as a colorless oil. **Yield:** 60 mg, 59%.

**<sup>1</sup>H NMR** (600 MHz, CDCl<sub>3</sub>) δ 7.96 (d, *J* = 7.8 Hz, 2H), 7.27 (d, *J* = 7.7 Hz, 2H), 3.90 (s, 3H), 3.10 – 2.95 (m, 1H), 2.47 – 2.33 (m, 1H), 2.31 – 2.15 (m, 1H), 2.10 – 1.91 (m, 2H), 1.65 – 1.54 (m, 1H), 1.15 (d, *J* = 6.4 Hz, 3H). **<sup>13</sup>C NMR** (151 MHz, CDCl<sub>3</sub>) δ 167.3, 150.8, 129.8, 127.8, 126.6, 52.1, 48.6, 39.4, 26.7, 25.6, 21.1. **IR** (thin film) 2949, 1720, 1610, 1435, 1275, 1177, 1110, 1019, 704 cm<sup>-1</sup>. **EA** Calcd. for C<sub>13</sub>H<sub>16</sub>O<sub>2</sub>: C, 76.44; H, 7.90. Found: C, 76.69; H, 8.06. **Specific rotation** [α]<sub>D</sub><sup>24</sup> = +68.7 (*c* = 0.4, CHCl<sub>3</sub>). HPLC analysis (AD-H column, 95:5 hexanes/isopropanol, 0.8 mL/min, *t*<sub>m</sub> = 7.7 min, *t*<sub>M</sub> = 7.4 min) indicated **98% ee**.

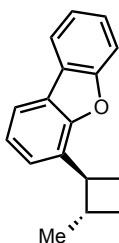

**4-((1S,2S)-2-Methylcyclobutyl)dibenzo[*b,d*]furan (2i):** Prepared following general procedure A using (*E*)-4-(4-bromo-2-methylbut-1-en-1-yl)dibenzo[*b,d*]furan (**1i**, 158 mg, 0.5 mmol, 1.0 equiv). The reaction mixture was quenched after 36 h, and the crude residue was purified by flash column chromatography, eluting with pentane to provide the title compound as a colorless oil. **Yield:** 103 mg, 87%. **<sup>1</sup>H NMR** (600 MHz, CDCl<sub>3</sub>) δ 7.95 (d, *J* = 7.6 Hz, 1H), 7.79 (d, *J* = 7.5 Hz, 1H), 7.59 (d, *J* = 8.2 Hz, 1H), 7.50 – 7.42 (m, 1H), 7.40 – 7.29 (m, 3H), 3.62 – 3.50 (m, 1H), 2.78 – 2.64 (m, 1H), 2.45 – 2.33 (m, 1H), 2.29 – 2.11 (m, 2H), 1.77 – 1.66 (m, 1H), 1.26 (d, *J* = 6.5 Hz, 3H). **<sup>13</sup>C NMR** (151 MHz, CDCl<sub>3</sub>) δ 156.2, 154.5, 129.3, 127.0, 124.9, 124.6, 123.9, 122.8, 122.6, 120.8, 118.2, 111.8, 43.3, 38.4, 27.1, 25.4, 21.3. **IR** (thin film) 2948, 1450, 1420, 1183, 843, 747 cm<sup>-1</sup>. **EA** Calcd. for C<sub>17</sub>H<sub>16</sub>O: C, 86.40; H, 6.82. Found: C, 86.17; H, 6.98. **Specific rotation** [α]<sub>D</sub><sup>24</sup> = +48.0 (*c* = 1.0, CHCl<sub>3</sub>). HPLC analysis (OJ column, 98:2 hexanes/isopropanol, 0.8 mL/min, *t*<sub>m</sub> = 6.7 min, *t*<sub>M</sub> = 6.0 min) indicated **98% ee**.

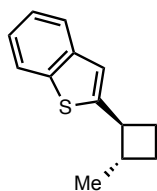

**2-((1S,2S)-2-Methylcyclobutyl)benzo[*b*]thiophene (2j):** Prepared following general procedure A using (*E*)-2-(4-bromo-2-methylbut-1-en-1-yl)benzo[*b*]thiophene (**1j**, 140 mg, 0.5 mmol, 1.0 equiv). The reaction mixture was quenched after 24 h, and the crude residue was purified by flash column chromatography, eluting with a gradient of 0 to 2% Et<sub>2</sub>O in pentane to provide the title compound as a colorless solid, **m.p.** 37–39 °C. **Yield:** 80 mg, 79%. **<sup>1</sup>H NMR** (600 MHz, CDCl<sub>3</sub>) δ 7.77 (d, *J* = 7.9 Hz, 1H), 7.67 (d, *J* = 7.8 Hz, 1H), 7.34 – 7.28 (m, 1H), 7.28 – 7.22 (m, 1H), 7.00 (s, 1H), 3.28 – 3.18 (m, 1H), 2.56 – 2.42 (m, 1H), 2.38 – 2.28 (m, 1H), 2.16 – 2.03 (m, 2H), 1.67 – 1.55 (m, 1H), 1.18 (d, *J* = 6.5 Hz, 3H). **<sup>13</sup>C NMR** (151 MHz, CDCl<sub>3</sub>) δ 150.5, 140.3, 139.2, 124.2, 123.5, 122.9, 122.4, 118.7, 44.6, 41.0, 27.3, 26.7, 20.7. **IR** (thin film) 2947, 1457, 1436, 819, 742, 577 cm<sup>-1</sup>. **EA** Calcd. for C<sub>13</sub>H<sub>14</sub>S: C, 77.18; H, 6.98. Found: C, 77.08; H, 6.85. **Specific**



**rotation**  $[\alpha]_{\text{D}}^{24} = +95.6$  ( $c = 0.8$ ,  $\text{CHCl}_3$ ). HPLC analysis (OJ-H column, pentane, 0.8 mL/min,  $t_{\text{m}} = 25.2$  min,  $t_{\text{M}} = 27.1$  min) indicated **99% ee**.

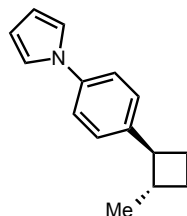

**1-(4-((1S,2S)-2-Methylcyclobutyl)phenyl)-1H-pyrrole (2k):** Prepared following general procedure A using (*E*)-1-(4-(4-bromo-2-methylbut-1-en-1-yl)phenyl)-1H-pyrrole (**1k**, 145 mg, 0.5 mmol, 1.0 equiv). The reaction mixture was quenched after 36 h, and the crude residue was purified by flash column chromatography, eluting with hexanes to provide the title compound as a colorless solid, **m.p.** 54–56 °C. **Yield:** 100 mg, 95%. **<sup>1</sup>H NMR** (600 MHz,  $\text{CDCl}_3$ )  $\delta$  7.32 (d,  $J = 8.3$  Hz, 2H), 7.27 (d,  $J = 8.2$  Hz, 2H), 7.07 (s, 2H), 6.34 (s, 2H), 3.04 – 2.96 (m, 1H), 2.45 – 2.35 (m, 1H), 2.27 – 2.19 (m, 1H), 2.10 – 1.93 (m, 2H), 1.65 – 1.54 (m, 1H), 1.16 (d,  $J = 6.5$  Hz, 3H). **<sup>13</sup>C NMR** (151 MHz,  $\text{CDCl}_3$ )  $\delta$  143.0, 138.9, 127.7, 120.7, 119.6, 110.2, 48.2, 39.6, 26.7, 26.0, 21.1. **IR** (thin film) 2953, 1522, 1325, 1071, 823, 717  $\text{cm}^{-1}$ . **EA** Calcd. for  $\text{C}_{15}\text{H}_{17}\text{N}$ : C, 85.26; H, 8.11. Found: C, 84.96; H, 8.18. **Specific rotation**  $[\alpha]_{\text{D}}^{24} = +76.7$  ( $c = 1.0$ ,  $\text{CHCl}_3$ ). HPLC analysis (OJ column, 99:1 hexanes/isopropanol, 0.8 mL/min,  $t_{\text{m}} = 11.1$  min,  $t_{\text{M}} = 11.7$  min) indicated **99% ee**.

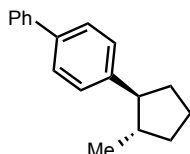

**4-((1S,2S)-2-Methylcyclopentyl)-1,1'-biphenyl (2l):** Prepared following general procedure A using (*E*)-4-(4-bromo-2-methylpent-1-en-1-yl)-1,1'-biphenyl (**1l**, 158 mg, 0.5 mmol, 1.0 equiv) at a reaction temperature of 45 °C. The reaction mixture was quenched after 36 h, and the crude residue was purified by flash column chromatography, eluting with cyclohexane to provide the title compound as a colorless oil. **Yield:** 87 mg, 74%. **<sup>1</sup>H NMR** (600 MHz,  $\text{CDCl}_3$ )  $\delta$  7.64 – 7.49 (m, 4H), 7.49 – 7.37 (m, 2H), 7.37 – 7.27 (m, 3H), 2.53 – 2.40 (m, 1H), 2.16 – 2.07 (m, 1H), 2.07 – 1.91 (m, 2H), 1.85 – 1.70 (m, 3H), 1.42 – 1.28 (m, 1H), 0.97 (d,  $J = 6.4$  Hz, 3H). **<sup>13</sup>C NMR** (151 MHz,  $\text{CDCl}_3$ )  $\delta$  144.8, 141.3, 138.9, 128.8, 128.1, 127.2, 127.1, 127.1, 54.3, 43.2, 35.6, 35.0, 24.1, 18.8. **IR** (thin film) 2953, 1522, 1325, 1071, 823, 717  $\text{cm}^{-1}$ . **EA** Calcd. for  $\text{C}_{18}\text{H}_{20}$ : C, 91.47; H, 8.53. Found: C, 91.19; H, 8.53. **Specific rotation**  $[\alpha]_{\text{D}}^{24} = +50.0$  ( $c = 0.5$ ,  $\text{CHCl}_3$ ). GC analysis (CP-Chirasil-Dex CB column, 25 m  $\times$  0.25 mm  $\times$  0.25  $\mu\text{m}$ ,  $\text{H}_2$  2.7 mL/min, 165 °C (constant),  $t_{\text{m}} = 176.1$  min,  $t_{\text{M}} = 173.6$  min) indicated **98% ee**.

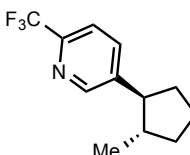

**5-((1*S*,2*S*)-2-methylcyclopentyl)-2-(trifluoromethyl)pyridine (2m):** Prepared following general procedure **A** using (*E*)-5-(5-bromo-2-methylpent-1-en-1-yl)-2-(trifluoromethyl)pyridine (**1m**, 154 mg, 0.5 mmol, 1.0 equiv). The reaction mixture was quenched after 36 h, and the crude residue was purified by flash column chromatography, eluting with a gradient of 0 – 2% Et<sub>2</sub>O in hexanes to provide the title compound as a colorless oil. The title product was somewhat volatile. **Yield:** 99 mg, 84%. **<sup>1</sup>H NMR** (600 MHz, CDCl<sub>3</sub>) δ 8.56 (s, 1H), 7.68 (d, *J* = 7.9 Hz, 1H), 7.61 (d, *J* = 7.9 Hz, 1H), 2.57 – 2.47 (m, 1H), 2.20 – 2.10 (m, 1H), 2.10 – 2.00 (m, 1H), 2.00 – 1.89 (m, 1H), 1.89 – 1.67 (m, 3H), 1.42 – 1.32 (m, 1H), 0.94 (d, *J* = 6.1 Hz, 3H). **<sup>13</sup>C NMR** (151 MHz, CDCl<sub>3</sub>) δ 149.9, 146.2 (q, *J*<sub>CF</sub> = 34.3 Hz), 144.3, 135.9, 121.9 (d, *J*<sub>CF</sub> = 274 Hz), 120.4, 51.8, 43.5, 35.3, 34.8, 24.1, 18.4. **IR** (thin film) 2957, 1339, 1176, 1137, 1087 cm<sup>-1</sup>. **EA** Calcd. for C<sub>12</sub>H<sub>14</sub>F<sub>3</sub>N: C, 62.87; H, 6.16. Found: C, 62.71; H, 6.32. **Specific rotation** [α]<sub>D</sub><sup>24</sup> = +16.3 (*c* = 1.0, CHCl<sub>3</sub>). GC analysis (CP-Chirasil-Dex CB column, 25 m × 0.25 mm × 0.25 μm, H<sub>2</sub> 2.7 mL/min, 50 °C to 150 °C @ 4 °C/min then 150 °C (constant), *t*<sub>m</sub> = 28.9 min, *t*<sub>M</sub> = 28.2 min) indicated **97% ee**.

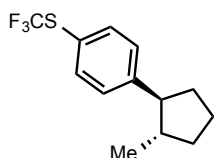

**(4-((1*S*,2*S*)-2-methylcyclopentyl)phenyl)(trifluoromethyl)sulfane (2n):** Prepared following general procedure **A** using (*E*)-(4-(5-bromo-2-methylpent-1-en-1-yl)phenyl)(trifluoromethyl)sulfane (**1n**, 169 mg, 0.5 mmol, 1.0 equiv) at a reaction temperature of 50 °C. The reaction mixture was quenched after 20 h, and the crude residue was purified by flash column chromatography, eluting with cyclohexane to provide the title compound as a colorless oil. **Yield:** 92 mg, 71%. **<sup>1</sup>H NMR** (400 MHz, CDCl<sub>3</sub>) δ 7.67 – 7.53 (m, 2H), 7.37 – 7.19 (m, 2H), 2.52 – 2.41 (m, 1H), 2.19 – 2.08 (m, 1H), 2.08 – 1.98 (m, 1H), 1.98 – 1.87 (m, 1H), 1.86 – 1.67 (m, 3H), 1.41 – 1.27 (m, 1H), 0.95 (d, *J* = 6.4 Hz, 3H). **<sup>13</sup>C NMR** (101 MHz, CDCl<sub>3</sub>) δ 149.1, 136.6, 129.9 (q, *J*<sub>CF</sub> = 308 Hz), 128.8, 121.3, 54.4, 43.4, 35.5, 34.9, 24.1, 18.7. **IR** (thin film) 2955, 1110, 1086, 1016, 825, 756 cm<sup>-1</sup>. **HRMS** (*m/z*, DART-TOF, +ve) Calcd. for [C<sub>13</sub>H<sub>15</sub>F<sub>3</sub>S]<sup>+</sup>: 260.0841. Found: 260.0853. **Specific rotation** [α]<sub>D</sub><sup>23</sup> = +37.5 (*c* = 0.8, CHCl<sub>3</sub>). GC analysis (CP-Chirasil-Dex CB column, 25 m × 0.25 mm × 0.25 μm, H<sub>2</sub> 2.7 mL/min, 50 °C to 150 °C @ 4 °C/min then 150 °C (constant), *t*<sub>m</sub> = 30.1 min, *t*<sub>M</sub> = 29.5 min) indicated **98% ee**.

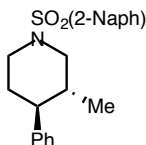

**(3*R*,4*S*)-3-Methyl-1-(naphthalen-2-ylsulfonyl)-4-phenylpiperidine (2o):** Prepared following general procedure **A** using (*E*)-*N*-(2-bromoethyl)-*N*-(2-methyl-3-phenylallyl)naphthalene-2-sulfonamide (**1o**, 222 mg, 0.5 mmol, 1.0 equiv). The reaction mixture was quenched after 36 h, and the crude residue was purified by flash column chromatography, eluting with 60% CH<sub>2</sub>Cl<sub>2</sub> in hexanes to provide the title compound as a colorless solid, **m.p.** 146 – 148 °C. **Yield:** 131 mg, 72%. **<sup>1</sup>H NMR** (600 MHz, CDCl<sub>3</sub>) δ

8.38 (s, 1H), 8.01 (d,  $J = 8.5$  Hz, 2H), 7.95 (d,  $J = 8.1$  Hz, 1H), 7.85 – 7.78 (m, 1H), 7.74 – 7.60 (m, 2H), 7.34 – 7.24 (m, 2H), 7.24 – 7.17 (m, 1H), 7.07 (d,  $J = 7.2$  Hz, 2H), 4.10 – 3.91 (m, 2H), 2.46 – 2.30 (m, 1H), 2.14 – 1.78 (m, 5H), 0.64 (d,  $J = 5.7$  Hz, 3H).  $^{13}\text{C}$  NMR (151 MHz,  $\text{CDCl}_3$ )  $\delta$  143.8, 135.0, 133.5, 132.4, 129.4, 129.3, 129.1, 128.9, 128.7, 128.1, 127.7, 127.6, 126.8, 123.2, 53.4, 49.9, 47.2, 36.3, 33.8, 17.1. IR (thin film) 1347, 1336, 1162, 1132, 751, 702, 656, 647  $\text{cm}^{-1}$ . EA Calcd. for  $\text{C}_{22}\text{H}_{23}\text{NO}_2\text{S}$ : C, 72.30; H, 6.34. Found: C, 72.17; H, 6.28. **Specific rotation**  $[\alpha]_{\text{D}}^{26} = +31.1$  ( $c = 1.0$ ,  $\text{CHCl}_3$ ). HPLC analysis (IA column, 90:10 hexanes/isopropanol, 0.8 mL/min,  $t_{\text{m}} = 15.0$  min,  $t_{\text{M}} = 14.2$  min) indicated **99% ee**.

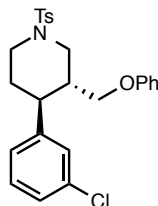

**(3R,4S)-4-(3-Chlorophenyl)-3-(phoxymethyl)-1-tosylpiperidine (2p):** Prepared following general procedure A using (*Z*)-*N*-(2-bromoethyl)-*N*-(3-(3-chlorophenyl)-2-(phoxymethyl)allyl)-4-methylbenzenesulfonamide (**1p**, 268 mg, 0.5 mmol, 1.0 equiv). The reaction mixture was quenched after 30 h, and the crude residue was purified by flash column chromatography, eluting with 12% EtOAc in hexanes to provide the title compound as a colorless solid, **m.p.** 112 – 116 °C. **Yield:** 150 mg, 66%.  $^1\text{H}$  NMR (400 MHz,  $\text{CDCl}_3$ )  $\delta$  7.69 (d,  $J = 8.2$  Hz, 2H), 7.35 (d,  $J = 8.0$  Hz, 2H), 7.29 – 7.16 (m, 4H), 7.10 (s, 1H), 7.05 – 6.97 (m, 1H), 6.92 (t,  $J = 7.3$  Hz, 1H), 6.72 (d,  $J = 7.9$  Hz, 2H), 4.23 – 4.12 (m, 1H), 4.01 – 3.90 (m, 1H), 3.68 (dd,  $J = 9.6, 2.3$  Hz, 1H), 3.48 (dd,  $J = 9.6, 6.2$  Hz, 1H), 2.53 – 2.42 (m, 4H), 2.42 – 2.25 (m, 3H), 1.99 – 1.82 (m, 2H).  $^{13}\text{C}$  NMR (101 MHz,  $\text{CDCl}_3$ )  $\delta$  158.6, 145.0, 143.8, 134.8, 133.4, 130.2, 129.9, 129.6, 127.9, 127.6, 127.4, 125.8, 121.2, 114.6, 67.6, 49.6, 46.8, 43.9, 41.4, 33.3, 21.7. IR (thin film) 1597, 1338, 1241, 1161, 751, 693, 669, 658  $\text{cm}^{-1}$ . EA Calcd. for  $\text{C}_{25}\text{H}_{26}\text{ClNO}_3\text{S}$ : C, 65.85; H, 5.75. Found: C, 65.60; H, 5.73. **Specific rotation**  $[\alpha]_{\text{D}}^{26} = +125$  ( $c = 1.0$ ,  $\text{CHCl}_3$ ). HPLC analysis (IA column, 90:10 hexanes/isopropanol, 0.8 mL/min,  $t_{\text{m}} = 16.7$  min,  $t_{\text{M}} = 21.4$  min) indicated **95% ee**.

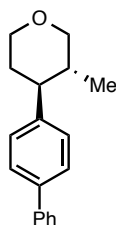

**(3R,4S)-4-([1,1'-Biphenyl]-4-yl)-3-methyltetrahydro-2H-pyran (2q):** Prepared following general procedure A was followed using (*E*)-4-(3-(2-bromoethoxy)-2-methylprop-1-en-1-yl)-1,1'-biphenyl (**1q**, 166 mg, 0.5 mmol, 1.0 equiv). The reaction mixture was quenched after 36 h, and the crude residue was purified by flash column chromatography, eluting with 2.5% EtOAc in hexanes to provide the title compound as a colorless oil. **Yield:** 74 mg, 59%.  $^1\text{H}$  NMR (600 MHz,  $\text{CDCl}_3$ )  $\delta$  7.62 – 7.57 (m, 2H), 7.55 (d,  $J = 8.1$  Hz, 2H), 7.44 (t,  $J = 7.7$  Hz, 2H), 7.34 (t,  $J = 7.4$  Hz, 1H), 7.29 – 7.24 (m, 2H), 4.09 (dd,  $J = 11.3, 4.1$  Hz, 1H), 4.00 (dd,  $J = 11.4, 4.2$  Hz, 1H), 3.56 – 3.48 (m, 1H),

3.14 (t,  $J = 11.1$  Hz, 1H), 2.33 (td,  $J = 11.7, 3.8$  Hz, 1H), 2.01 – 1.84 (m, 2H), 1.79 – 1.69 (m, 1H), 0.66 (d,  $J = 6.6$  Hz, 3H).  $^{13}\text{C}$  NMR (151 MHz,  $\text{CDCl}_3$ )  $\delta$  143.7, 141.1, 139.4, 128.9, 128.1, 127.3, 127.2, 127.1, 74.7, 68.8, 49.6, 36.8, 34.9, 15.1. **IR** (thin film) 2949, 1486, 1134, 1087, 1007, 885, 763, 697  $\text{cm}^{-1}$ . **EA** Calcd. for  $\text{C}_{18}\text{H}_{20}\text{O}$ : C, 85.67; H, 7.99. Found: C, 85.74; H, 7.82. **Specific rotation**  $[\alpha]_{\text{D}}^{24} = +32.8$  ( $c = 0.4$ ,  $\text{CHCl}_3$ ). HPLC analysis (IA column, 97:3 hexanes/isopropanol, 0.8 mL/min,  $t_{\text{m}} = 8.8$  min,  $t_{\text{M}} = 7.8$  min) indicated **93% ee**.

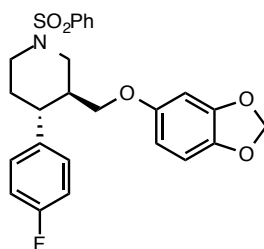

**(3*S*,4*R*)-3-((Benzo[*d*][1,3]dioxol-5-yloxy)methyl)-4-(4-fluorophenyl)-1-(phenylsulfonyl)piperidine (2r)**: Prepared following general procedure **A** using (*Z*)-*N*-(2-((benzo[*d*][1,3]dioxol-5-yloxy)methyl)-3-(4-fluorophenyl)allyl)-*N*-(2-bromoethyl)benzenesulfonamide (**1r**, 335 mg, 0.5 mmol, 1.0 equiv) and (*S*)-DTBM-SEGPHOS (33 mg, 0.028 mmol, 5.5 mol %). The reaction mixture was quenched after 36 h, and the crude residue was purified by flash column chromatography, eluting with 33%  $\text{Et}_2\text{O}$  in pentane to provide the title compound as an off-white gum. **Yield**: 148 mg, 63%. Spectral data were in agreement with those reported in the literature.<sup>1</sup>  **$^1\text{H}$  NMR** (600 MHz,  $\text{CDCl}_3$ )  $\delta$  7.84 – 7.78 (m, 2H), 7.66 – 7.60 (m, 1H), 7.60 – 7.53 (m, 2H), 7.12 – 7.03 (m, 2H), 7.01 – 6.92 (m, 2H), 6.65 – 6.58 (m, 1H), 6.35 – 6.29 (m, 1H), 6.14 – 6.07 (m, 1H), 5.88 (s, 2H), 4.18 – 4.11 (m, 1H), 4.01 – 3.92 (m, 1H), 3.58 (dd,  $J = 9.5, 2.2$  Hz, 1H), 3.39 (dd,  $J = 9.4, 6.6$  Hz, 1H), 2.50 – 2.43 (m, 1H), 2.41 – 2.30 (m, 2H), 2.29 – 2.18 (m, 1H), 1.98 – 1.83 (m, 2H).  **$^{13}\text{C}$  NMR** (151 MHz,  $\text{CDCl}_3$ )  $\delta$  161.8 (d,  $J_{\text{CF}} = 245$  Hz), 154.1, 148.3, 141.9, 138.4 (d,  $J_{\text{CF}} = 3.2$  Hz), 136.3, 133.0, 129.3, 128.9 (d,  $J_{\text{CF}} = 7.7$  Hz), 127.9, 115.8 (d,  $J_{\text{CF}} = 21.2$  Hz), 108.0, 105.6, 101.3, 98.1, 68.6, 49.6, 46.8, 43.2, 41.8, 33.4. **Specific rotation**  $[\alpha]_{\text{D}}^{24} = -85.2$  ( $c = 0.8$ , MeOH). HPLC analysis (IA column, 85:15 hexanes/isopropanol, 0.8 mL/min,  $t_{\text{m}} = 23.8$  min,  $t_{\text{M}} = 15.8$  min) indicated **99% ee**.

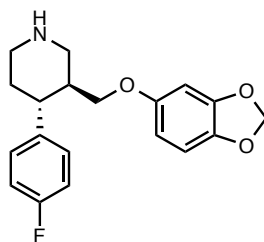

**(-)-Paroxetine**: To a solution of  $\text{SmI}_2$  in THF (0.1 M, 11 mL, 10 equiv) under argon was added a solution of **2r** (50 mg, 0.107 mmol, 1.0 equiv) in anhydrous THF (0.5 mL). Water (0.06 mL, 3.3 mmol, 30 equiv) and pyrrolidine (0.18 mL, 2.2 mmol, 20 equiv) were added sequentially. The reaction mixture was stirred for 5 min at room temperature, upon which the reaction mixture was poured into ether (20 mL) and water (10 mL). The organic and aqueous phases were separated, and the aqueous phase was extracted with additional ether ( $4 \times 10$  mL). The combined organic phases were dried ( $\text{Na}_2\text{SO}_4$ ) and

concentrated to afford the crude product, which was purified by preparative thin layer chromatography (10% Et<sub>3</sub>N in EtOAc) to afford (-)-paroxetine as a yellow oil. **Yield:** 21.5 mg, 61% yield. Spectral data were in agreement with those reported in the literature.<sup>2</sup> **<sup>1</sup>H NMR** (400 MHz, CDCl<sub>3</sub>) δ 7.20 – 7.12 (m, 2H), 7.04 – 6.92 (m, 2H), 6.62 (d, *J* = 8.5 Hz, 1H), 6.33 (d, *J* = 2.5 Hz, 1H), 6.12 (dd, *J* = 8.5, 2.5 Hz, 1H), 5.87 (s, 2H), 3.57 (dd, *J* = 9.4, 3.0 Hz, 1H), 3.48 – 3.37 (m, 2H), 3.24 – 3.11 (m, 1H), 2.83 – 2.52 (m, 3H), 2.11 – 2.00 (m, 1H), 1.87 – 1.63 (m, 3H). **<sup>13</sup>C NMR** (151 MHz, CDCl<sub>3</sub>) δ 161.6 (d, *J*<sub>CF</sub> = 244 Hz), 154.5, 148.3, 141.7, 140.1 (d, *J*<sub>CF</sub> = 3.2 Hz), 128.9 (d, *J*<sub>CF</sub> = 7.8 Hz), 115.5 (d, *J*<sub>CF</sub> = 21.0 Hz), 108.0, 105.6, 101.2, 98.1, 69.7, 50.6, 47.3, 44.8, 43.2, 35.6. **Specific rotation** [α]<sub>D</sub><sup>24</sup> = -80.1 (*c* = 1.0, MeOH), lit. (ref. 2): [α]<sub>D</sub><sup>24</sup> = -90.7 (*c* = 1.0, MeOH).

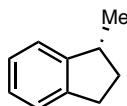

**(R)-1-Methylindane (4a):** Prepared following general procedure **A** with changes as noted below. 2-(2-Bromoethyl)styrene (**3a**, 106 mg, 0.5 mmol, 1.0 equiv), 2.4 equiv dimethoxy(methyl)silane (150 μL, 1.2 mmol), and 0.35 mL THF were used at a reaction temperature of 50 °C. The reaction mixture was quenched after 18 h, and the crude residue was purified by preparative thin layer chromatography, using pentane as the eluent. The title compound was obtained after careful concentration from CH<sub>2</sub>Cl<sub>2</sub> as a colorless oil. **Yield:** 46 mg, 70%. Spectral data were in agreement with those reported in the literature.<sup>3</sup> **<sup>1</sup>H NMR** (400 MHz, CDCl<sub>3</sub>) δ 7.38 – 7.06 (m, 4H), 3.28 – 3.09 (m, 1H), 2.99 – 2.76 (m, 2H), 2.43 – 2.22 (m, 1H), 1.69 – 1.48 (m, 1H), 1.30 (d, *J* = 6.9 Hz, 3H). **<sup>13</sup>C NMR** (101 MHz, CDCl<sub>3</sub>) δ 148.9, 144.0, 126.2 (2 resonances), 124.5, 123.3, 39.6, 34.9, 31.6, 20.0. **Specific rotation** [α]<sub>D</sub><sup>24</sup> = +2.35 (*c* = 1.0, CHCl<sub>3</sub>). GC analysis (CP-Chirasil-Dex CB column, 25 m × 0.25 mm × 0.25 μm, H<sub>2</sub> 2.7 mL/min, 120 °C to 220 °C @ 0.5 °C/min, *t*<sub>m</sub> = 57.8 min, *t*<sub>M</sub> = 58.3 min) indicated **88% ee**.

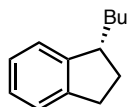

**(R)-1-Butylindane (4b):** Prepared following general procedure **A** using (*E*)-1-(2-bromoethyl)-2-(pent-1-en-1-yl)benzene (**3b**, 126 mg, 0.5 mmol, 1.0 equiv). The reaction mixture was quenched after 36 h, and the crude residue was purified by flash column chromatography, eluting with pentane to provide the title compound as a colorless oil. **Yield:** 80 mg, 92%. Spectral data were in agreement with those reported in the literature.<sup>4</sup> **<sup>1</sup>H NMR** (500 MHz, CDCl<sub>3</sub>) δ 7.25 – 7.20 (m, 2H), 7.20 – 7.13 (m, 2H), 3.17 – 3.06 (m, 1H), 3.00 – 2.89 (m, 1H), 2.89 – 2.80 (m, 1H), 2.36 – 2.24 (m, 1H), 1.95 – 1.80 (m, 1H), 1.77 – 1.63 (m, 1H), 1.51 – 1.33 (m, 5H), 1.00 – 0.91 (m, 3H). **<sup>13</sup>C NMR** (151 MHz, CDCl<sub>3</sub>) δ 148.0, 144.2, 126.3, 126.1, 124.5, 123.7, 45.0, 34.9, 32.3, 31.6, 30.1, 23.1, 14.3. **Specific rotation** [α]<sub>D</sub><sup>24</sup> = -12.8 (*c* = 1.0, CHCl<sub>3</sub>). HPLC analysis (OD-H then OD-H then OD columns in series, 98.5:1.5 hexanes/isopropanol, 0.7 mL/min, *t*<sub>m</sub> = 16.8 min, *t*<sub>M</sub> = 16.3 min) indicated **85% ee**.

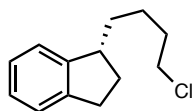

**(R)-1-(4-Chlorobutyl)indane (4c):** Prepared following general procedure A using (*E*)-1-(2-bromoethyl)-2-(5-chloropent-1-en-1-yl)benzene (**3c**, 144 mg, 0.5 mmol, 1.0 equiv) at 50 °C. (The starting material used was contaminated with 4% of the corresponding alkyne. The yield reported is not corrected.) The crude residue was purified by flash column chromatography, eluting with hexanes to provide the title compound as a colorless oil. **Yield:** 73 mg, 70%. Spectral data were in agreement with those reported in the literature.<sup>5</sup> **<sup>1</sup>H NMR** (500 MHz, CDCl<sub>3</sub>) δ 7.32 – 7.14 (m, 4H), 3.63 – 3.56 (m, 2H), 3.18 – 3.08 (m, 1H), 2.99 – 2.92 (m, 1H), 2.90 – 2.81 (m, 1H), 2.38 – 2.26 (m, 1H), 1.94 – 1.82 (m, 3H), 1.75 – 1.67 (m, 1H), 1.64 – 1.54 (m, 2H), 1.50 – 1.41 (m, 1H). **<sup>13</sup>C NMR** (126 MHz, CDCl<sub>3</sub>) δ 147.5, 144.1, 126.4, 126.2, 124.6, 123.6, 45.2, 44.8, 34.4, 33.0, 32.2, 31.5, 25.1. **Specific rotation**  $[\alpha]_{\text{D}}^{24} = +3.01$  (*c* = 0.3, CHCl<sub>3</sub>). HPLC analysis (OD-H column, hexanes, 0.8 mL/min, *t*<sub>m</sub> = 13.0 min, *t*<sub>M</sub> = 14.0 min) indicated **85% ee**.

## Experimental procedures and characterization of substrates:

### General Procedure B for the synthesis of substrates **1a – 1n**:

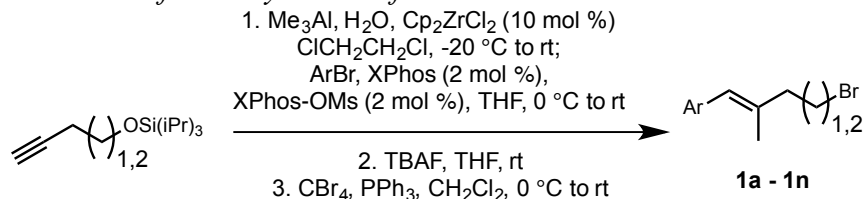

**Caution:**  $\text{Me}_3\text{Al}$  is pyrophoric and should only be used by an experienced individual with appropriate safety precautions.

*Step 1:* A 50 mL round bottom flask (24/40 joint), equipped with a magnetic stir bar and rubber septum, was charged with  $\text{Cp}_2\text{ZrCl}_2$  (584 mg, 2.0 mmol, 10 mol %) and 1,2-dichloroethane (10 mL) and placed under argon. The flask was cooled to  $-20\text{ }^\circ\text{C}$  (ice/salt bath), and  $\text{Me}_3\text{Al}$  (2.0 M in hexanes, 16 mL, 32 mmol, 1.6 equiv) was slowly added via syringe. Water (36  $\mu\text{L}$ , 1.0 mmol, 0.1 equiv) was carefully added to the yellow solution (*Caution: vigorous reaction!*), and the reaction mixture was stirred for an additional 5 min at  $-20\text{ }^\circ\text{C}$ . (But-3-yn-1-yloxy)triisopropylsilane or (pent-4-yn-1-yloxy)triisopropylsilane (24 mmol, 1.2 equiv) was then added by syringe. The reaction mixture was stirred for 2 h at room temperature. The septum was exchanged for a 24/40 hose adapter, which was connected to an external trap cooled in a dry ice/acetone bath. Solvent and excess  $\text{Me}_3\text{Al}$  were removed by placement of the external trap under vacuum until a yellow paste remained in the round bottom flask. After backfilling with argon, the flask was sealed with a rubber septum and cooled to  $0\text{ }^\circ\text{C}$ . (*Caution: The quenching of  $\text{Me}_3\text{Al}$  can be extremely exothermic and should be carried out with all necessary safety precautions. Quench procedure: While still immersed in the dry ice/acetone bath, the trap was detached from the vacuum line, and  $\text{CH}_2\text{Cl}_2$  (50 mL) was added into the trap. This was followed by the dropwise addition of  $\text{MeOH}$  (20 mL). Finally, the trap was allowed to slowly warm to room temperature overnight.*) To the flask containing the vinylaluminum reagent at  $0\text{ }^\circ\text{C}$  was added a solution of aryl halide (20 mmol, 1.0 equiv), XPhos-OMs (G3) precatalyst (338 mg, 0.4 mmol, 2 mol %), and XPhos (191 mg, 0.4 mmol, 2 mol%) in anhydrous THF (20 mL). The resulting yellow solution was allowed to warm to room temperature and stirred until the reaction was determined to be complete by TLC analysis (4 to 16 h). Subsequently, the reaction mixture was transferred to a 250 mL Erlenmeyer flask, diluted with  $\text{Et}_2\text{O}$  (100 mL), and slowly quenched with a saturated aqueous solution of sodium potassium tartrate with stirring until gas evolution ceased and a heavy solid precipitated. The solution was dried ( $\text{Na}_2\text{SO}_4$ ), and solids were removed using a medium porosity sintered funnel. The filtrate was concentrated, and the crude material was used directly in the following step.

*Step 2:* To the crude material obtained above was added THF (20 mL) and tetrabutylammonium fluoride (1.0 M in THF, 24 mL, 1.2 equiv). The flask was sealed with a rubber septum and the reaction mixture, which became dark over time, was stirred at room temperature until reaction was determined to be complete by TLC analysis (1 to 2 h). The reaction mixture was then concentrated to a paste, adsorbed onto silica gel, and purified directly by flash column chromatography to afford the intermediate alcohol.

*Step 3:* A round bottom flask equipped with a magnetic stir bar was charged with the alcohol obtained above (1.0 equiv),  $\text{CBr}_4$  (1.2 equiv), and anhydrous  $\text{CH}_2\text{Cl}_2$  (0.33

M). The solution was stirred at 0 °C and triphenylphosphine (1.1 equiv) was added portionwise over 2 min. The reaction mixture was then allowed to warm to room temperature and stirred for 30 min. The reaction mixture was then concentrated and purified directly by column chromatography, first eluting with hexanes to remove CBr<sub>4</sub> and CHBr<sub>3</sub>, then eluting with a gradient of Et<sub>2</sub>O or EtOAc in pentane or hexanes to provide the desired alkyl bromide. Alkyl bromides were stored under refrigeration at -20 °C and were warmed to room temperature before use.

### Characterization of substrates 1a – 1n:

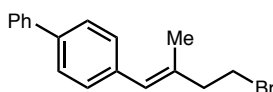

**(E)-4-(4-Bromo-2-methylbut-1-en-1-yl)-1,1'-biphenyl (1a):** Prepared following general procedure **B** using 4-bromobiphenyl (4.66 g, 20 mmol, 1.0 equiv) and (but-3-yn-1-yloxy)triisopropylsilane (5.42 g, 24 mmol, 1.2 equiv) to provide the corresponding homoallylic alcohol (1.86 g, 7.8 mmol), which was converted to the bromide using CBr<sub>4</sub> (3.10 g, 9.4 mmol, 1.2 equiv) and triphenylphosphine (2.25 g, 8.6 mmol, 1.1 equiv). The residue was purified by flash column chromatography, eluting with a gradient of 0 – 2% Et<sub>2</sub>O in hexanes to provide the title compound as a colorless solid, **m.p.** 38 – 40 °C. **Yield:** 1.96 g, 33% over 3 steps. **<sup>1</sup>H NMR** (600 MHz, CDCl<sub>3</sub>) δ 7.63 – 7.59 (m, 2H), 7.59 – 7.54 (m, 2H), 7.46 – 7.41 (m, 2H), 7.37 – 7.31 (m, 3H), 6.39 (s, 1H), 3.57 (t, *J* = 7.4 Hz, 2H), 2.76 (t, *J* = 7.4 Hz, 2H), 1.94 (s, 3H). **<sup>13</sup>C NMR** (151 MHz, CDCl<sub>3</sub>) δ 141, 139.2, 137.0, 135.7, 129.4, 128.9, 127.6, 127.4, 127.1, 127.0, 44.0, 31.4, 17.7. **IR** (thin film) 1485, 1007, 857, 758, 736, 695, 667, 619 cm<sup>-1</sup>. **EA** Calcd. for C<sub>17</sub>H<sub>17</sub>Br: C, 67.79; H, 5.69. Found: C, 68.02; H, 5.80.

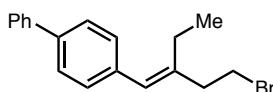

**(E)-4-(4-Bromo-2-ethylbut-1-en-1-yl)-1,1'-biphenyl (1b):** Prepared following general procedure **B** on 10 mmol scale using 4-bromobiphenyl (2.33 g, 10 mmol, 1 equiv), (but-3-yn-1-yloxy)triisopropylsilane (2.71 g, 12 mmol, 1.2 equiv), and triethylaluminum (1.85 M in toluene, 5.5 mL, 1.0 equiv) in place of trimethylaluminum to afford the corresponding homoallylic alcohol (780 mg, 3.1 mmol), which was converted to the bromide using CBr<sub>4</sub> (1.23 g, 3.7 mmol, 1.2 equiv) and triphenylphosphine (893 mg, 3.4 mmol, 1.1 equiv). The residue was purified by flash column chromatography, eluting with a gradient of 0 – 2% Et<sub>2</sub>O in hexanes to provide the title compound as a colorless oil. **Yield:** 470 mg, 15% over 3 steps. **<sup>1</sup>H NMR** (400 MHz, CDCl<sub>3</sub>) δ 7.68 – 7.53 (m, 4H), 7.53 – 7.40 (m, 2H), 7.40 – 7.28 (m, 3H), 6.35 (s, 1H), 3.56 (t, *J* = 7.7 Hz, 2H), 2.76 (t, *J* = 7.6 Hz, 2H), 2.33 (q, *J* = 7.5 Hz, 2H), 1.13 (t, *J* = 7.5 Hz, 3H). **<sup>13</sup>C NMR** (101 MHz, CDCl<sub>3</sub>) δ 141.8, 141.0, 139.3, 136.9, 129.1, 128.9, 127.4, 127.1, 127.1, 127.0, 40.3, 31.5, 23.8, 13.2. **IR** (thin film) 2965, 1486, 763, 737, 697 cm<sup>-1</sup>. **EA** Calcd. for C<sub>18</sub>H<sub>19</sub>Br: C, 68.58; H, 6.08. Found: C, 68.85; H, 5.94.



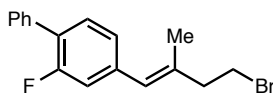

**(E)-4-(4-Bromo-2-methylbut-1-en-1-yl)-2-fluoro-1,1'-biphenyl (1c):** Prepared following general procedure **B** on 10 mmol scale using 2-fluoro-4-bromobiphenyl (2.51 g, 10 mmol, 1.0 equiv) and (but-3-yn-1-yloxy)triisopropylsilane (2.71 g, 12 mmol, 1.2 equiv) to provide the corresponding homoallylic alcohol (1.20 g, 4.7 mmol), which was converted to the bromide using  $\text{CBr}_4$  (1.86 g, 5.6 mmol, 1.2 equiv) and triphenylphosphine (1.36 g, 5.2 mmol, 1.1 equiv). The residue was purified by flash column chromatography, eluting with a gradient of 0 – 2%  $\text{Et}_2\text{O}$  in hexanes to provide the title compound as a colorless oil. **Yield:** 1.37 g, 43% over 3 steps.  $^1\text{H NMR}$  (400 MHz,  $\text{CDCl}_3$ )  $\delta$  7.63 – 7.54 (m, 2H), 7.52 – 7.30 (m, 4H), 7.15 – 7.03 (m, 2H), 6.34 (s, 1H), 3.57 (t,  $J = 7.3$  Hz, 2H), 2.76 (t,  $J = 7.3$  Hz, 2H), 1.95 (d,  $J = 1.1$  Hz, 3H).  $^{13}\text{C NMR}$  (101 MHz,  $\text{CDCl}_3$ )  $\delta$  159.6 (d,  $J_{\text{CF}} = 248$  Hz), 139.1 (d,  $J_{\text{CF}} = 8.2$  Hz), 136.9, 135.8, 130.4 (d,  $J_{\text{CF}} = 4.1$  Hz), 129.1 (d,  $J_{\text{CF}} = 3.1$  Hz), 128.6, 127.7, 127.0 (d,  $J_{\text{CF}} = 13.6$  Hz), 126.7 (d,  $J_{\text{CF}} = 1.9$  Hz), 125.1 (d,  $J_{\text{CF}} = 3.2$  Hz), 116.4 (d,  $J_{\text{CF}} = 23.3$  Hz), 43.8, 31.1, 17.7. **IR** (thin film) 1482, 1410, 1267, 1128, 886, 765, 718, 697  $\text{cm}^{-1}$ . **EA** Calcd. for  $\text{C}_{17}\text{H}_{16}\text{BrF}$ : C, 63.96; H, 5.05. Found: C, 63.92; H, 5.17.

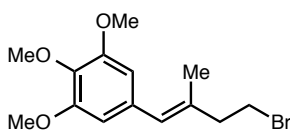

**(E)-5-(4-Bromo-2-methylbut-1-en-1-yl)-1,2,3-trimethoxybenzene (1d):** Prepared following general procedure **B** on 10 mmol scale using 5-bromo-1,2,3-trimethoxybenzene (2.47 g, 10 mmol, 1.0 equiv) and (but-3-yn-1-yloxy)triisopropylsilane (2.71 g, 12 mmol, 1.2 equiv) to provide the corresponding homoallylic alcohol (925 mg, 3.7 mmol), which was converted to the bromide using  $\text{CBr}_4$  (1.47 g, 4.4 mmol, 1.2 equiv) and triphenylphosphine (1.06 g, 4.1 mmol, 1.1 equiv). The residue was purified by flash column chromatography, eluting with a gradient of 5 – 20%  $\text{Et}_2\text{O}$  in hexanes to provide the title compound as a colorless oil. **Yield:** 856 mg, 27% over 3 steps.  $^1\text{H NMR}$  (600 MHz,  $\text{CDCl}_3$ )  $\delta$  6.46 (s, 2H), 6.30 (s, 1H), 3.86 (s, 6H), 3.85 (s, 3H), 3.55 (t,  $J = 7.4$  Hz, 2H), 2.72 (t,  $J = 7.3$  Hz, 2H), 1.91 (s, 3H).  $^{13}\text{C NMR}$  (151 MHz,  $\text{CDCl}_3$ )  $\delta$  153.0, 136.9, 135.2, 133.6, 128.0, 106.2, 61.1, 56.2, 43.8, 31.3, 17.7. **IR** (thin film) 2925, 1579, 1505, 1452, 1414, 1331, 1237, 1124, 1007  $\text{cm}^{-1}$ . **EA** Calcd. for  $\text{C}_{14}\text{H}_{19}\text{BrO}_3$ : C, 53.35; H, 6.08. Found: C, 53.38; H, 6.14.

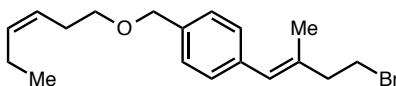

**1-((E)-4-Bromo-2-methylbut-1-en-1-yl)-4-(((Z)-hex-3-en-1-yl)oxy)methylbenzene (1e):** Prepared following general procedure **B** using (Z)-1-bromo-4-((hex-3-en-1-yloxy)methyl)benzene (5.38 g, 20 mmol, 1.0 equiv) and (but-3-yn-1-yloxy)triisopropylsilane (5.42 g, 24 mmol, 1.2 equiv) to provide the corresponding homoallylic alcohol (2.30 g, 8.4 mmol), a portion (1.00 g, 3.65 mmol) of which was converted to the bromide using  $\text{CBr}_4$  (1.45 g, 4.4 mmol, 1.2 equiv) and triphenylphosphine (1.05 g, 4.1 mmol, 1.1 equiv). The residue was purified by flash column chromatography, eluting with a gradient of 0 – 1%  $\text{Et}_2\text{O}$  in pentane to provide the

title compound as a colorless oil. **Yield:** 950 mg, 65% over 3 steps. **<sup>1</sup>H NMR** (600 MHz, CDCl<sub>3</sub>) δ 7.30 (d, *J* = 8.0 Hz, 2H), 7.22 (d, *J* = 8.0 Hz, 2H), 6.34 (s, 1H), 5.48 (ddd, *J* = 12.7, 9.8, 7.2 Hz, 1H), 5.37 (ddd, *J* = 10.7, 9.7, 7.2 Hz, 1H), 4.51 (s, 2H), 3.55 (t, *J* = 7.5 Hz, 2H), 3.48 (t, *J* = 7.0 Hz, 2H), 2.73 (t, *J* = 7.4 Hz, 2H), 2.38 (q, *J* = 7.0 Hz, 2H), 2.15 – 2.02 (m, 2H), 1.88 (d, *J* = 0.9 Hz, 3H), 0.97 (t, *J* = 7.5 Hz, 3H). **<sup>13</sup>C NMR** (151 MHz, CDCl<sub>3</sub>) δ 137.2, 136.7, 135.5, 133.8, 129.0, 127.7, 127.6, 125.0, 72.8, 70.2, 43.9, 31.4, 28.0, 20.8, 17.5, 14.4. **IR** (thin film) 2961, 2853, 1357, 1264, 1212, 1097, 1017 cm<sup>-1</sup>. **EA** Calcd. for C<sub>18</sub>H<sub>25</sub>BrO: C, 64.10; H, 7.47. Found: C, 64.31; H, 7.38.

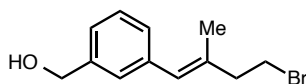

**(E)-3-(4-bromo-2-methylbut-1-en-1-yl)phenylmethanol (1f):** To a solution of *tert*-butyl (*E*)-3-(4-bromo-2-methylbut-1-en-1-yl)benzoate (*vide infra*) (480 mg, 1.47 mmol, 1.0 equiv) in dichloromethane (10 mL) at 0 °C was added a solution of DIBAL-H (1 M in toluene, 3.2 mL, 3.2 mmol, 2.2 equiv). After the reaction mixture was stirred for 30 min at 0 °C, Na<sub>2</sub>SO<sub>4</sub> (sat.) was carefully added at room temperature, and stirring was continued until a solid precipitated and the supernatant solution became clear. The solids were removed by filtration, and the filtrate was concentrated to afford the crude product, which was purified by flash column chromatography, eluting with 25% EtOAc in hexanes to provide the title compound as a colorless oil. **Yield:** 250 mg, 67%. **<sup>1</sup>H NMR** (400 MHz, CDCl<sub>3</sub>) δ 7.38 – 7.29 (m, 1H), 7.27 – 7.14 (m, 3H), 6.36 (s, 1H), 4.70 (s, 2H), 3.55 (t, *J* = 7.4 Hz, 2H), 2.73 (t, *J* = 7.4 Hz, 2H), 1.89 (s, 3H), 1.63 (br. s, 1H). **<sup>13</sup>C NMR** (101 MHz, CDCl<sub>3</sub>) δ 140.9, 138.3, 135.8, 128.5, 128.3, 127.8, 127.6, 125.2, 65.6, 43.8, 31.3, 17.6. **IR** (thin film) 3302, 1436, 1264, 1212, 1012, 763, 713, 700 cm<sup>-1</sup>. **EA** Calcd. for C<sub>12</sub>H<sub>15</sub>BrO: C, 56.49; H, 5.93. Found: C, 56.73; H, 5.85.

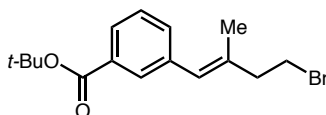

***tert*-Butyl (E)-3-(4-bromo-2-methylbut-1-en-1-yl)benzoate (1g):** Prepared following general procedure **B** using *tert*-butyl 3-bromobenzoate (5.14 g, 20 mmol, 1.0 equiv) and (but-3-yn-1-yloxy)triisopropylsilane (5.42 g, 24 mmol, 1.2 equiv) to provide the corresponding homoallylic alcohol (3.12 g, 11.9 mmol), which was converted to the bromide using CBr<sub>4</sub> (4.75 g, 14.3 mmol, 1.2 equiv) and triphenylphosphine (3.43 g, 13.1 mmol, 1.1 equiv). The residue was purified by flash column chromatography, eluting with a gradient of 0 – 2.5% Et<sub>2</sub>O in pentane to provide the title compound as a colorless oil. **Yield:** 3.32 g, 51% over 3 steps. **<sup>1</sup>H NMR** (500 MHz, CDCl<sub>3</sub>) δ 7.93 – 7.80 (m, 2H), 7.43 – 7.33 (m, 2H), 6.37 (s, 1H), 3.55 (t, *J* = 7.4 Hz, 2H), 2.74 (td, *J* = 7.4, 0.7 Hz, 2H), 1.88 (d, *J* = 1.3 Hz, 3H), 1.60 (s, 9H). **<sup>13</sup>C NMR** (126 MHz, CDCl<sub>3</sub>) δ 165.9, 137.9, 136.5, 132.9, 132.0, 129.9, 128.1, 127.5, 127.2, 81.1, 43.7, 31.2, 28.3, 17.5. **IR** (thin film) 1710, 1367, 1296, 1257, 1158, 1109, 1081, 849, 745 cm<sup>-1</sup>. **EA** Calcd. for C<sub>16</sub>H<sub>21</sub>BrO<sub>2</sub>: C, 59.09; H, 6.51. Found: C, 59.35; H, 6.54.

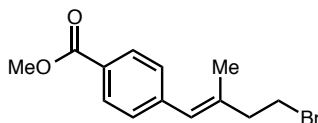

**Methyl (*E*)-4-(4-bromo-2-methylbut-1-en-1-yl)benzoate (**1h**):** Prepared following general procedure **B** using methyl 4-bromobenzoate (4.30 g, 20 mmol, 1.0 equiv) and (but-3-yn-1-yloxy)triisopropylsilane (5.42 g, 24 mmol, 1.2 equiv) to provide the corresponding homoallylic alcohol (3.12 g, 6.68 mmol), which was converted to the bromide using CBr<sub>4</sub> (2.66 g, 8.0 mmol, 1.2 equiv) and triphenylphosphine (1.92 g, 7.3 mmol, 1.1 equiv). The residue was purified by flash column chromatography, eluting with 5% Et<sub>2</sub>O in pentane to provide the title compound as a colorless oil. **Yield:** 1.21 g, 21% over 3 steps. <sup>1</sup>H NMR (400 MHz, CDCl<sub>3</sub>) δ 7.99 (d, *J* = 8.4 Hz, 2H), 7.30 (d, *J* = 8.3 Hz, 2H), 6.38 (s, 1H), 3.91 (s, 3H), 3.55 (t, *J* = 7.3 Hz, 2H), 2.75 (t, *J* = 7.3 Hz, 2H), 1.90 (s, 3H). <sup>13</sup>C NMR (101 MHz, CDCl<sub>3</sub>) δ 167.1, 142.7, 137.8, 129.6, 128.9, 128.1, 127.3, 52.2, 43.8, 31.0, 17.7. **IR** (thin film) 1716, 1434, 1275, 1178, 1102, 757 cm<sup>-1</sup>. **EA** Calcd. for C<sub>13</sub>H<sub>15</sub>BrO<sub>2</sub>: C, 55.14; H, 5.34. Found: C, 55.24; H, 5.41.

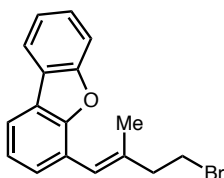

**(*E*)-4-(4-Bromo-2-methylbut-1-en-1-yl)dibenzo[*b,d*]furan (**1i**):** Prepared following general procedure **B** on 10 mmol scale using 4-bromodibenzo[*b,d*]furan (2.47 g, 10 mmol, 1.0 equiv) and (but-3-yn-1-yloxy)triisopropylsilane (2.71 g, 12 mmol, 1.2 equiv) to provide the corresponding homoallylic alcohol (795 mg, 3.15 mmol), which was converted to the bromide using CBr<sub>4</sub> (1.25 g, 3.8 mmol, 1.2 equiv) and triphenylphosphine (907 mg, 3.5 mmol, 1.1 equiv). The residue was purified by flash column chromatography, eluting with 1% Et<sub>2</sub>O in hexanes to provide the title compound as a colorless solid, **m.p.** 43 – 43 °C. **Yield:** 705 mg, 22% over 3 steps. <sup>1</sup>H NMR (600 MHz, CDCl<sub>3</sub>) δ 7.95 (d, *J* = 7.7 Hz, 1H), 7.84 (d, *J* = 7.5 Hz, 1H), 7.59 (d, *J* = 8.2 Hz, 1H), 7.52 – 7.41 (m, 1H), 7.41 – 7.29 (m, 3H), 6.71 (s, 1H), 3.65 (t, *J* = 7.5 Hz, 2H), 2.88 (t, *J* = 7.5 Hz, 2H), 1.94 (d, *J* = 0.9 Hz, 3H). <sup>13</sup>C NMR (151 MHz, CDCl<sub>3</sub>) δ 156.1, 154.0, 138.2, 127.5, 127.2, 124.5, 124.2, 122.8, 122.6, 122.6, 121.2, 120.8, 119.1, 111.9, 43.7, 31.3, 18.1. **IR** (thin film) 1449, 1412, 1264, 1186, 845, 747 cm<sup>-1</sup>. **EA** Calcd. for C<sub>17</sub>H<sub>15</sub>BrO: C, 64.78; H, 4.80. Found: C, 64.92; H, 4.82.

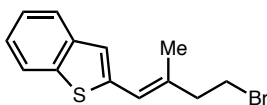

**(*E*)-2-(4-Bromo-2-methylbut-1-en-1-yl)benzo[*b*]thiophene (**1j**):** Prepared following general procedure **B** on 10 mmol scale using 2-bromobenzo[*b*]thiophene (2.13 g, 10 mmol, 1.0 equiv) and (but-3-yn-1-yloxy)triisopropylsilane (2.71 g, 12 mmol, 1.2 equiv) to provide the corresponding homoallylic alcohol (205 mg, 0.94 mmol), which was converted to the bromide using CBr<sub>4</sub> (374 mg, 1.1 mmol, 1.2 equiv) and triphenylphosphine (271 mg, 1.0 mmol, 1.1 equiv). The residue was purified by flash column chromatography, eluting with 2% Et<sub>2</sub>O in hexanes to provide the title compound as a colorless solid, **m.p.** 86 – 87 °C. **Yield:** 160 mg, 6% over 3 steps. <sup>1</sup>H NMR (600 MHz, CDCl<sub>3</sub>) δ 7.79 (d, *J* = 7.9 Hz, 1H), 7.72 (d, *J* = 7.8 Hz, 1H), 7.41 – 7.27 (m, 2H), 7.16 (s, 1H), 6.53 (s, 1H), 3.55 (t, *J* = 7.4 Hz, 2H), 2.78 (t, *J* = 7.4 Hz, 2H), 2.09 (s, 3H). <sup>13</sup>C NMR (151 MHz, CDCl<sub>3</sub>) δ 140.8, 139.8, 139.6, 136.9, 124.5, 124.2, 123.4, 123.4,

122.1, 121.7, 44.3, 30.9, 18.3. **IR** (thin film) 1233, 1211, 833, 885, 752, 729, 651  $\text{cm}^{-1}$ . **EA** Calcd. for  $\text{C}_{13}\text{H}_{13}\text{BrS}$ : C, 55.53; H, 4.66. Found: C, 55.56; H, 4.63.

(Alternatively, the homoallylic alcohol prepared above could be accessed in higher yield by Suzuki coupling: A mixture of thiophene-2-boronic acid (765 mg, 4.3 mmol, 1.4 equiv), (*E*)-*tert*-butyl((4-iodo-3-methylbut-3-en-1-yl)oxy)dimethylsilane (978 mmol, 3 mmol, 1.0 equiv),  $\text{Pd}(\text{OAc})_2$  (34 mg, 0.15 mmol, 5 mol %), XPhos (143 mg, 0.30 mmol, 10 mol %),  $\text{K}_3\text{PO}_4 \cdot \text{H}_2\text{O}$  (2.07 g, 9 mmol, 3.0 equiv) in dioxane/ $\text{H}_2\text{O}$  (6 mL:0.6 mL) was degassed and stirred vigorously under argon at 90 °C for 4 h. Subsequently, the reaction mixture was filtered through a pad of silica gel ( $\text{CH}_2\text{Cl}_2$ ) and concentrated. The crude product was dissolved in THF (6 mL) and treated with tetrabutylammonium fluoride (1.0 M in THF, 6 mL, 6 mmol). The reaction mixture was stirred for 2 h at room temperature, concentrated, and purified by column chromatography to afford the homoallylic alcohol. Yield: 359 mg, 55% over 2 steps)

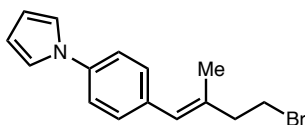

**(*E*)-1-(4-(4-Bromo-2-methylbut-1-en-1-yl)phenyl)-1*H*-pyrrole (1k):** Prepared following general procedure **B** on 5 mmol scale using 1-(4-iodophenyl)-1*H*-pyrrole (1.35 g, 5 mmol, 1.0 equiv) and (but-3-yn-1-yloxy)triisopropylsilane (396 mg, 6 mmol, 1.2 equiv) to provide the corresponding homoallylic alcohol (396 mg, 1.74 mmol), which was converted to the bromide using  $\text{CBr}_4$  (692 mg, 2.1 mmol, 1.2 equiv) and triphenylphosphine (501 mg, 1.9 mmol, 1.1 equiv). The residue was purified by flash column chromatography, eluting with 2.5% EtOAc in hexanes to provide the title compound as a colorless solid, **m.p.** 61 – 62 °C. **Yield:** 473 mg, 33% over 3 steps.  **$^1\text{H}$  NMR** (600 MHz,  $\text{CDCl}_3$ )  $\delta$  7.38 – 7.34 (m, 2H), 7.30 (d,  $J = 8.4$  Hz, 2H), 7.15 – 7.05 (m, 2H), 6.45 – 6.28 (m, 3H), 3.56 (t,  $J = 7.4$  Hz, 2H), 2.75 (t,  $J = 7.4$  Hz, 2H), 1.91 (d,  $J = 1.3$  Hz, 3H).  **$^{13}\text{C}$  NMR** (151 MHz,  $\text{CDCl}_3$ )  $\delta$  139.0, 135.7, 135.4, 130.1, 127.1, 120.2, 119.4, 110.5, 43.8, 31.3, 17.6. **IR** (thin film) 1525, 1329, 1077, 884, 826, 718, 611  $\text{cm}^{-1}$ . **EA** Calcd. for  $\text{C}_{15}\text{H}_{16}\text{BrN}$ : C, 62.08; H, 5.56. Found: C, 61.80; H, 5.38.

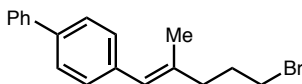

**(*E*)-4-(5-Bromo-2-methylpent-1-en-1-yl)-1,1'-biphenyl (1l):** Prepared following general procedure **B** using 4-bromobiphenyl (4.66 g, 20 mmol, 1.0 equiv) and (pent-4-yn-1-yloxy)triisopropylsilane (5.76 g, 24 mmol, 1.2 equiv) to provide the corresponding bishomoallylic alcohol (1.42 g, 5.6 mmol), which was converted to the bromide using  $\text{CBr}_4$  (2.23 g, 6.7 mmol, 1.2 equiv) and triphenylphosphine (1.61 g, 6.2 mmol, 1.1 equiv). The residue was purified by flash column chromatography, eluting with a gradient of 0 – 2% Et<sub>2</sub>O in hexanes to provide the title compound as a colorless solid, **m.p.** 68 – 69 °C. **Yield:** 1.30 g, 21% over 3 steps.  **$^1\text{H}$  NMR** (500 MHz,  $\text{CDCl}_3$ )  $\delta$  7.66 – 7.60 (m, 2H), 7.60 – 7.56 (m, 2H), 7.50 – 7.42 (m, 2H), 7.39 – 7.30 (m, 3H), 6.38 (s, 1H), 3.48 (t,  $J = 6.7$  Hz, 2H), 2.37 (t,  $J = 7.3$  Hz, 2H), 2.15 – 2.08 (m, 2H), 1.94 (d,  $J = 1.2$  Hz, 3H).  **$^{13}\text{C}$  NMR** (101 MHz,  $\text{CDCl}_3$ )  $\delta$  141.0, 139.0, 137.4 (2 resonances), 129.4, 128.9, 127.3, 127.1, 126.9, 125.9, 39.2, 33.4, 31.1, 18.0. **IR** (thin film) 1487, 1408, 1246, 877, 763,

756, 734, 688  $\text{cm}^{-1}$ . **EA** Calcd. for  $\text{C}_{18}\text{H}_{19}\text{Br}$ : C, 68.58; H, 6.08. Found: C, 68.81; H, 6.10.

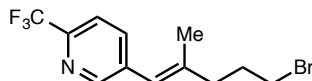

**(E)-5-(5-Bromo-2-methylpent-1-en-1-yl)-2-(trifluoromethyl)pyridine (1m)**: Prepared following general procedure **B** on 10 mmol scale using 5-bromo-2-(trifluoromethyl)pyridine (2.26 g, 10 mmol, 1.0 equiv) and (pent-4-yn-1-yloxy)triisopropylsilane (2.88 g, 12 mmol, 1.2 equiv) to provide the corresponding bishomoallylic alcohol (929 mg, 3.8 mmol), which was converted to the bromide using  $\text{CBr}_4$  (1.38 g, 4.2 mmol, 1.1 equiv) and triphenylphosphine (1.09 g, 4.2 mmol, 1.1 equiv). The residue was purified by flash column chromatography, eluting with a gradient of 0 – 10% EtOAc in hexanes to provide the title compound as a yellow oil, which was immediately refrigerated at  $-20\text{ }^\circ\text{C}$  upon isolation. **Yield**: 920 mg, 30% over 3 steps.  $^1\text{H NMR}$  (500 MHz,  $\text{CDCl}_3$ )  $\delta$  8.58 (d,  $J = 1.5$  Hz, 1H), 7.69 (dd,  $J = 8.1, 2.0$  Hz, 1H), 7.63 (d,  $J = 8.1$  Hz, 1H), 6.31 (s, 1H), 3.45 (t,  $J = 6.6$  Hz, 2H), 2.54 – 2.25 (m, 2H), 2.20 – 1.98 (m, 2H), 1.89 (d,  $J = 1.3$  Hz, 3H).  $^{13}\text{C NMR}$  (126 MHz,  $\text{CDCl}_3$ )  $\delta$  150.3, 142.6, 137.0, 121.6, 120.2 – 120.0 (m), 39.1, 33.2, 30.9, 18.1. **IR** (thin film) 1336, 1175, 1132, 1086, 1024  $\text{cm}^{-1}$ . **EA** Calcd. for  $\text{C}_{12}\text{H}_{13}\text{BrF}_3\text{N}$ : C 46.77; H, 4.25. Found: C, 46.63; H, 4.11.

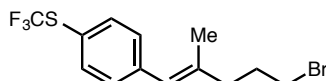

**(E)-4-(5-Bromo-2-methylpent-1-en-1-yl)phenyl(trifluoromethyl)sulfane (1n)**: Prepared following general procedure **B** using 4-bromophenyl trifluoromethyl sulfide (5.14 g, 20 mmol, 1.0 equiv) and (pent-4-yn-1-yloxy)triisopropylsilane (5.76 g, 24 mmol, 1.2 equiv) to provide the corresponding bishomoallylic alcohol (1.56 mg, 5.7 mmol), which was converted to the bromide using  $\text{CBr}_4$  (2.25 g, 6.8 mmol, 1.2 equiv) and triphenylphosphine (1.63 g, 6.2 mmol, 1.1 equiv). The residue was purified by flash column chromatography, eluting with 1% EtOAc in pentane to provide the title compound as a colorless oil. **Yield**: 1.57 g, 23% over 3 steps.  $^1\text{H NMR}$  (600 MHz,  $\text{CDCl}_3$ )  $\delta$  7.62 (d,  $J = 7.8$  Hz, 2H), 7.30 (d,  $J = 8.3$  Hz, 2H), 6.35 (s, 1H), 3.48 (t,  $J = 6.4$  Hz, 2H), 2.38 (t,  $J = 7.0$  Hz, 2H), 2.21 – 2.04 (m, 2H), 1.91 (s, 3H).  $^{13}\text{C NMR}$  (151 MHz,  $\text{CDCl}_3$ )  $\delta$  141.1, 139.6, 136.3, 129.9, 129.8 (q,  $J_{\text{CF}} = 308$  Hz), 125.1, 121.6, 39.1, 33.2, 30.9, 18.0. **IR** (thin film) 1492, 1153, 1114, 1085, 1015, 865, 756  $\text{cm}^{-1}$ . **EA** Calcd. for  $\text{C}_{13}\text{H}_{14}\text{BrF}_3\text{S}$ : C 46.03; H, 4.16. Found: C, 46.03; H, 4.13.

**General procedure C for the Synthesis of Substrates 3b and 3c:**

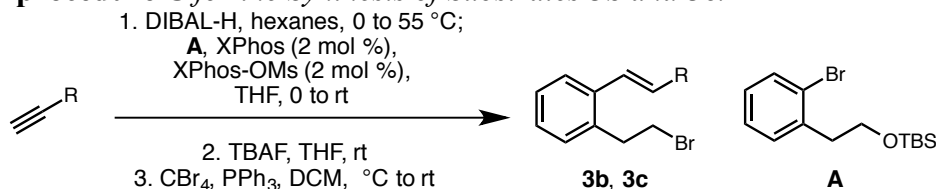

*Step 1*: A flame-dried screw-top reaction tube equipped with a magnetic stir bar and Teflon screw cap was charged with a solution of DIBAL-H (1.0 M in hexanes, 5 mL, 5

mmol, 1 equiv) via syringe. Under argon, the solution was cooled to 0 °C and terminal alkyne (5 mmol, 1 equiv) was slowly added by syringe. The reaction tube was allowed to warm to room temperature and then immersed in an oil bath preheated to 55 °C and stirred for 2 h to afford a solution of the vinylaluminum reagent. The reaction tube containing the vinylaluminum reagent was cooled to 0 °C, and a solution of aryl bromide (5 mmol, 1.0 equiv), XPhos-OMs (G3) precatalyst (85 mg, 0.1 mmol, 2 mol %), and XPhos (48 mg, 0.1 mmol, 2 mol %) in THF (5 mL) was added slowly by syringe. After the addition was complete, the pale yellow solution was warmed to room temperature and stirred until reaction was determined to be complete by TLC analysis (2 to 16 h). Subsequently, the reaction mixture was transferred to a 250 mL Erlenmeyer flask and diluted with Et<sub>2</sub>O. A saturated solution of sodium potassium tartrate was carefully added with stirring until no further precipitation of white solid was observed. MgSO<sub>4</sub> was then added, and the reaction mixture was filtered through a sintered funnel. The filtrate was concentrated to afford the crude product, which was used without further purification.

*Step 2:* The crude product obtained above was dissolved in THF (25 mL), and tetrabutylammonium fluoride (1 M in THF, 6 mL, 6 mmol, 1.2 equiv) was added. The reaction mixture was stirred at room temperature until the process was judged to be complete by TLC (~1 h). The mixture was then diluted with water (50 mL) and extracted with Et<sub>2</sub>O (3 × 25 mL). The combined organic layers were dried (MgSO<sub>4</sub>), filtered through a pad of silica gel, and concentrated. The crude residue was then purified by flash column chromatography, eluting with a gradient of EtOAc in hexanes to provide the desired alcohol.

*Step 3:* A round bottom flask equipped with a magnetic stir bar was charged with the alcohol obtained above (1.0 equiv), CBr<sub>4</sub> (1.2 equiv), and anhydrous CH<sub>2</sub>Cl<sub>2</sub> (0.33 M). The solution was stirred at 0 °C and triphenylphosphine (1.1 equiv) was added portionwise over 2 min. The reaction mixture was then allowed to warm to room temperature and stirred for 30 min. The reaction mixture was then concentrated and purified directly by column chromatography, first eluting with hexanes to remove CBr<sub>4</sub> and CHBr<sub>3</sub>, then eluting with a gradient of Et<sub>2</sub>O or EtOAc in pentane or hexanes to provide the desired alkyl bromide. Alkyl bromides were stored under refrigeration at -20 °C and were warmed to room temperature before use.

### Characterization of substrates 3a – 3c:

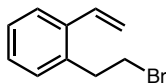

**1-(2-Bromoethyl)-2-vinylbenzene (3a):** The title compound was prepared according to a literature procedure.<sup>6</sup> <sup>1</sup>H NMR (500 MHz, CDCl<sub>3</sub>) δ 7.59 – 7.48 (m, 1H), 7.36 – 7.24 (m, 2H), 7.24 – 7.16 (m, 1H), 6.99 (dd, *J* = 17.3, 11.0 Hz, 1H), 5.71 (dd, *J* = 17.3, 1.0 Hz, 1H), 5.39 (dd, *J* = 10.9, 1.0 Hz, 1H), 3.61 – 3.48 (m, 2H), 3.33 – 3.20 (m, 2H). <sup>13</sup>C NMR (126 MHz, CDCl<sub>3</sub>) δ 136.9, 136.3, 134.0, 130.1, 128.1, 127.6, 126.3, 116.8, 37.2, 32.1.

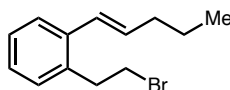

**(E)-1-(bromomethyl)-2-(pent-1-en-1-yl)benzene (3b):** Prepared following general procedure C using 1-pentyne (500 μL, 5 mmol, 1 equiv) and ((2-bromobenzyl)oxy)(*tert*-

butyl)dimethylsilane (1.50 g, 5 mmol, 1 equiv) to provide the corresponding phenethyl alcohol (780 mg, 4.1 mmol), which was converted to the bromide using CBr<sub>4</sub> (1.63 g, 4.9 mmol, 1.2 equiv) and triphenylphosphine (1.18 g, 4.5 mmol, 1.1 equiv). The residue was purified by column chromatography, eluting with a gradient of 0 – 3% EtOAc in hexanes to provide the title compound as a colorless oil. **Yield:** 760 mg, 60%. **<sup>1</sup>H NMR** (500 MHz, CDCl<sub>3</sub>) δ 7.46 (d, *J* = 7.4 Hz, 1H), 7.29 – 7.11 (m, 3H), 6.60 (d, *J* = 15.5 Hz, 1H), 6.15 (dt, *J* = 15.4, 7.0 Hz, 1H), 3.60 – 3.44 (m, 2H), 3.31 – 3.16 (m, 2H), 2.32 – 2.19 (m, 2H), 1.64 – 1.44 (m, 2H), 0.99 (t, *J* = 7.4 Hz, 3H). **<sup>13</sup>C NMR** (126 MHz, CDCl<sub>3</sub>) δ 137.1, 135.7, 134.0, 130.0, 127.5, 127.2, 126.8, 126.5, 37.3, 35.5, 32.1, 22.7, 13.9. **IR** (thin film) 2957, 1454, 1210, 963, 748, 647 cm<sup>-1</sup>. **HRMS** (*m/z*, DART-TOF, +ve) Calcd. for [C<sub>13</sub>H<sub>17</sub>Br + NH<sub>4</sub>]<sup>+</sup>: 270.0853. Found: 270.0854.

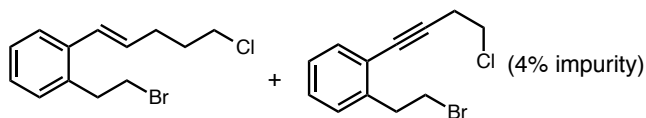

**(E)-1-(2-bromoethyl)-2-(5-chloropent-1-en-1-yl)benzene (3c):** Prepared following general procedure C using 5-chloro-1-pentyne (501 mg, 5 mmol, 1 equiv) and ((2-bromobenzyl)oxy)(*tert*-butyl)dimethylsilane (1.50 g, 5 mmol, 1 equiv) to provide the phenethyl alcohol (675 mg, 90% purity), which was converted to the bromide using CBr<sub>4</sub> (1.29 g, 3.9 mmol, ~1.3 equiv) and triphenylphosphine (1.02 g, 3.9 mmol, ~1.3 equiv). The residue was purified by column chromatography, eluting with a gradient of 0 – 3% EtOAc in hexanes to provide the title compound as a colorless oil, which contained 4% of the corresponding alkyne as an impurity. **Yield:** 510 mg, 34%. **<sup>1</sup>H NMR** (500 MHz, CDCl<sub>3</sub>) δ 7.44 (dd, *J* = 7.4, 1.5 Hz, 1H), 7.26 – 7.14 (m, 3H), 6.66 (d, *J* = 15.5 Hz, 1H), 6.08 (dt, *J* = 15.5, 7.1 Hz, 1H), 3.61 (t, *J* = 6.5 Hz, 2H), 3.55 – 3.46 (m, 2H), 3.27 – 3.20 (m, 2H), 2.47 – 2.39 (m, 2H), 2.03 – 1.92 (m, 2H). **<sup>13</sup>C NMR** (126 MHz, CDCl<sub>3</sub>) δ 136.8, 136.0, 131.8, 130.2, 128.3, 127.6, 126.6, 44.6, 37.3, 32.3, 32.2, 30.6. **IR** (thin film) 2955, 1483, 1440, 1302, 1261, 1210, 964, 749 cm<sup>-1</sup>. **HRMS** (*m/z*, DART-TOF, +ve) Calcd. for [C<sub>13</sub>H<sub>16</sub>BrCl + NH<sub>4</sub>]<sup>+</sup>: 306.0446. Found: 306.0446.

### Experimental procedures and characterization of 1o – 1r:

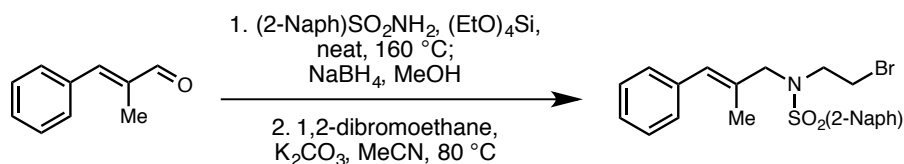

**(E)-N-(2-bromoethyl)-N-(2-methyl-3-phenylallyl)naphthalene-2-sulfonamide (1o):** *Step 1:* A pressure tube (30 mL) was charged with *trans*-α-methylcinnamaldehyde (3.22 g, 22 mmol, 1.1 equiv) and 2-naphthalenesulfonamide (4.10 g, 20 mmol, 1.0 equiv) and tetraethyl orthosilicate (20 mL), flushed with nitrogen, and sealed. Behind a blast shield, the reaction mixture was stirred at 160 °C for 16 h. The reaction mixture was allowed to cool to room temperature and the crude sulfonimide was taken up in MeOH (50 mL) and cooled to 0 °C with stirring. Sodium borohydride (0.91 g, 24 mmol, 1.2 equiv) was added portionwise over 2 min to the stirred reaction mixture. The reaction mixture was allowed to warm to room temperature and stirred for 30 min before it was partitioned

between CH<sub>2</sub>Cl<sub>2</sub> (250 mL) and water (250 mL). The aqueous phase was extracted with CH<sub>2</sub>Cl<sub>2</sub> (100 mL), and the combined organic layers were dried (Na<sub>2</sub>SO<sub>4</sub>) and concentrated to afford the crude product as a brown solid. The crude material was recrystallized (hexanes/acetone) to afford the secondary sulfonamide as a beige solid (3.93 g, 11.6 mmol).

*Step 2:* A round-bottom flask was charged with the secondary sulfonamide obtained above (1.25 g, 3.71 mmol, 1.0 equiv) and K<sub>2</sub>CO<sub>3</sub> (1.54 g, 11.2 mmol, 3.0 equiv). MeCN (50 mL) and 1,2-dibromoethane (3.7 mL) were added, and the reaction mixture was vigorously stirred under reflux for 24 h. After cooling to room temperature, the reaction mixture was filtered (CH<sub>2</sub>Cl<sub>2</sub>) through a medium-porosity sintered funnel, and the filtrate was concentrated to afford the crude product, which was purified by flash column chromatography (6:1 hexanes/EtOAc) to deliver the title compound as a colorless solid, **m.p.** 110 – 111 °C.

**Yield:** 1.33 g, 47% over 2 steps. <sup>1</sup>H NMR (600 MHz, CDCl<sub>3</sub>) δ 8.45 (s, 1H), 8.04 – 7.97 (m, 2H), 7.94 (d, *J* = 8.0 Hz, 1H), 7.83 (dd, *J* = 8.7, 1.5 Hz, 1H), 7.67 (dt, *J* = 14.8, 7.1 Hz, 2H), 7.34 (t, *J* = 7.6 Hz, 2H), 7.30 – 7.17 (m, 3H), 6.41 (s, 1H), 3.94 (s, 2H), 3.62 – 3.41 (m, 4H), 1.90 (s, 3H). <sup>13</sup>C NMR (151 MHz, CDCl<sub>3</sub>) δ 136.9, 136.2, 135.0, 133.2, 132.4, 130.0, 129.8, 129.4, 129.1, 129.0, 128.7, 128.4, 128.1, 127.9, 127.2, 122.5, 58.5, 49.9, 29.2, 15.9. IR (thin film) 1347, 1336, 1155, 1074, 747, 699, 650, 615 cm<sup>-1</sup>. EA Calcd. for C<sub>22</sub>H<sub>22</sub>BrNO<sub>2</sub>S: C 59.46; H, 4.99. Found: C, 59.59; H, 4.96.

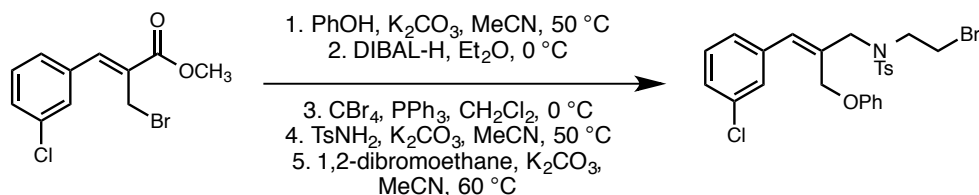

**(Z)-N-(2-bromoethyl)-N-(3-(3-chlorophenyl)-2-(phenoxy)methyl)allyl-4-methylbenzenesulfonamide (1p):**

*Step 1:* A round-bottom flask (250 mL) was charged with methyl (Z)-2-(bromomethyl)-3-(3-chlorophenyl)acrylate (5.79 g, 20 mmol, 1.0 equiv), phenol (1.85 g, 20 mmol, 1.0 equiv), and MeCN (50 mL). K<sub>2</sub>CO<sub>3</sub> (5.52 g, 40 mmol, 2.0 equiv) was added, and the reaction mixture was stirred vigorously at 50 °C for 14 h. After cooling to room temperature, the reaction mixture was filtered (CH<sub>2</sub>Cl<sub>2</sub>) through a medium porosity sintered funnel, and the filtrate was concentrated to give the crude phenyl ether as a yellow oil, which was used without further purification.

*Step 2:* The crude phenyl ether obtained above was dissolved in anhydrous Et<sub>2</sub>O (50 mL) and cooled to 0 °C. DIBAL-H (1.0 M in toluene, 50 mL, 50 mmol) was added dropwise, and the reaction mixture was allowed to warm to room temperature and stirred for 1 h. Na<sub>2</sub>SO<sub>4</sub> (sat.) was carefully added with continued stirring until a solid precipitated, and the supernatant liquid became clear. The solid material was removed by filtration through a sintered funnel, and the filtrate was concentrated to provide the crude product, which was partially purified (~90% purity) by column chromatography to afford the allylic alcohol (2.40 g) as a colorless oil.

*Step 3:* The allylic alcohol obtained above was dissolved in anhydrous CH<sub>2</sub>Cl<sub>2</sub> (50 mL) and cooled to 0 °C. CBr<sub>4</sub> (3.19 g, 9.6 mmol, ~1.1 equiv) and triphenylphosphine (2.40 g, 9.2 mmol, ~1.05 equiv) were added sequentially. The reaction mixture was stirred for 30



min at 0 °C, whereupon it was concentrated and filtered through a plug of silica gel (10% EtOAc in hexanes) to afford the allylic bromide, which was used without further purification.

*Step 4:* The crude allylic bromide obtained above was taken up in MeCN (25 mL), and *p*-toluenesulfonamide (2.99 g, 17 mmol) and K<sub>2</sub>CO<sub>3</sub> (3.61 g, 26 mmol) were added. The reaction mixture was stirred vigorously at 50 °C for 12 h. Upon cooling to room temperature, the reaction mixture was filtered through a sintered funnel, and the filtrate was concentrated to afford the crude product, which was purified by column chromatography (5:1 to 4:1 hexanes/EtOAc) to afford the desired secondary sulfonamide as a colorless solid (1.63 g, 3.8 mmol).

*Step 5:* A round-bottom flask was charged with a portion (856 mg, 2.0 mmol, 1.0 equiv) of the secondary sulfonamide obtained above and K<sub>2</sub>CO<sub>3</sub> (828 mg, 6.0 mmol, 3.0 equiv). MeCN (10 mL) and 1,2-dibromoethane (2 mL) were added, and the reaction mixture was stirred vigorously under reflux for 24 h. After cooling to room temperature, the reaction mixture was filtered (CH<sub>2</sub>Cl<sub>2</sub>) through a medium-porosity sintered funnel, and the filtrate was concentrated to afford the crude product, which was purified by column chromatography (9:1 hexanes/EtOAc) to deliver the title compound as an off-white solid, **m.p.** 69 – 71 °C.

**Yield:** 745 mg, 13% over 5 steps. <sup>1</sup>H NMR (600 MHz, CDCl<sub>3</sub>) δ 7.71 (d, *J* = 8.2 Hz, 2H), 7.33 – 7.21 (m, 6H), 7.16 (s, 1H), 7.13 – 7.09 (m, 1H), 6.99 (t, *J* = 7.3 Hz, 1H), 6.81 (d, *J* = 7.8 Hz, 2H), 6.69 (s, 1H), 4.45 (s, 2H), 4.09 (s, 2H), 3.63 – 3.50 (m, 4H), 2.40 (s, 3H). <sup>13</sup>C NMR (151 MHz, CDCl<sub>3</sub>) δ 158.1, 144.0, 137.4, 136.3, 134.5, 133.7, 133.0, 130.0, 129.9, 129.7, 129.0, 128.1, 127.4, 127.0, 121.5, 114.9, 64.0, 53.5, 50.2, 29.4, 21.7. **IR** (thin film) 1596, 1494, 1338, 1231, 1155, 1090, 752, 724, 689, 662 cm<sup>-1</sup>. **EA** Calcd. for C<sub>25</sub>H<sub>25</sub>BrClNO<sub>3</sub>S: C 56.14; H, 4.71. Found: C, 56.14; H, 4.71.

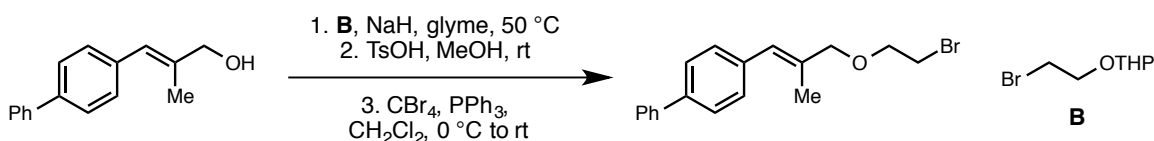

**(E)-4-(3-(2-bromoethoxy)-2-methylprop-1-en-1-yl)-1,1'-biphenyl (1q):**

*Step 1:* A solution of (*E*)-3-([1,1'-biphenyl]-4-yl)-2-methylprop-2-en-1-ol (2.24 g, 10 mmol, 1.0 equiv) in glyme (5 mL) was dropwise to a suspension of NaH (95%, 288 mg, 12 mmol, 1.2 equiv) in glyme (20 mL) at room temperature under argon. The reaction mixture was stirred for 1 h at room temperature before **B** (2.51 g, 12 mmol, 1.2 equiv) was added. The reaction mixture was then stirred at 50 °C for 24 h. Another aliquot of **B** (2.51 g, 12 mmol, 1.2 equiv) was added, and the reaction mixture was stirred for an additional 24 h. Upon cooling to room temperature, the reaction mixture was partitioned between water (50 mL) and EtOAc (50 mL). The aqueous layer was extracted with ethyl acetate (2 × 50 mL), and the combined organic layers were dried (Na<sub>2</sub>SO<sub>4</sub>), concentrated, and partially purified (~85% purity) by column chromatography to afford the desired tetrahydropyran ether.

*Step 2:* The tetrahydropyran ether obtained above was taken up in MeOH (100 mL) and *p*-TsOH (100 mg) was added. After stirring for 15 min at room temperature, the reaction mixture was quenched with sat. NaHCO<sub>3</sub> (100 mL) and partitioned between water (200 mL) and EtOAc (200 mL). The aqueous layer was extracted with EtOAc (3 × 100 mL), and the combined organic layers were dried (Na<sub>2</sub>SO<sub>4</sub>) and concentrated. The crude

product was purified by column chromatography to afford the desired alcohol (1.30 g, 4.9 mmol) as a colorless solid.

*Step 3:* A portion (1.02 g, 3.81 mmol, 1.0 equiv) of the alcohol prepared above was dissolved in anhydrous CH<sub>2</sub>Cl<sub>2</sub> (20 mL) and cooled to 0 °C. CBr<sub>4</sub> (1.52 g, 4.6 mmol, 1.2 equiv) and triphenylphosphine (1.10 g, 4.2 mmol, 1.1 equiv) were added sequentially. The reaction mixture was allowed to warm to room temperature and stirred at room temperature for 30 min and concentrated. The resultant oil was purified directly by column chromatography (hexanes to 15:1 hexanes/EtOAc) to afford the title compound as a colorless oil.

**Yield:** 981 mg, 34% over 3 steps. <sup>1</sup>H NMR (600 MHz, CDCl<sub>3</sub>) δ 7.67 – 7.54 (m, 4H), 7.45 (t, *J* = 7.7 Hz, 2H), 7.42 – 7.32 (m, 3H), 6.56 (s, 1H), 4.13 (s, 2H), 3.81 (t, *J* = 6.1 Hz, 2H), 3.54 (t, *J* = 6.1 Hz, 2H), 1.97 (s, 3H). <sup>13</sup>C NMR (151 MHz, CDCl<sub>3</sub>) δ 140.9, 139.5, 136.5, 135.1, 129.5, 128.9, 127.4, 127.2, 127.1, 127.0, 77.5, 69.8, 30.8, 15.7. IR (thin film) 1485, 1105, 1007, 871, 762, 738, 696 cm<sup>-1</sup>. EA Calcd. for C<sub>18</sub>H<sub>19</sub>BrO: C 65.27; H, 5.78. Found: C, 64.97; H, 5.70.

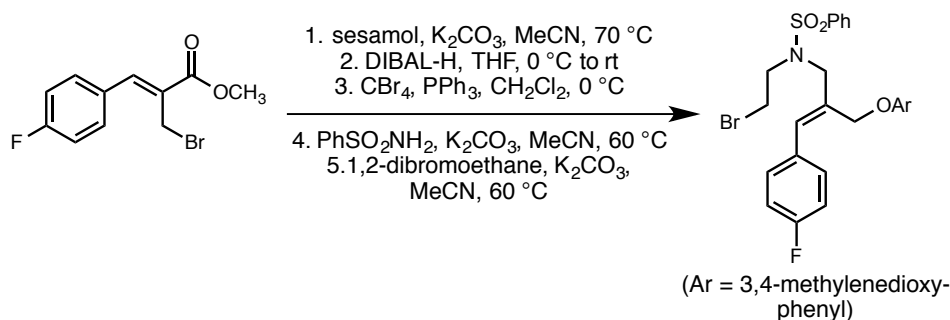

**(Z)-N-(2-((benzo[*d*][1,3]dioxol-5-yloxy)methyl)-3-(4-fluorophenyl)allyl)-N-(2-bromoethyl)benzenesulfonamide (1r):**

*Step 1:* To a solution of methyl (Z)-4-(bromomethyl)-3-(4-fluorophenyl)-2-propenoate (9.55 g, 35 mmol, 1.0 equiv) and sesamol (4.83 g, 35 mmol, 1.0 equiv) in MeCN (100 mL) was added K<sub>2</sub>CO<sub>3</sub> (9.66 g, 70 mmol, 2.0 equiv). The reaction mixture was stirred vigorously at 70 °C for 9 h. Upon cooling to room temperature, the reaction mixture was filtered through a sintered funnel (CH<sub>2</sub>Cl<sub>2</sub>) and concentrated to provide the desired allylic ether, which was used in the next step without further purification.

*Step 2:* The crude allylic ether obtained above was dissolved in anhydrous THF (100 mL) and cooled to 0 °C. DIBAL-H (1.0 M in cyclohexane, 70 mL, 70 mmol) was added dropwise, and the reaction mixture was stirred for 10 min at room temperature. Na<sub>2</sub>SO<sub>4</sub> (sat.) was carefully added with continued stirring until a solid precipitated, and the supernatant liquid became clear. The solid material was removed by filtration through a sintered funnel, and the filtrate was concentrated to provide the crude product, which was purified by recrystallization (hexanes/toluene) to provide the desired allylic alcohol as a colorless solid (4.03 g, 13.3 mmol).

*Step 3:* The allylic alcohol obtained above was dissolved in anhydrous CH<sub>2</sub>Cl<sub>2</sub> (100 mL) and cooled to 0 °C. CBr<sub>4</sub> (5.30 g, 16.0 mmol, 1.2 equiv) and triphenylphosphine (3.83 g, 14.3 mmol, 1.1 equiv) were added sequentially. The reaction mixture was stirred for 30 min at 0 °C, whereupon it was concentrated and filtered through a plug of silica gel (10% EtOAc in hexanes) to afford the desired allylic bromide, which was used without further purification.

*Step 4:* The crude allylic bromide obtained above was taken up in MeCN (100 mL), and benzenesulfonamide (3.70 g, 23.6 mmol) and K<sub>2</sub>CO<sub>3</sub> (6.5 g, 47 mmol) were added. The reaction mixture was stirred vigorously at 50 °C for 12 h. Additional benzenesulfonamide (1.23 g, 7.8 mmol) was added, and the reaction mixture was stirred at 60 °C for a further 24 h. Upon cooling to room temperature, the reaction mixture was filtered through a sintered funnel, and the filtrate was concentrated to afford the crude product, which was purified by column chromatography (6:1 hexanes/EtOAc) to afford the desired secondary sulfonamide as a yellow solid (2.30 g, 3.8 mmol).

*Step 5:* A round-bottom flask was charged with a portion (481 mg, 1.10 mmol, 1.0 equiv) of the secondary sulfonamide obtained above and K<sub>2</sub>CO<sub>3</sub> (500 mg, 3.6 mmol, 3.2 equiv). MeCN (5 mL) and 1,2-dibromoethane (1.1 mL) were added, and the reaction mixture was stirred vigorously at 60 °C for 24 h. After cooling to room temperature, the reaction mixture was filtered (CH<sub>2</sub>Cl<sub>2</sub>) through a medium-porosity sintered funnel, and the filtrate was concentrated to afford the crude product, which was purified by column chromatography (9:1 hexanes/EtOAc) to deliver the title compound as a viscous, pale yellow oil.

**Yield:** 433 mg, 8% over 5 steps. **<sup>1</sup>H NMR** (600 MHz, CDCl<sub>3</sub>) δ 7.83 (d, *J* = 8.3 Hz, 2H), 7.60 – 7.53 (m, 1H), 7.48 (t, *J* = 7.6 Hz, 2H), 7.19 (dd, *J* = 7.9, 5.8 Hz, 2H), 7.02 (t, *J* = 8.6 Hz, 1H), 6.72 (s, 1H), 6.68 (d, *J* = 8.4 Hz, 1H), 6.46 – 6.39 (d, *J* = 2.3 Hz, 1H), 6.22 (dd, *J* = 8.5, 2.3 Hz, 1H), 5.92 (s, 2H), 4.38 (s, 2H), 4.06 (s, 2H), 3.60 – 3.54 (m, 2H), 3.54 – 3.48 (m, 2H). **<sup>13</sup>C NMR** (151 MHz, CDCl<sub>3</sub>) δ 162.5 (d, *J*<sub>CF</sub> = 248 Hz), 153.6, 148.4, 142.3, 139.2, 133.8, 133.0, 132.1, 131.6 (d, *J*<sub>CF</sub> = 3.4 Hz), 130.7 (d, *J*<sub>CF</sub> = 8.1 Hz), 129.4, 127.3, 115.7 (d, *J*<sub>CF</sub> = 21.6 Hz), 108.1, 106.1, 101.4, 98.5, 65.0, 53.9, 50.1, 29.3. **IR** (thin film) 1507, 1485, 1179, 1158, 1090, 1038, 736 cm<sup>-1</sup>. **EA** Calcd. for C<sub>18</sub>H<sub>19</sub>BrO: C 65.27; H, 5.78. Found: C, 64.97; H, 5.70. **HRMS** (*m/z*, DART-TOF, +ve) Calcd. for [C<sub>25</sub>H<sub>23</sub>BrFNO<sub>5</sub>S + NH<sub>4</sub>]<sup>+</sup>: 565.0803. Found: 565.0818.

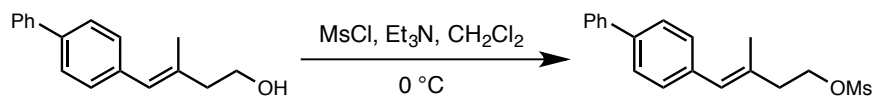

**(E)-4-([1,1'-biphenyl]-4-yl)-3-methylbut-3-en-1-yl methanesulfonate:** A solution of (E)-4-([1,1'-biphenyl]-4-yl)-3-methylbut-3-en-1-ol (1.19 g, 5 mmol) (prepared by general procedure **B**, steps 1 and 2) and triethylamine (0.83 mL, 6 mmol) in dichloromethane (25 mL) was cooled to 0 °C and methanesulfonyl chloride (0.43 mL, 5.5 mmol) was added dropwise over 1 min. The reaction mixture was stirred for an additional 30 min, and water (50 mL) was added. The organic and aqueous phases were separated and the aqueous layer was extracted with CH<sub>2</sub>Cl<sub>2</sub> (3 × 50 mL). The combined organic phases were dried (Na<sub>2</sub>SO<sub>4</sub>) and concentrated to afford the crude product, which was recrystallized (hexane/CH<sub>2</sub>Cl<sub>2</sub>) to provide the title compound as a colorless solid, **m.p.** 95 – 97 °C.

**Yield:** 1.44 g, 91%. **<sup>1</sup>H NMR** (400 MHz, CDCl<sub>3</sub>) δ 7.67 – 7.51 (m, 4H), 7.50 – 7.38 (m, 2H), 7.38 – 7.27 (m, 3H), 6.41 (s, 3H), 4.43 (t, *J* = 6.8 Hz, 2H), 3.03 (s, 3H), 2.65 (t, *J* = 6.8 Hz, 2H), 1.97 (s, 3H). **<sup>13</sup>C NMR** (151 MHz, CDCl<sub>3</sub>) δ 140.9, 139.4, 136.8, 133.4, 129.4, 128.9, 128.2, 127.4, 127.1, 127.0, 68.2, 40.2, 37.8, 18.1. **IR** (thin film) 1350, 1171, 952, 826, 804, 761, 698 cm<sup>-1</sup>.

### References for the Supporting Information:

1. Siddiqa, A.; Aziz-ur-Rehman, Abbasi, M. A.; Rasool, S.; Hussain, G.; Khan, K. M.; Ashraf, M.; Nasar, R. *Asian J. Chem.* **2014**, *26*, 93.
2. Krautwald, S.; Schafroth, M. A.; Sarlah, D.; Carreira, E. M. *J. Am. Chem. Soc.* **2014**, *136*, 3020.
3. Pan, X.; Lacôte, E.; Lalevée, J; Curran, D. P. *J. Am. Chem. Soc.* **2012**, *134*, 5669.
4. Adamczyk, M.; Watt, D. S.; Netzel, D. A. *J. Org. Chem.* **1984**, *49*, 4226.
5. Berardi, F.; Ferorelli, S.; Colabufo, N. A.; Leopoldo, M.; Perrone, R.; Tortorella, V. *Bioorg. Med. Chem.* **2001**, *9*, 1325.
6. Levy, L. A.; Sashikumar, V. P. *J. Org. Chem.* **1985**, *50*, 1760.

Copies of  $^1\text{H}$  and  $^{13}\text{C}$  NMR spectra for products (**2a – 2r**, **4a – 4c**), (-)-paroxetine and starting materials (**1a – 1r**, **3a – 3r**):

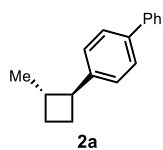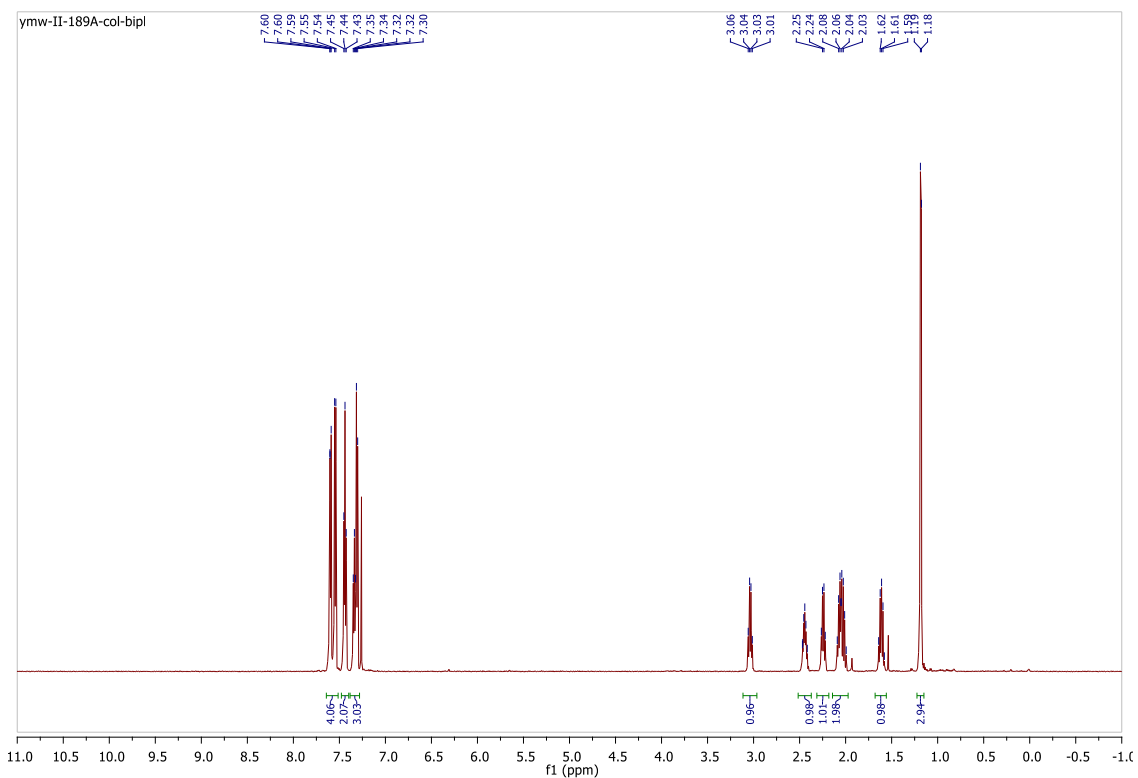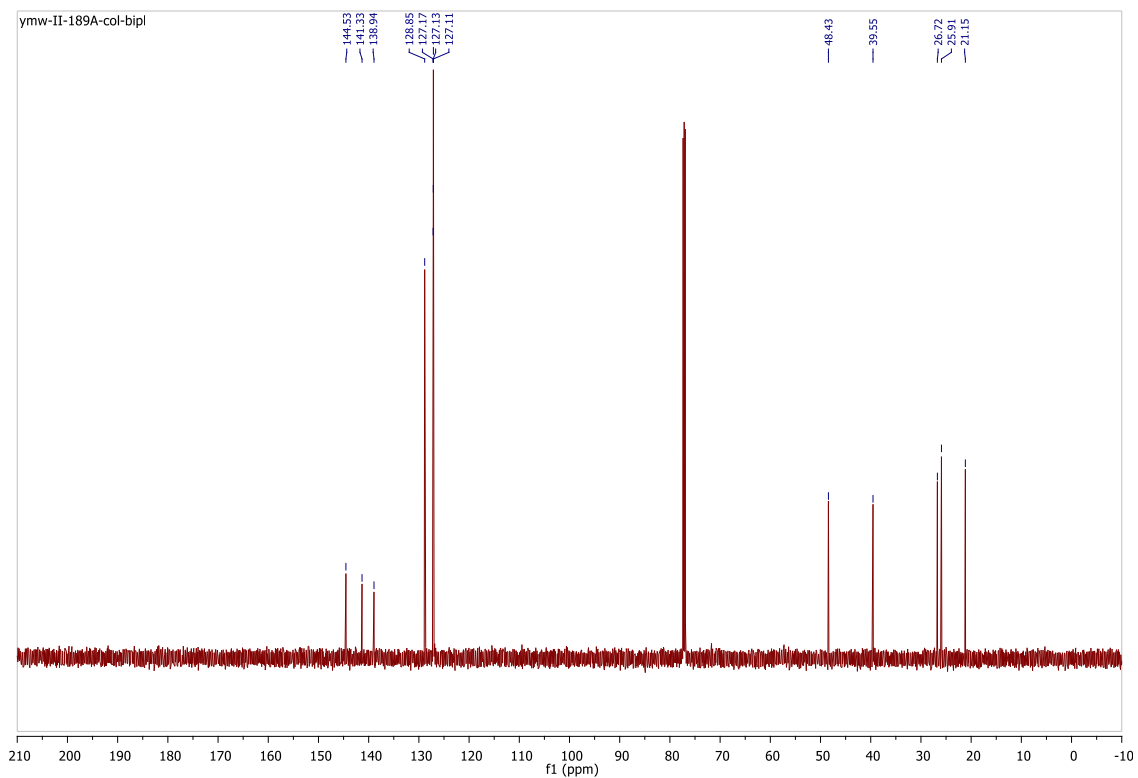

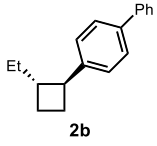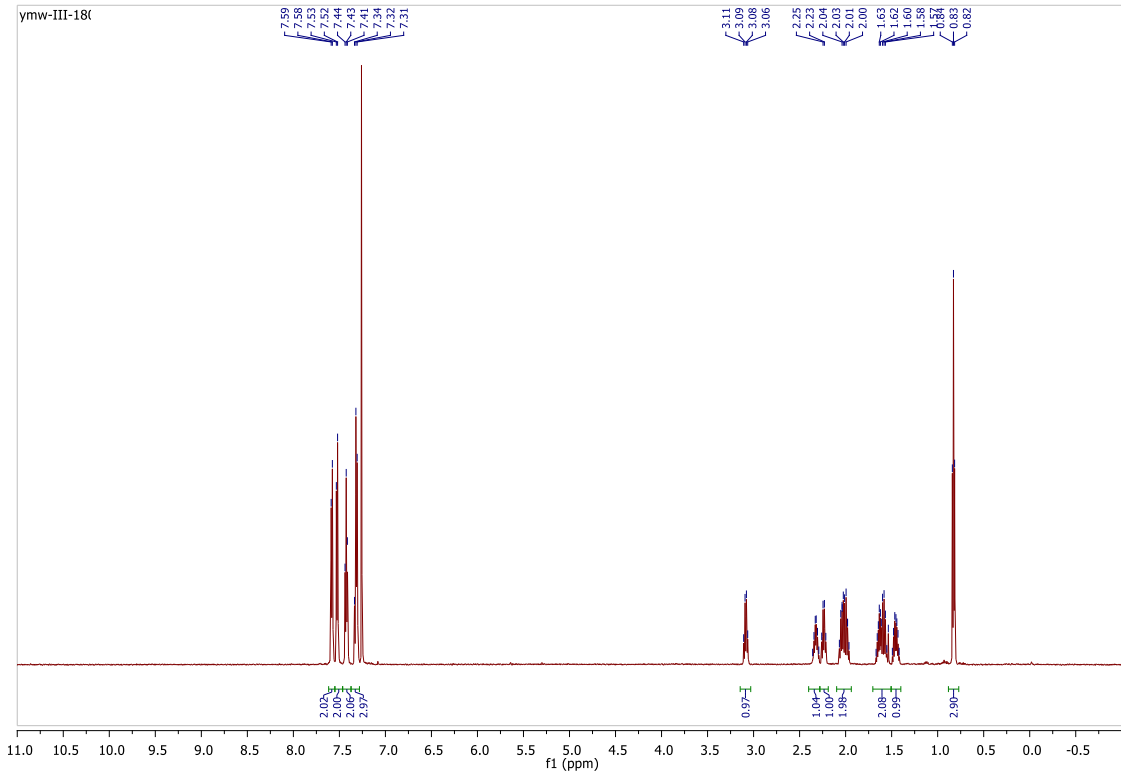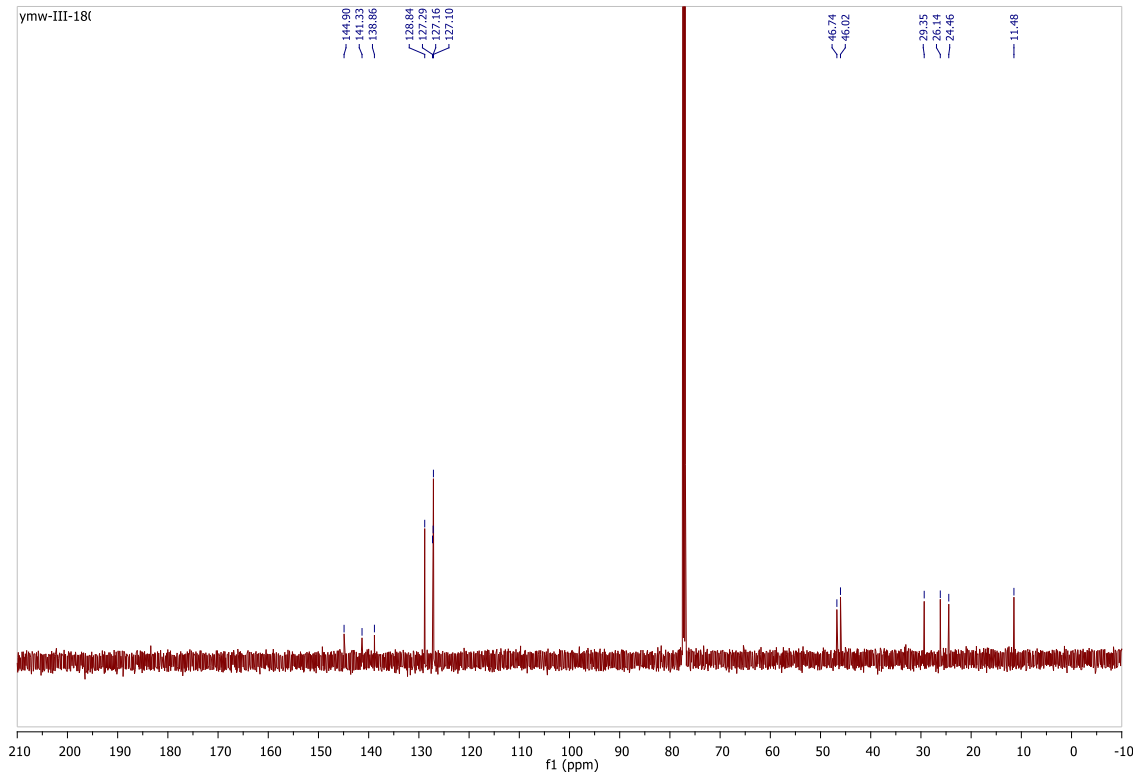

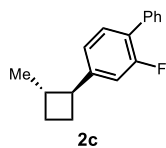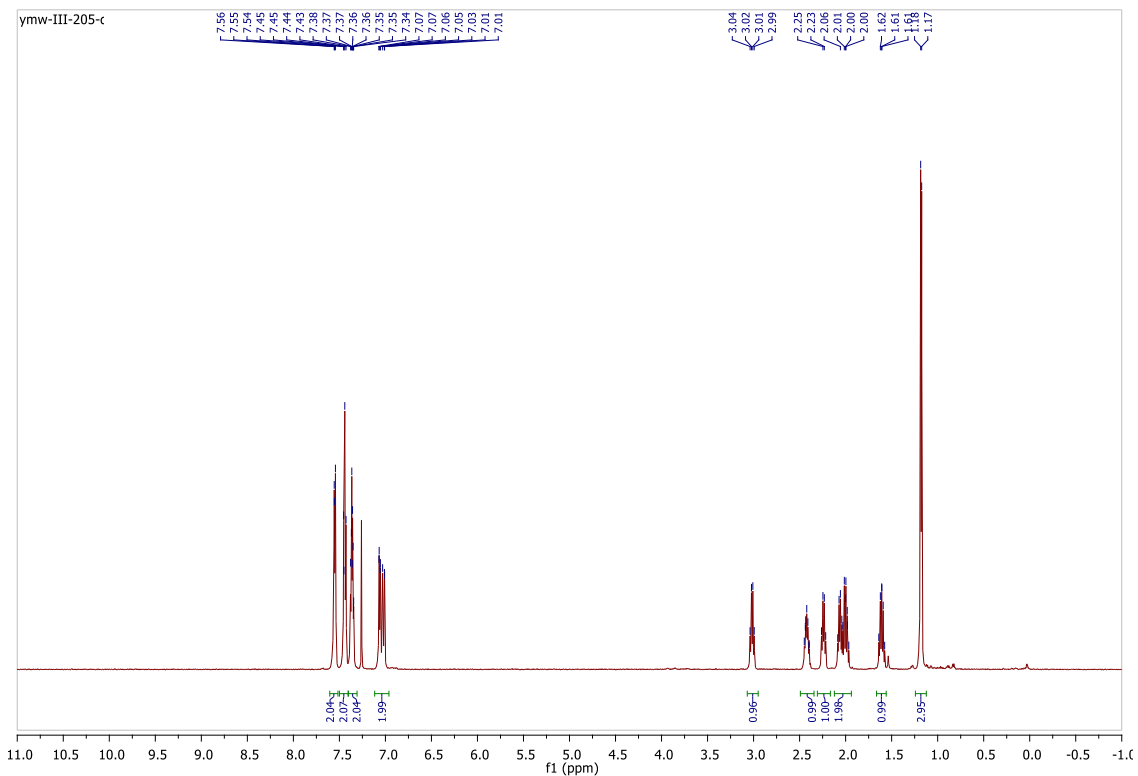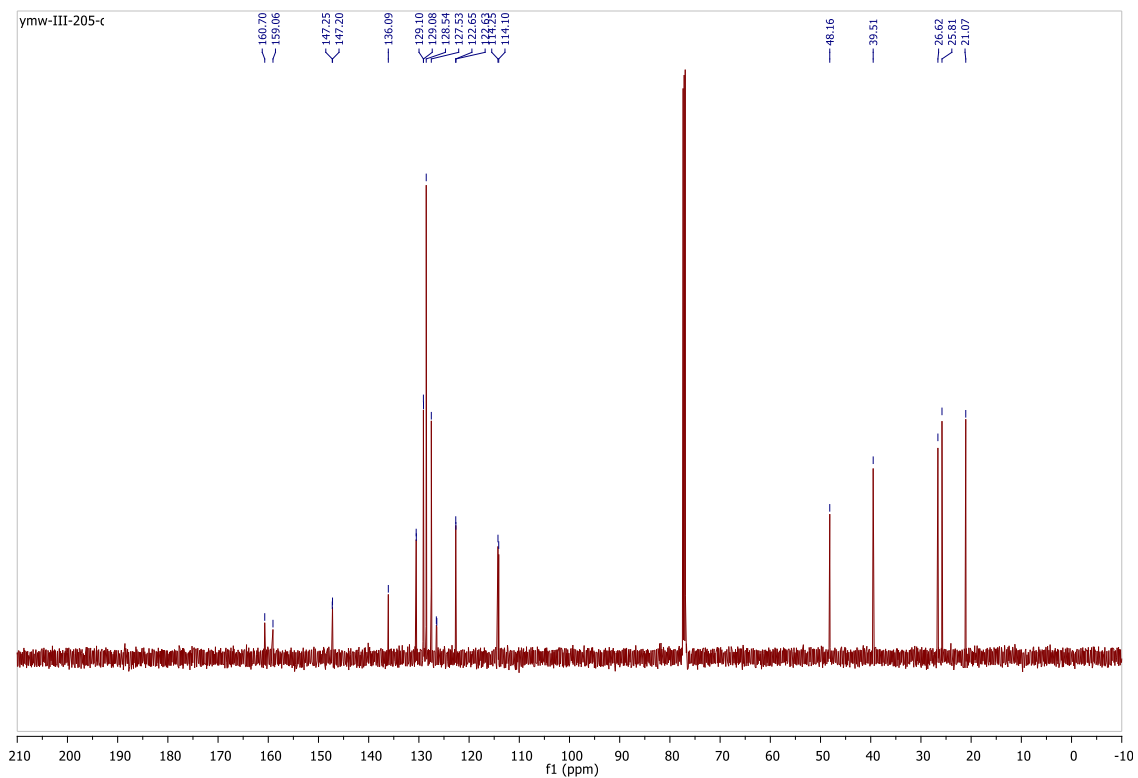



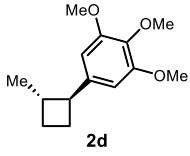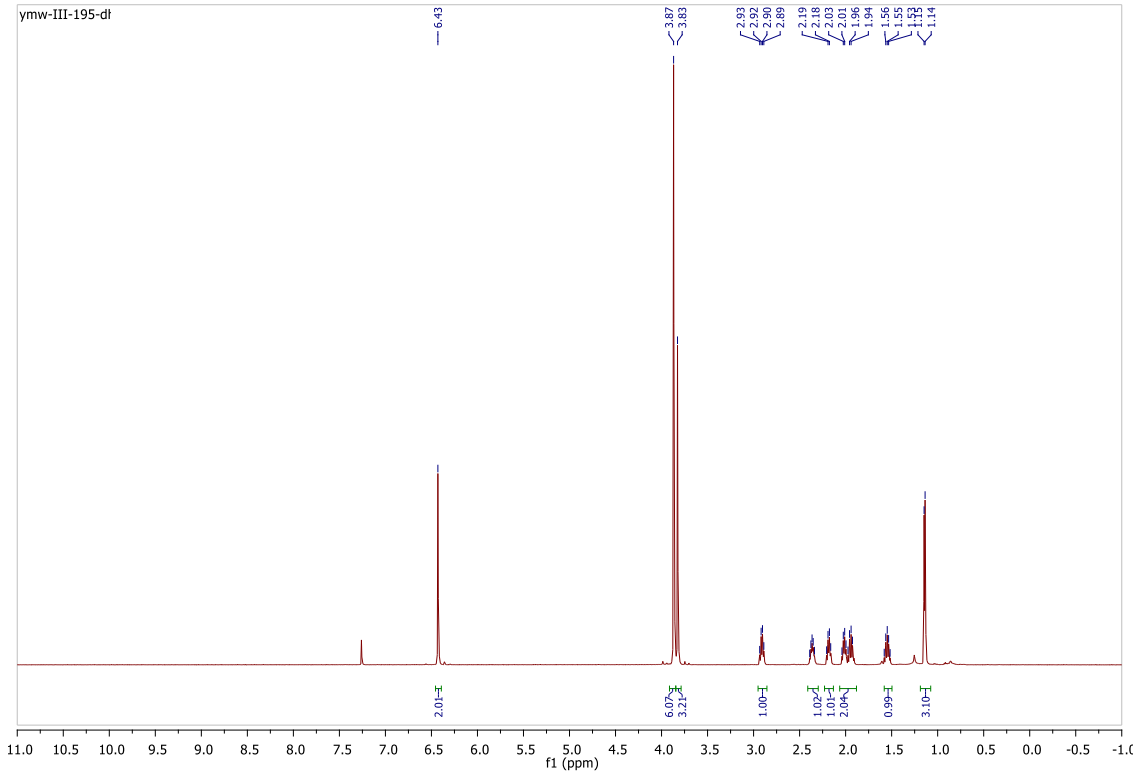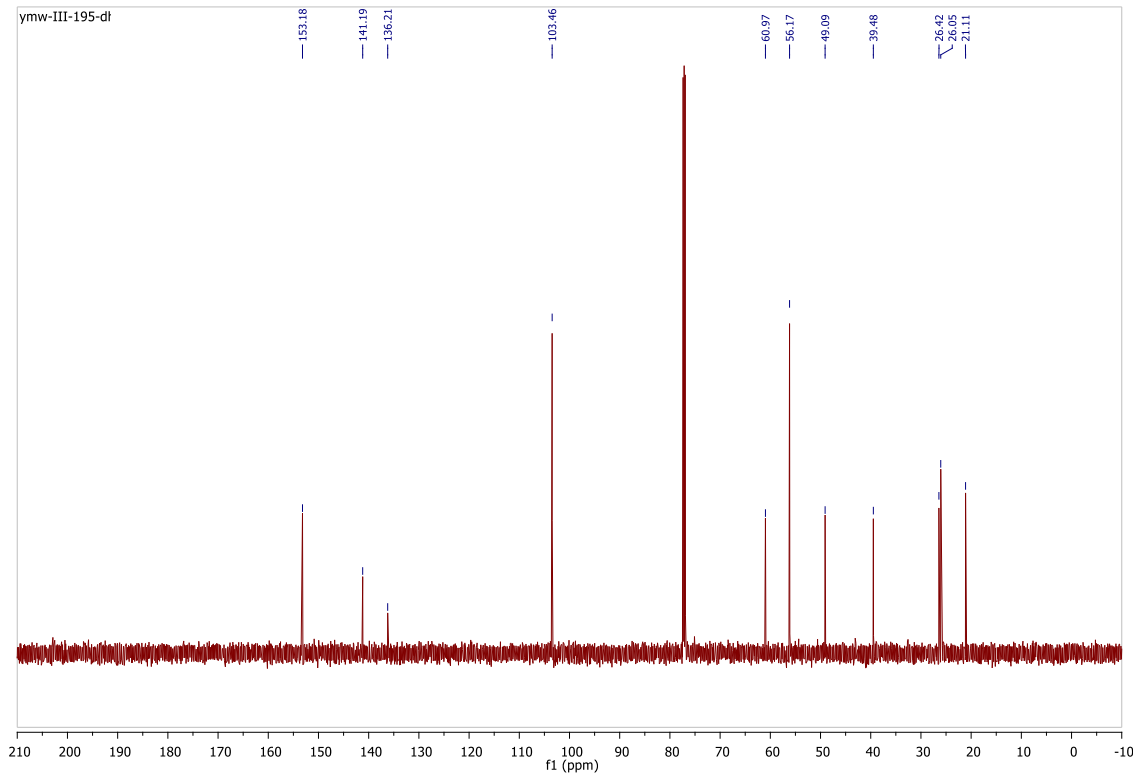

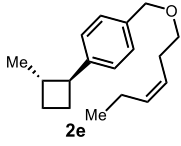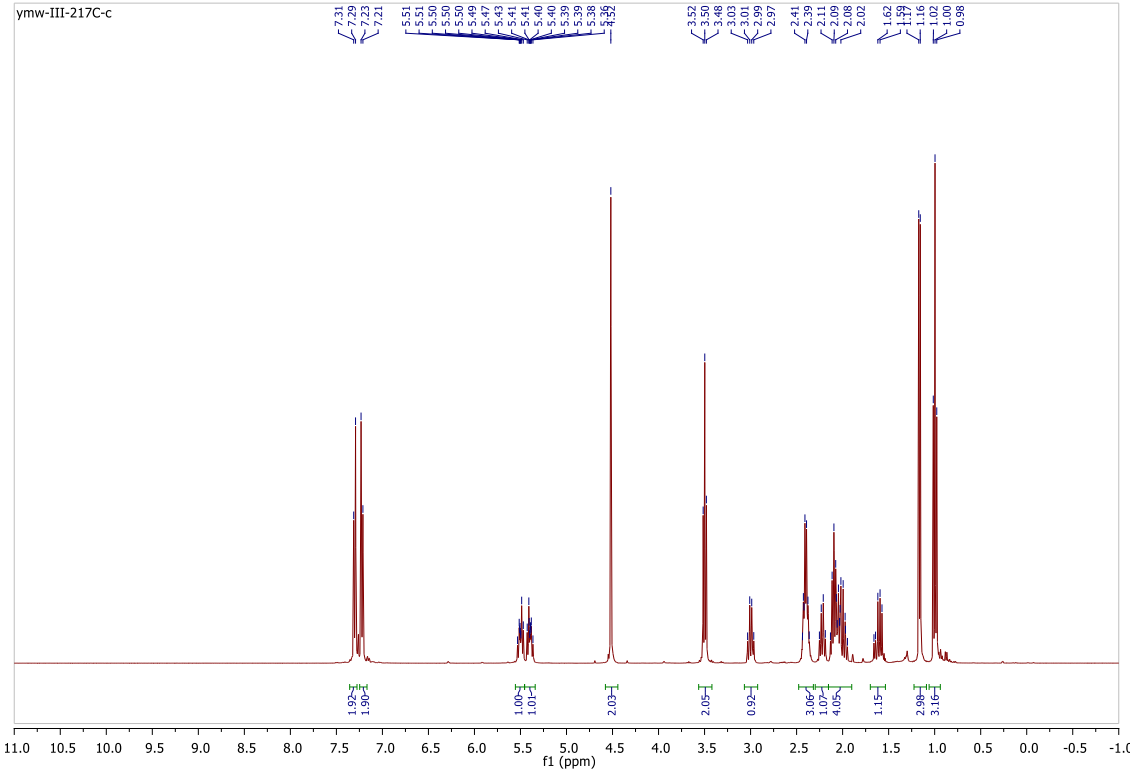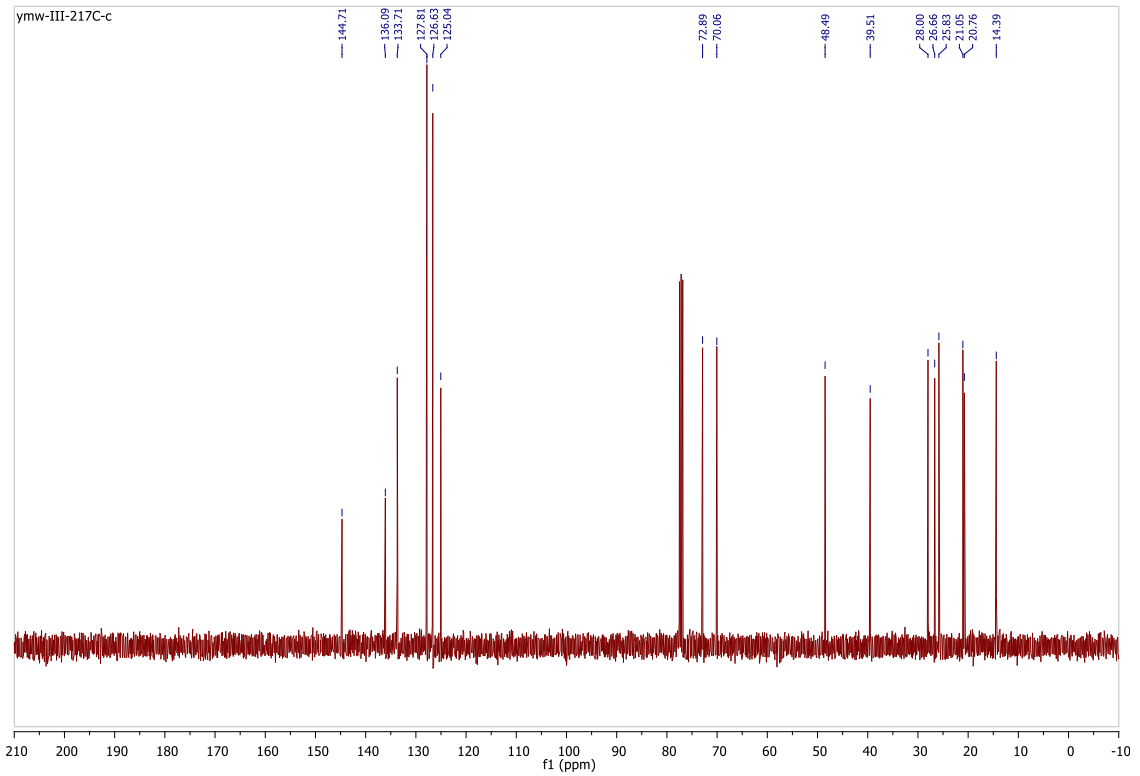

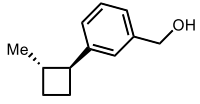

2f

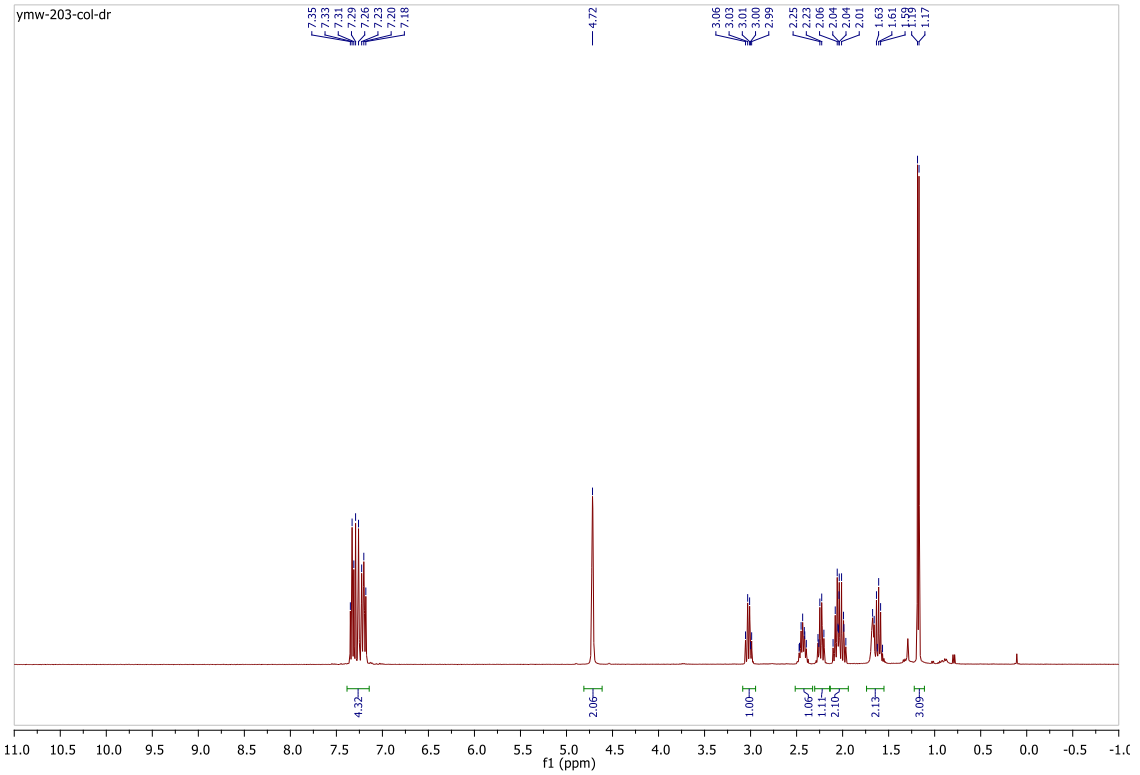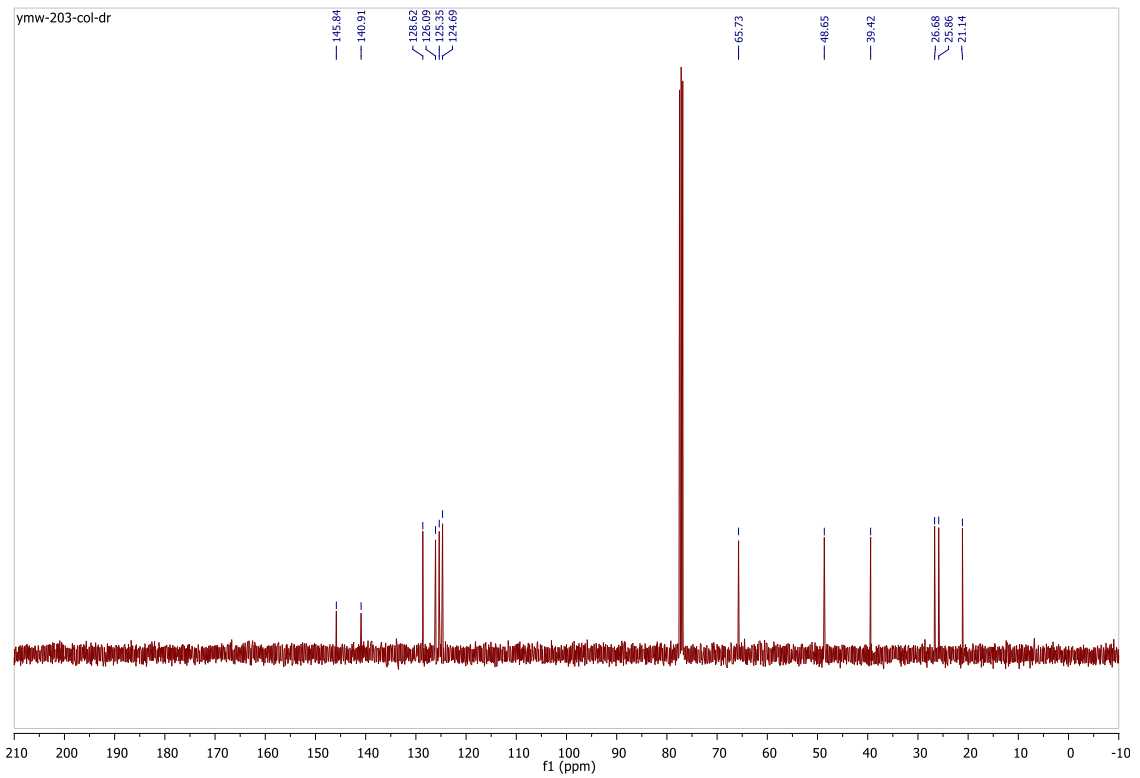

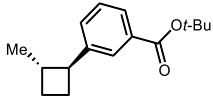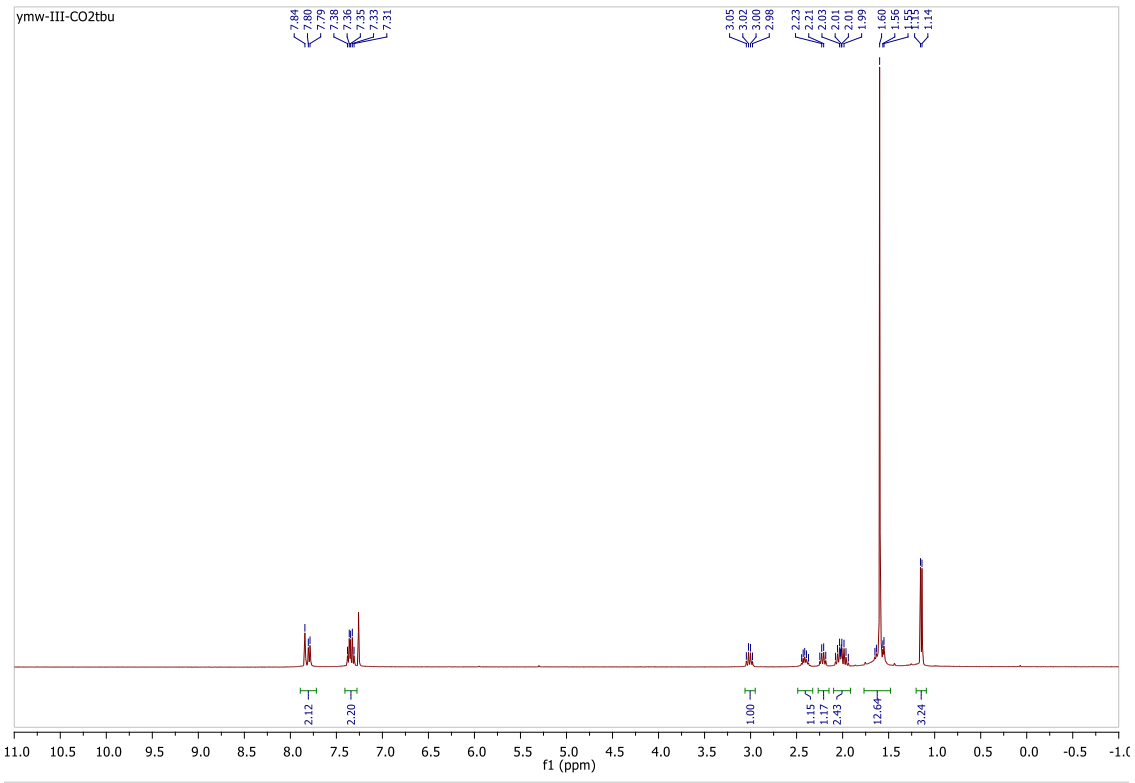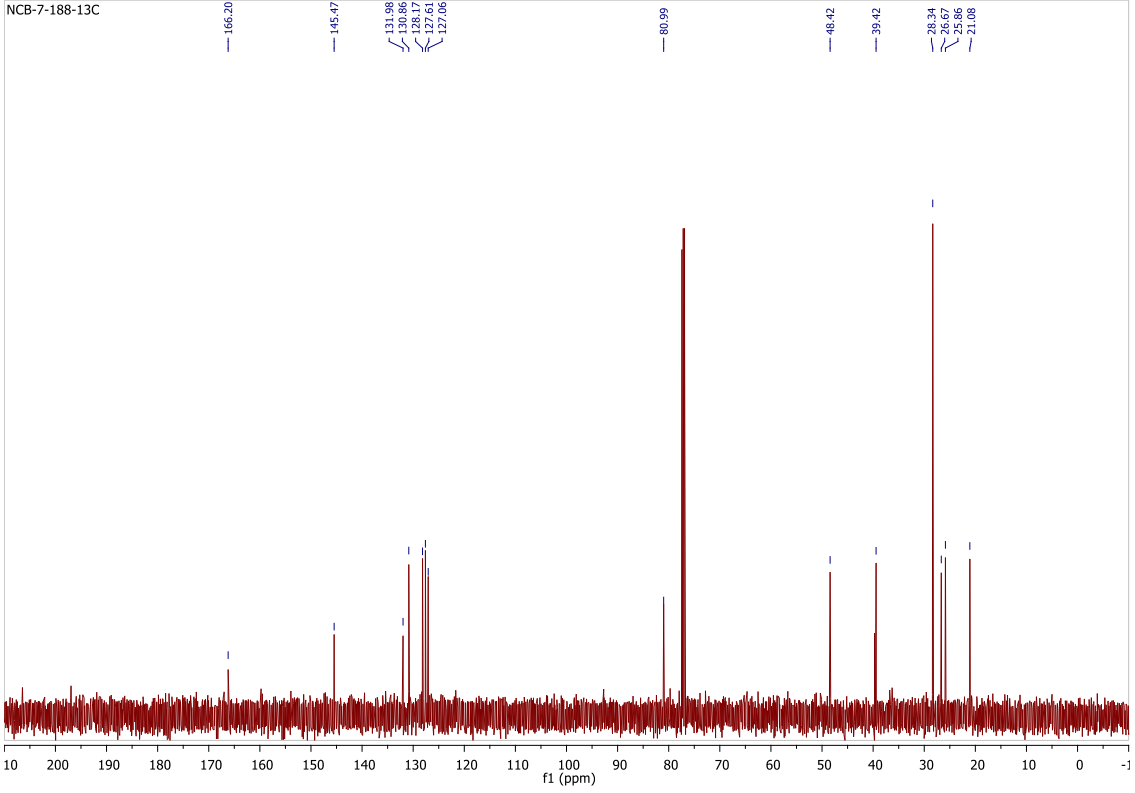

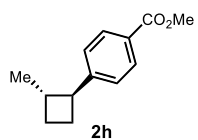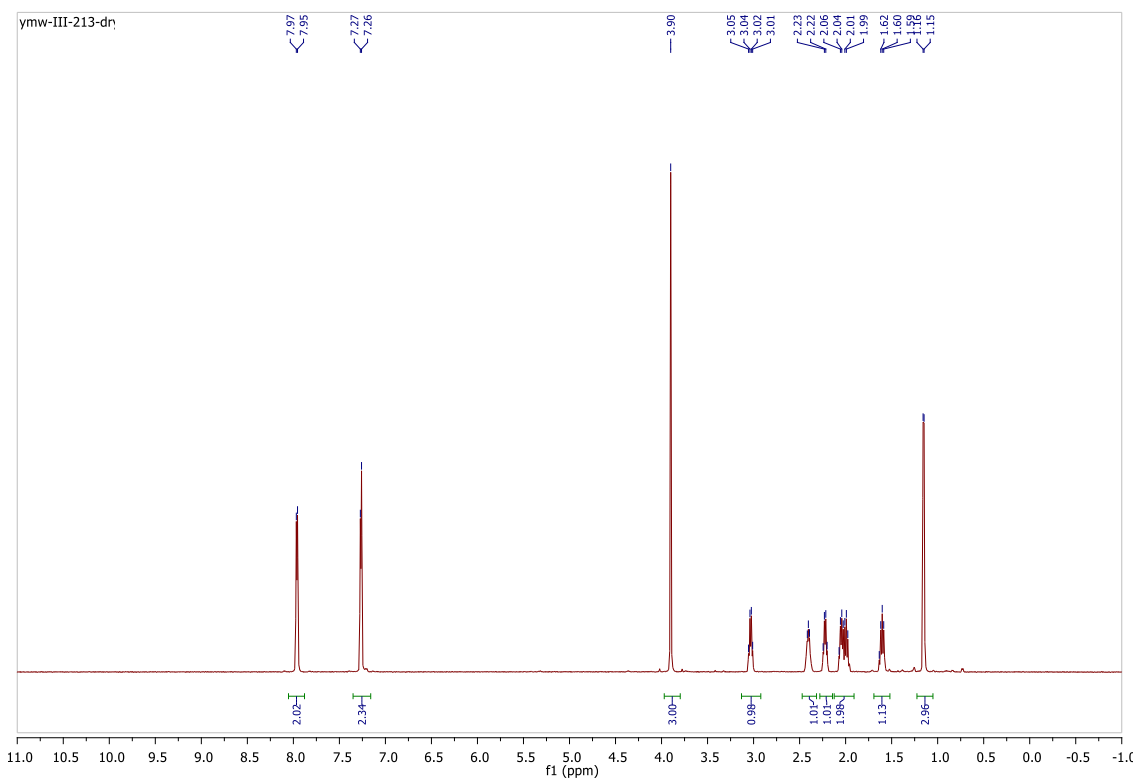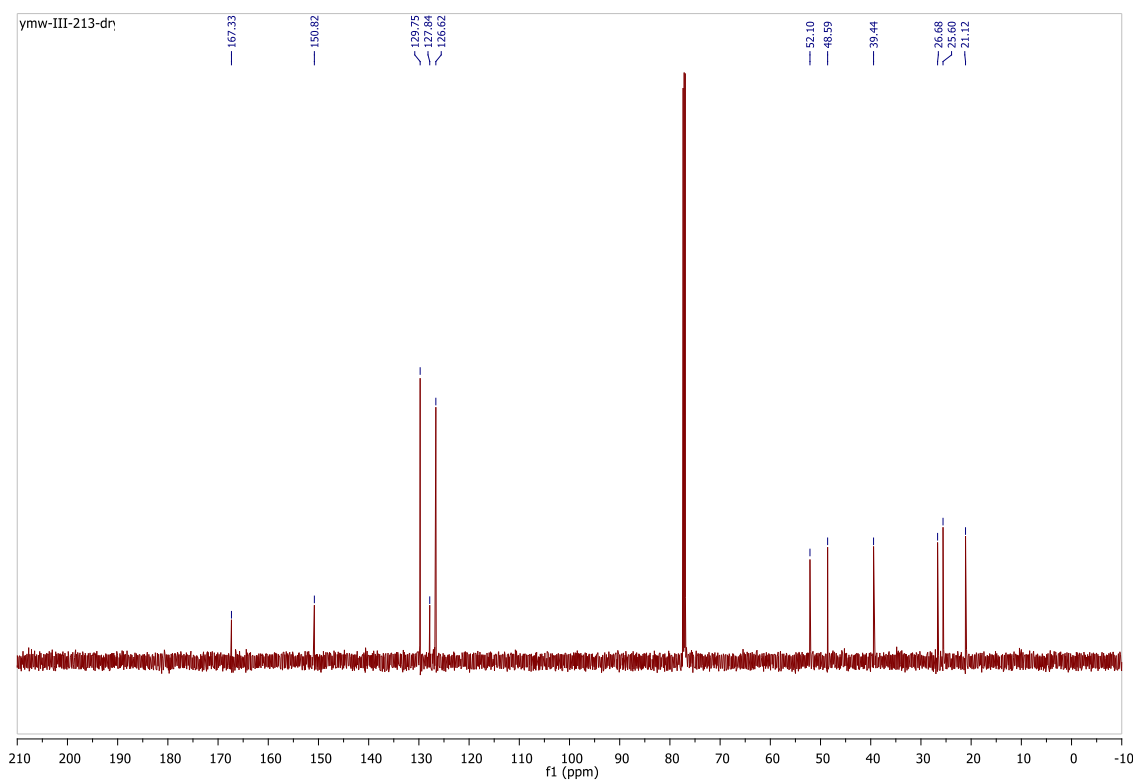

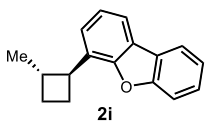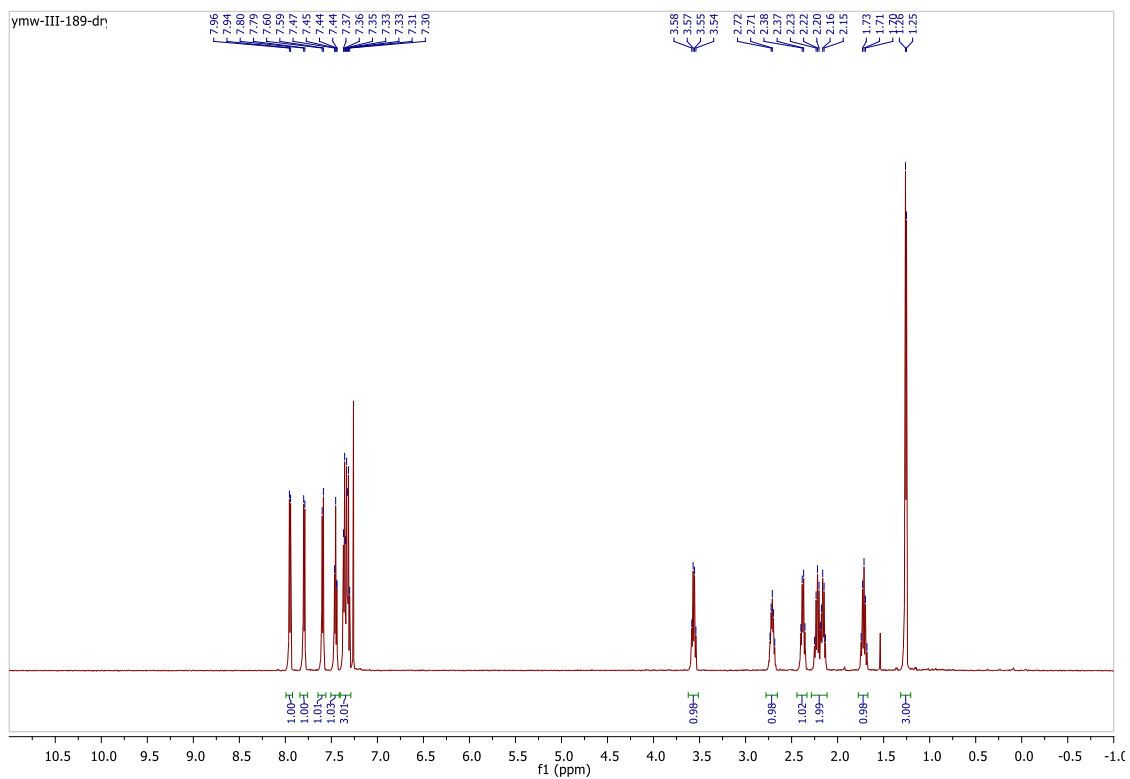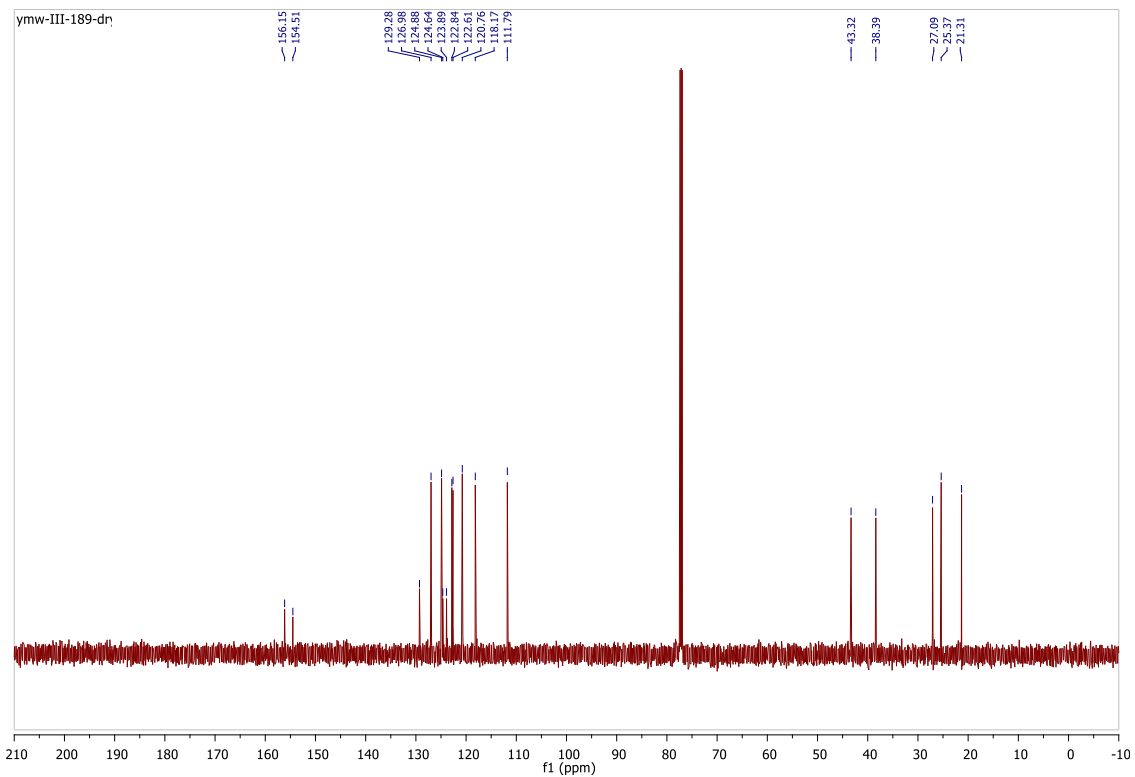

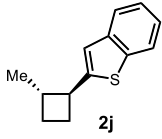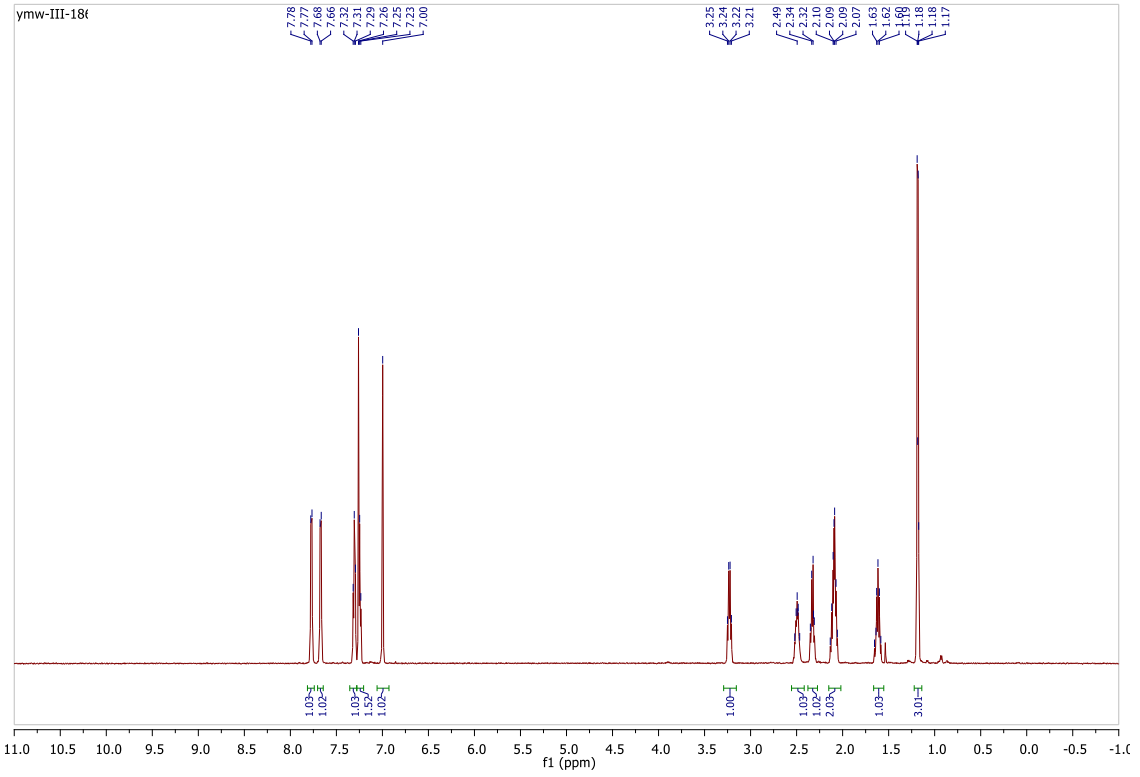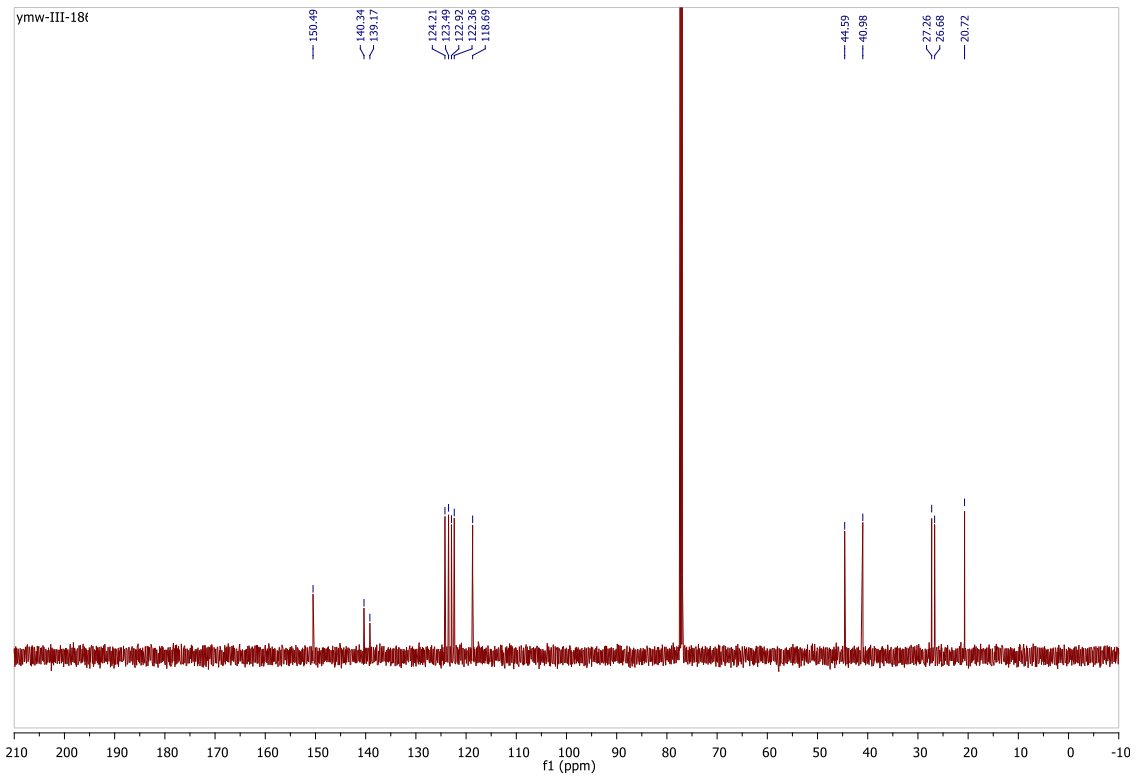

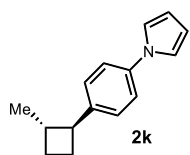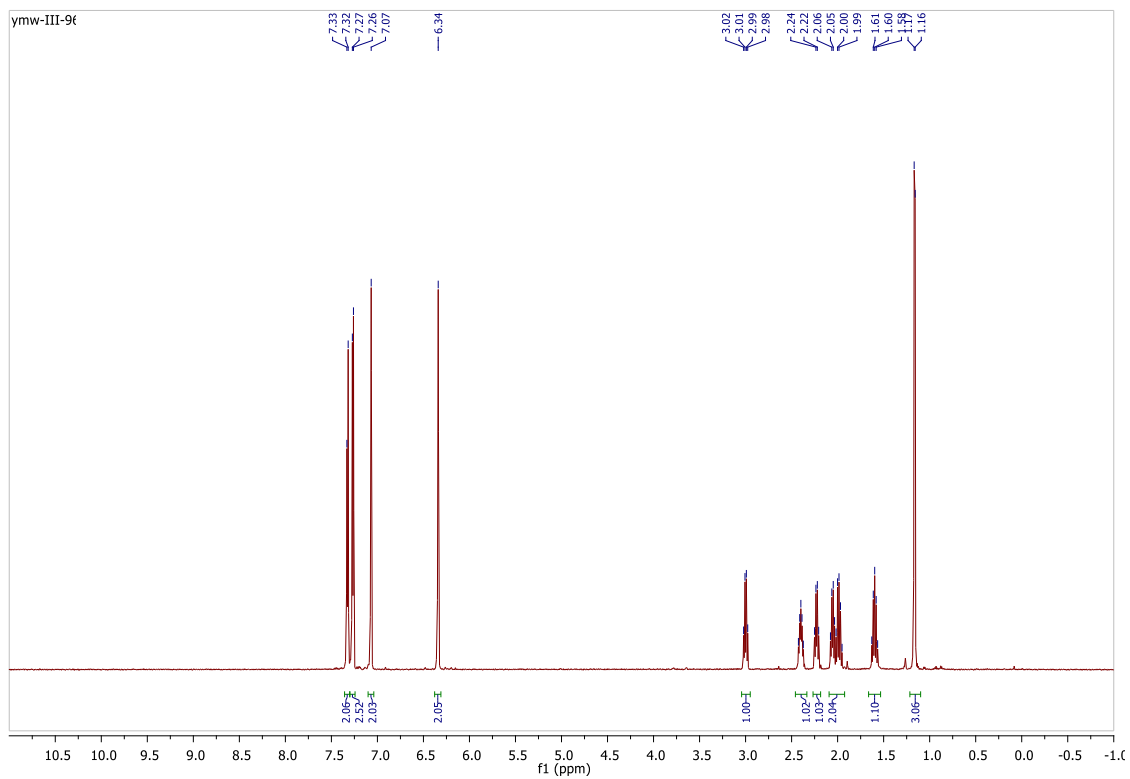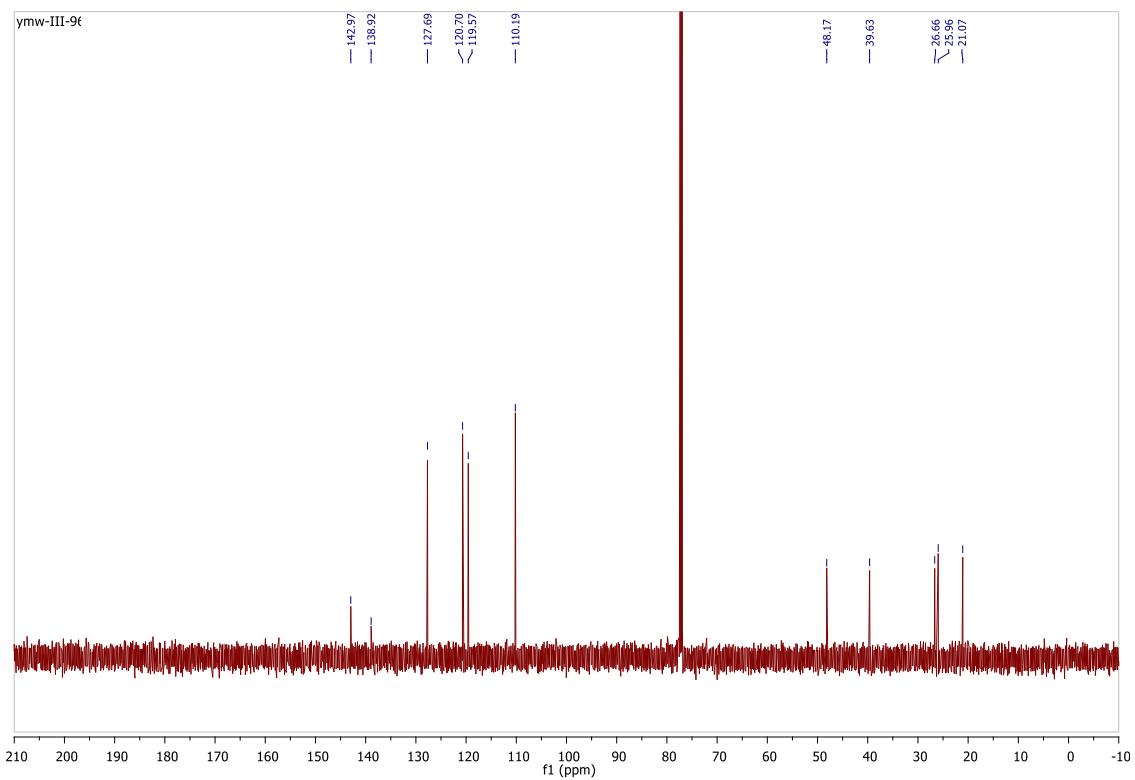



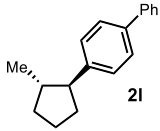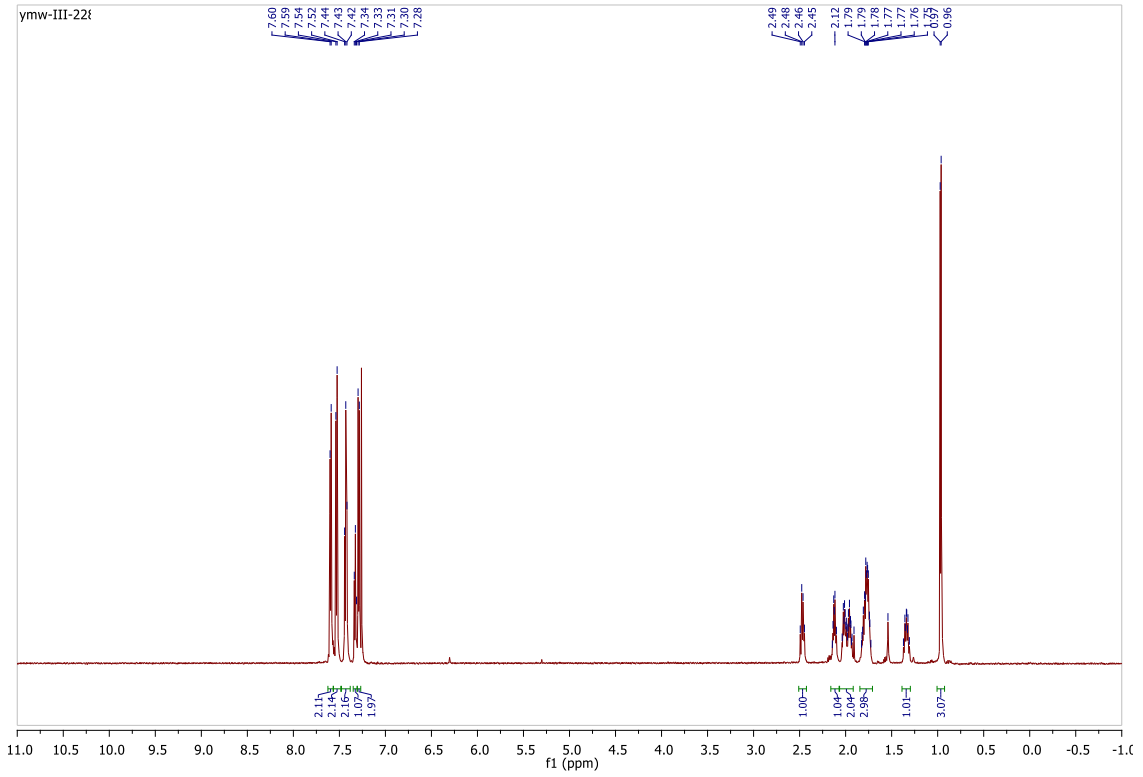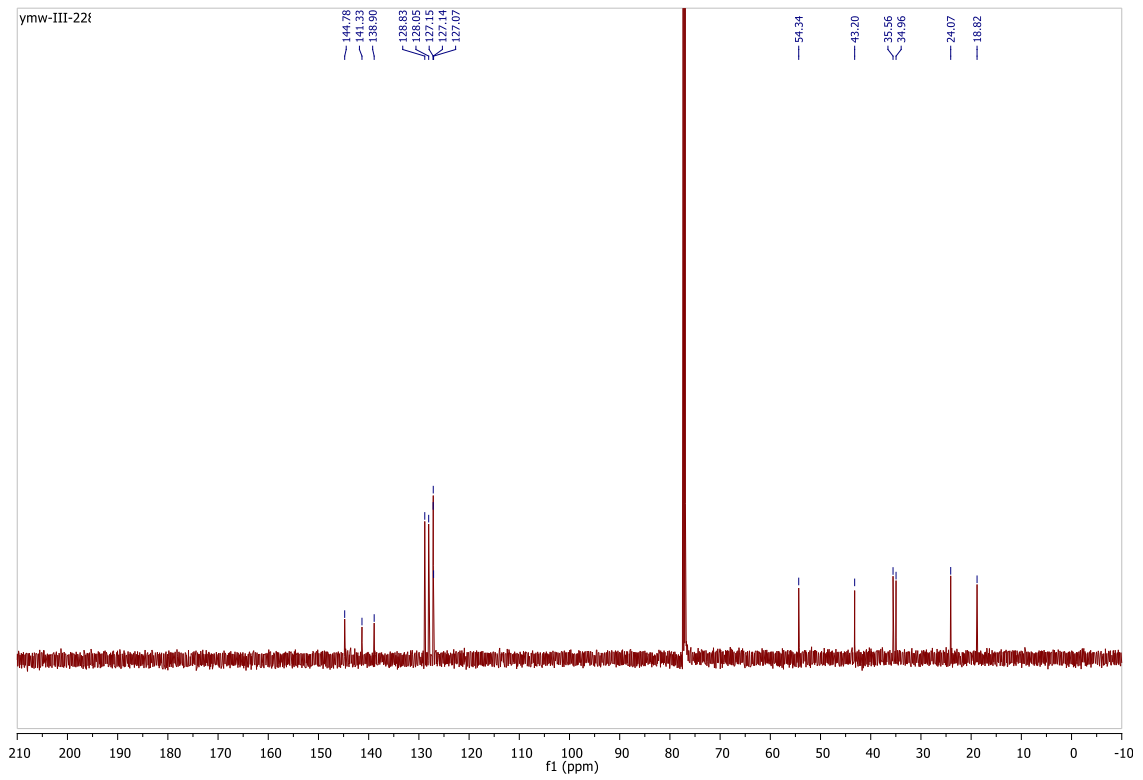

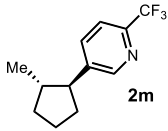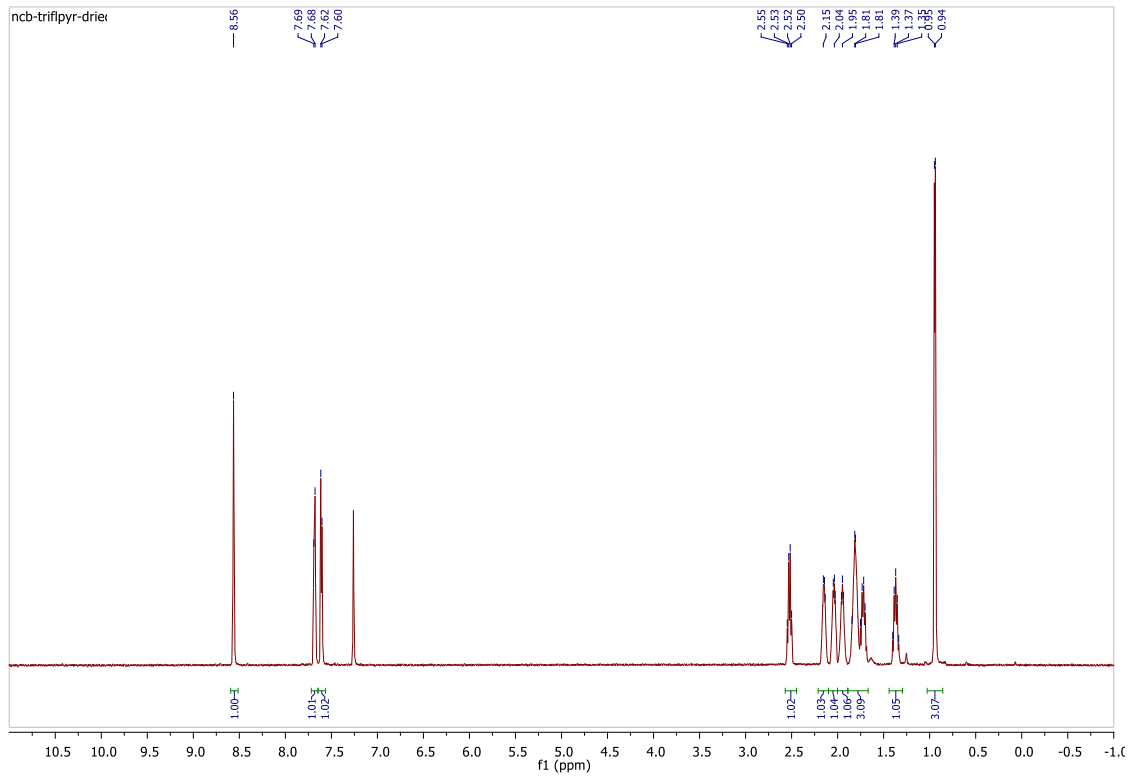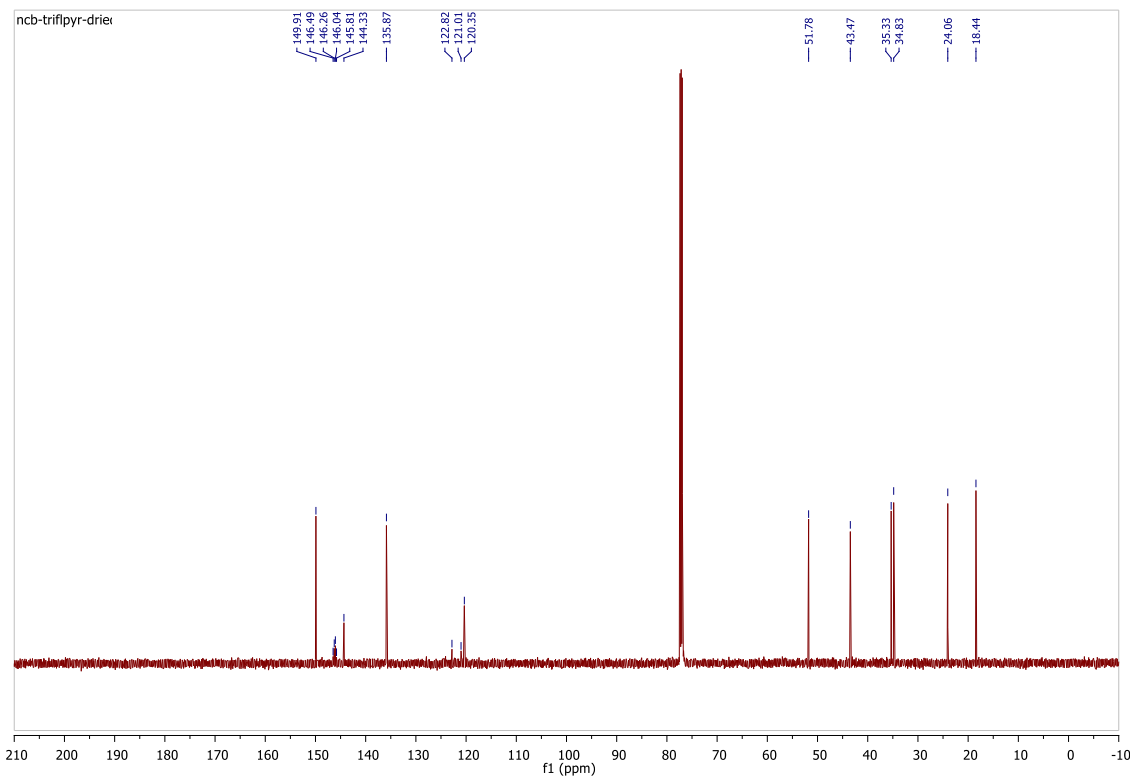

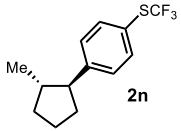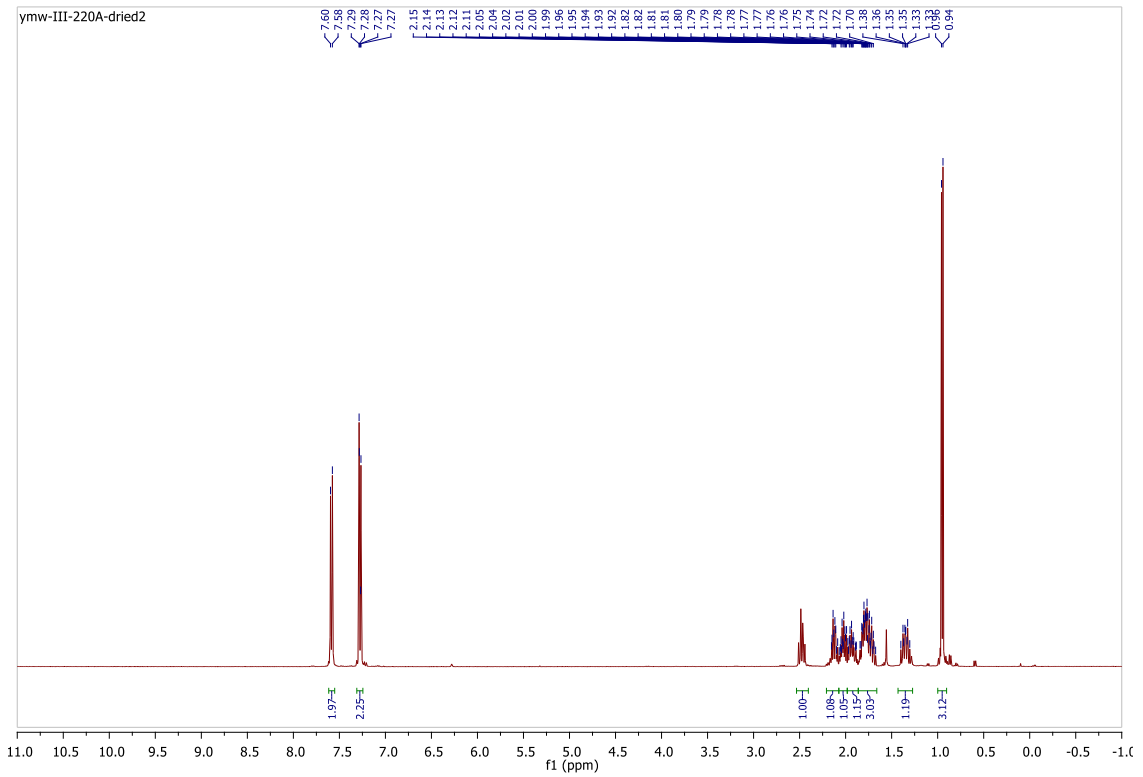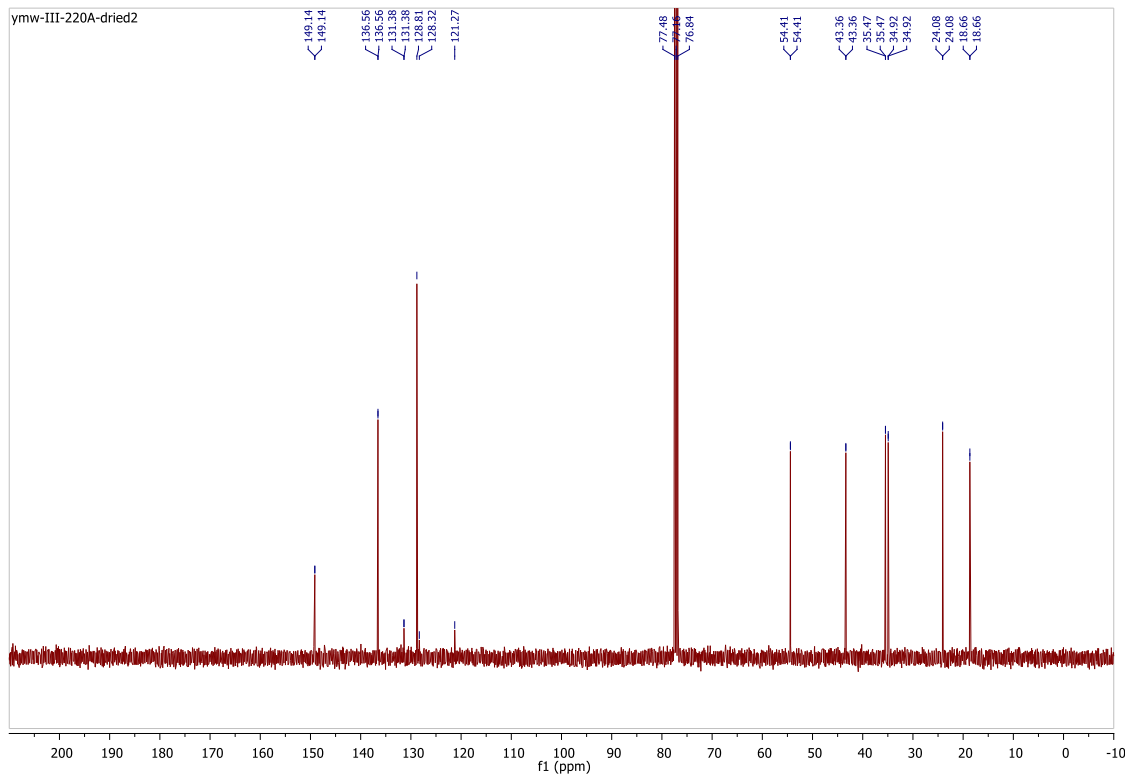

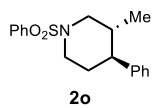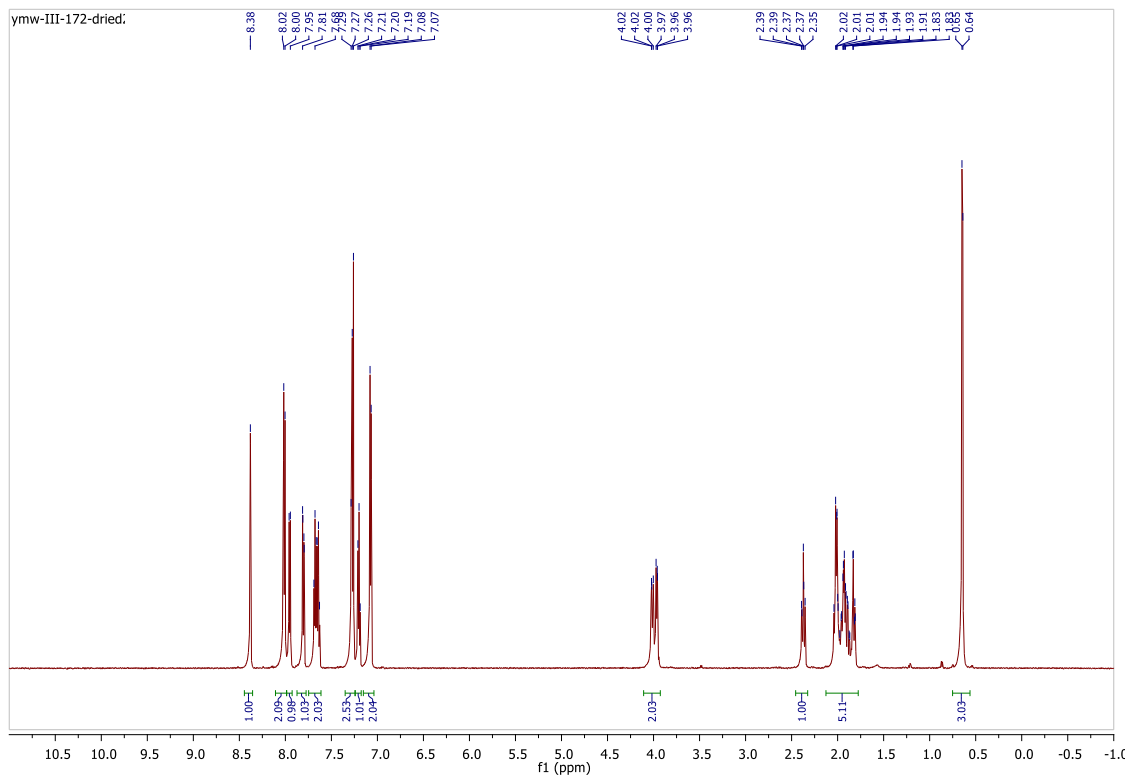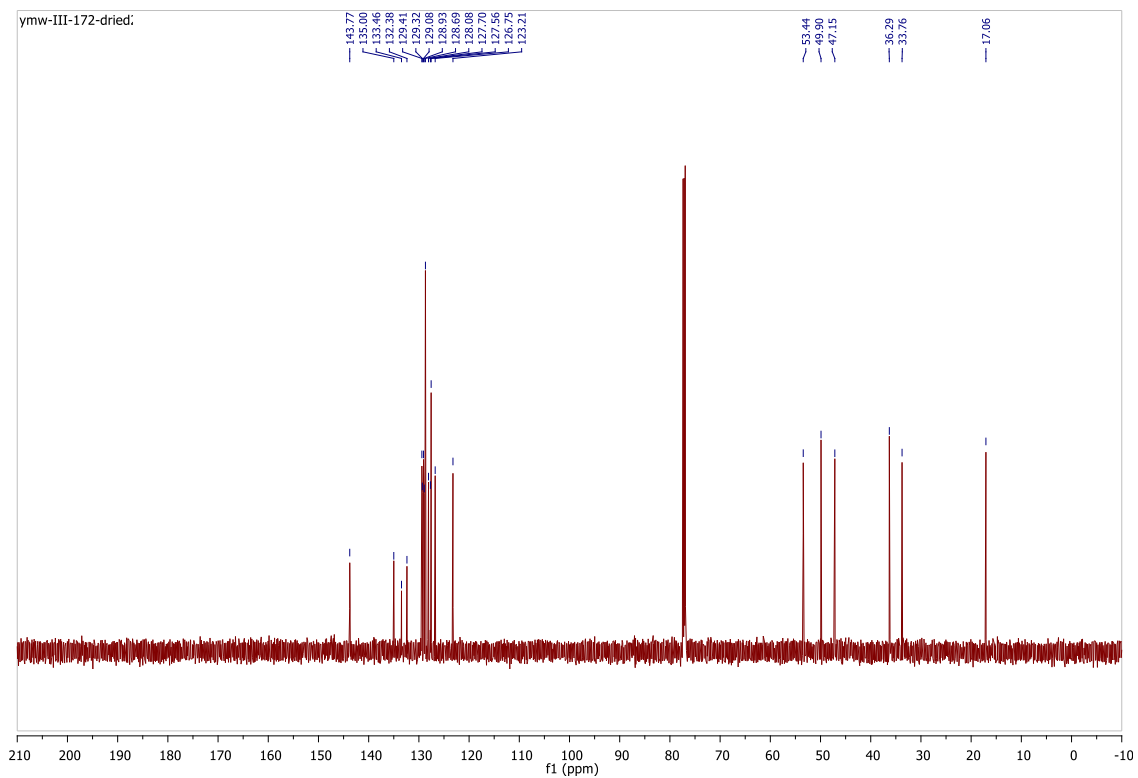

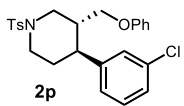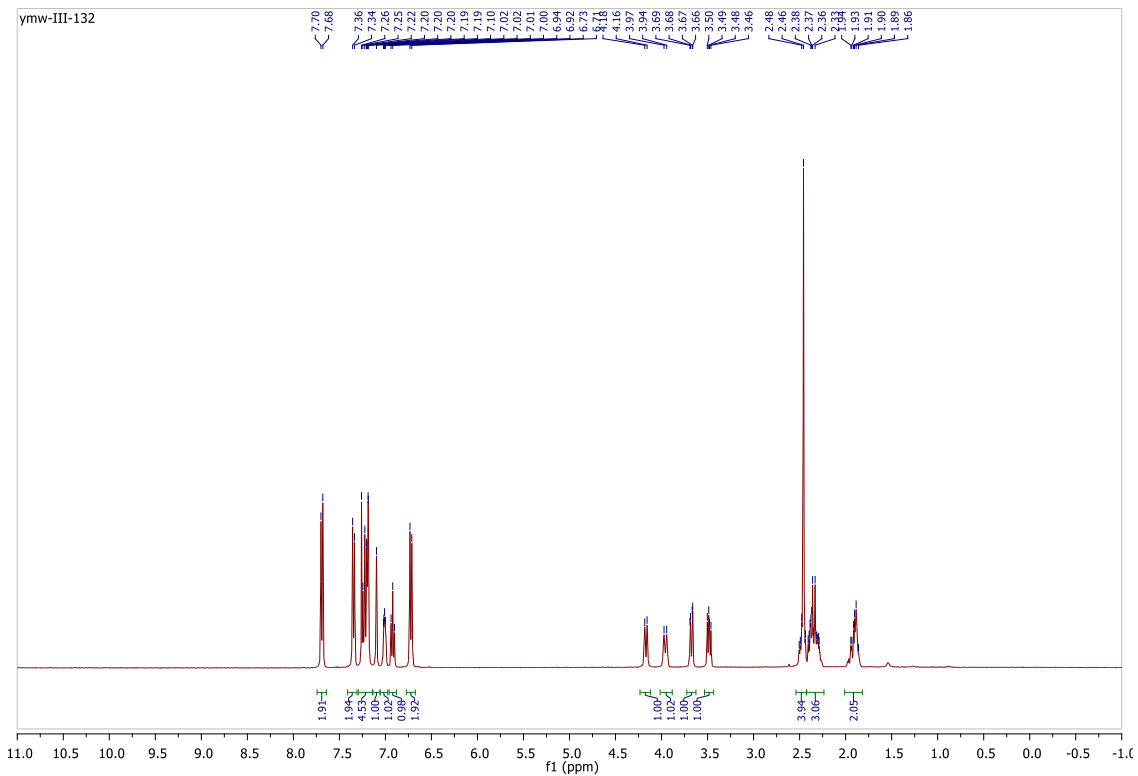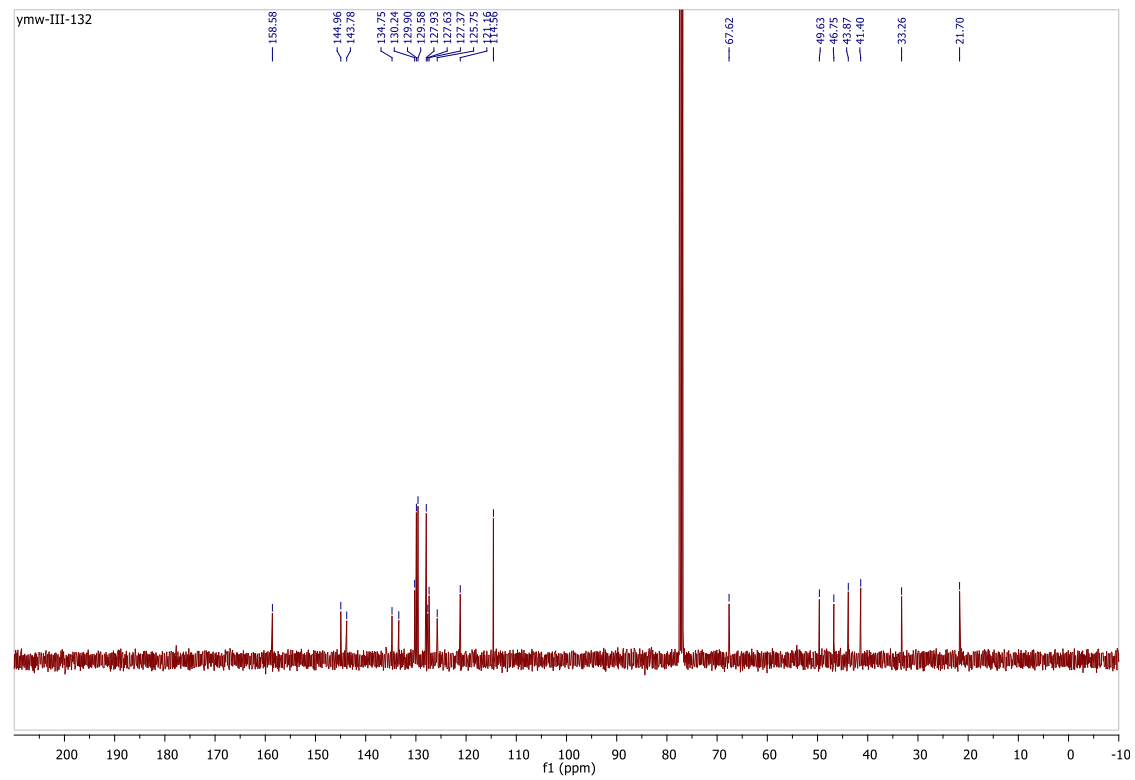

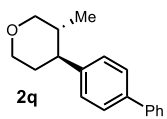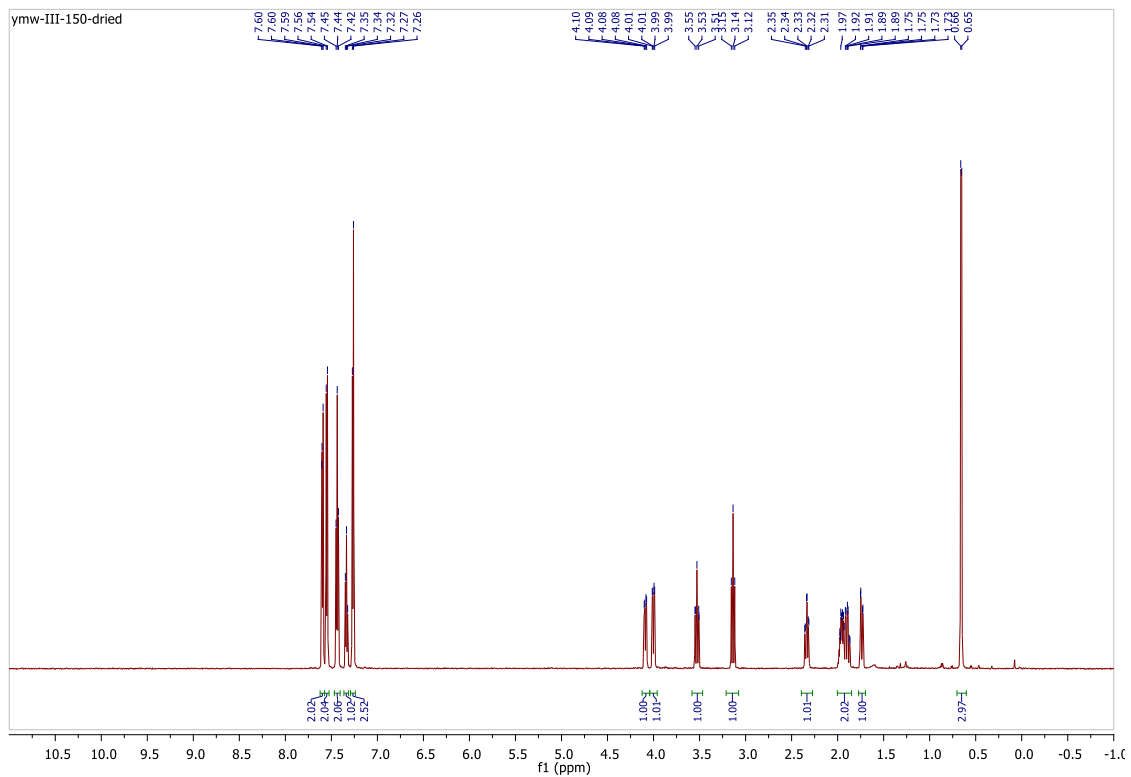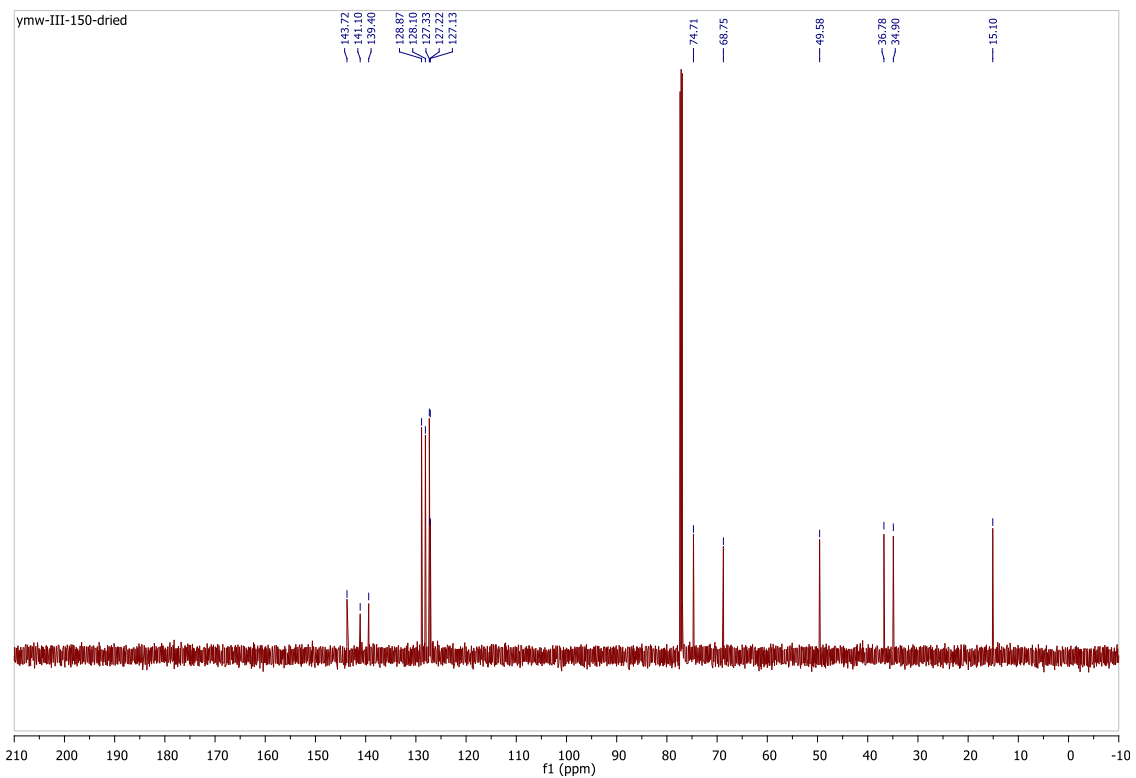

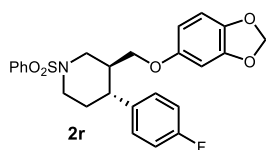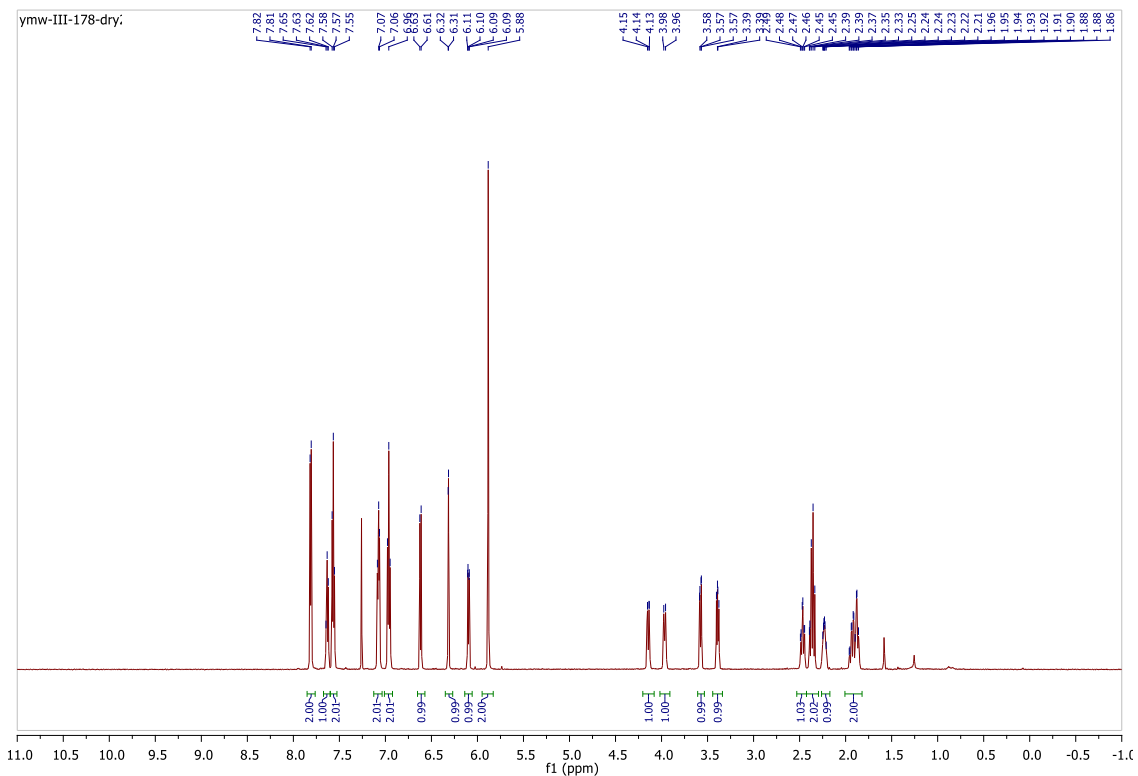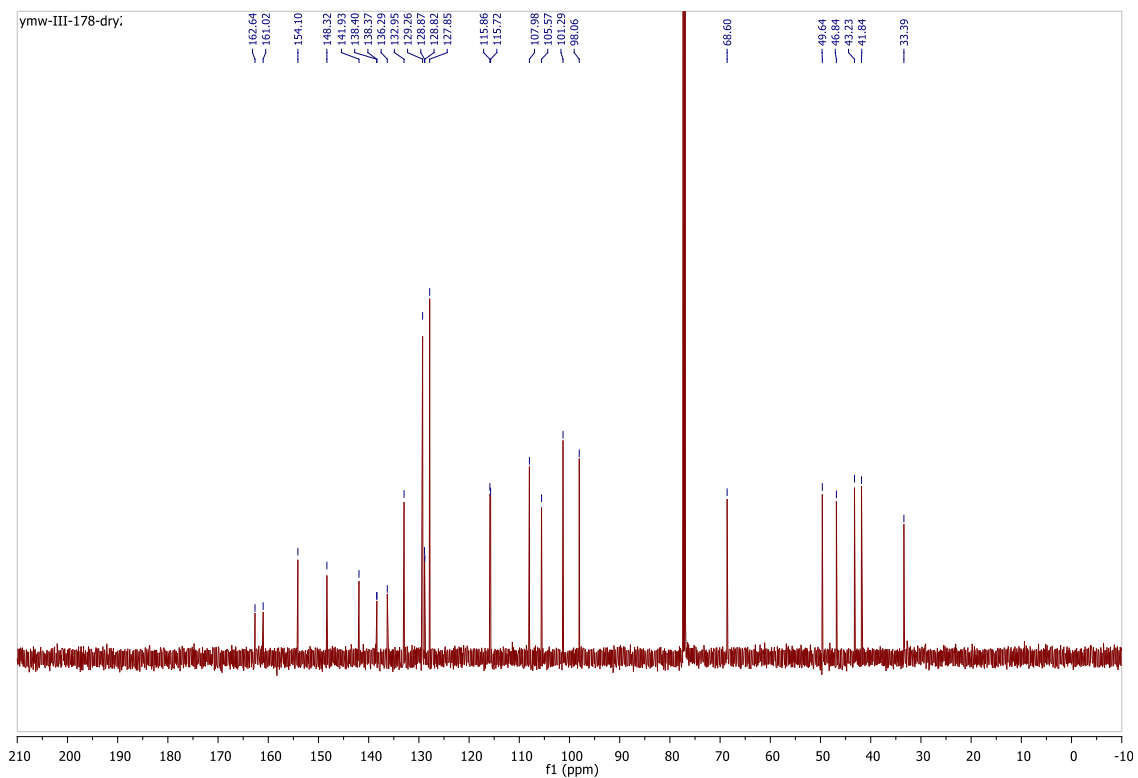

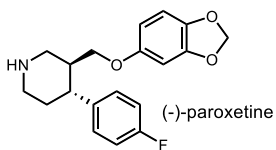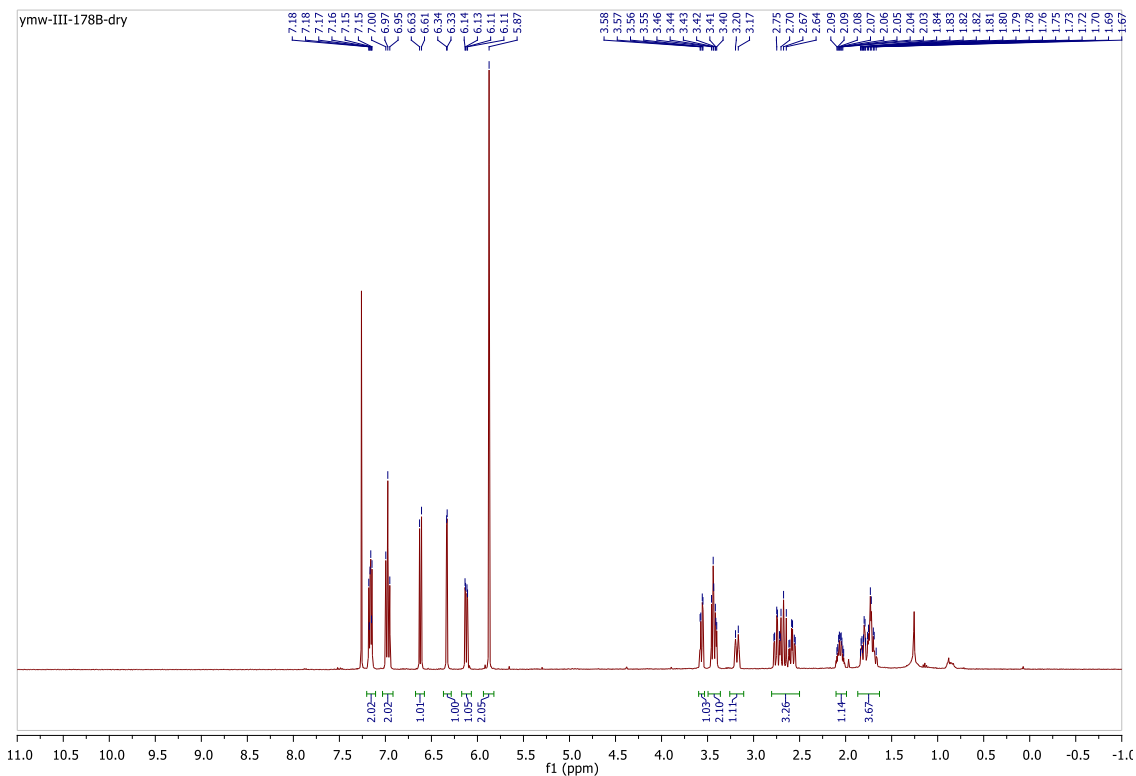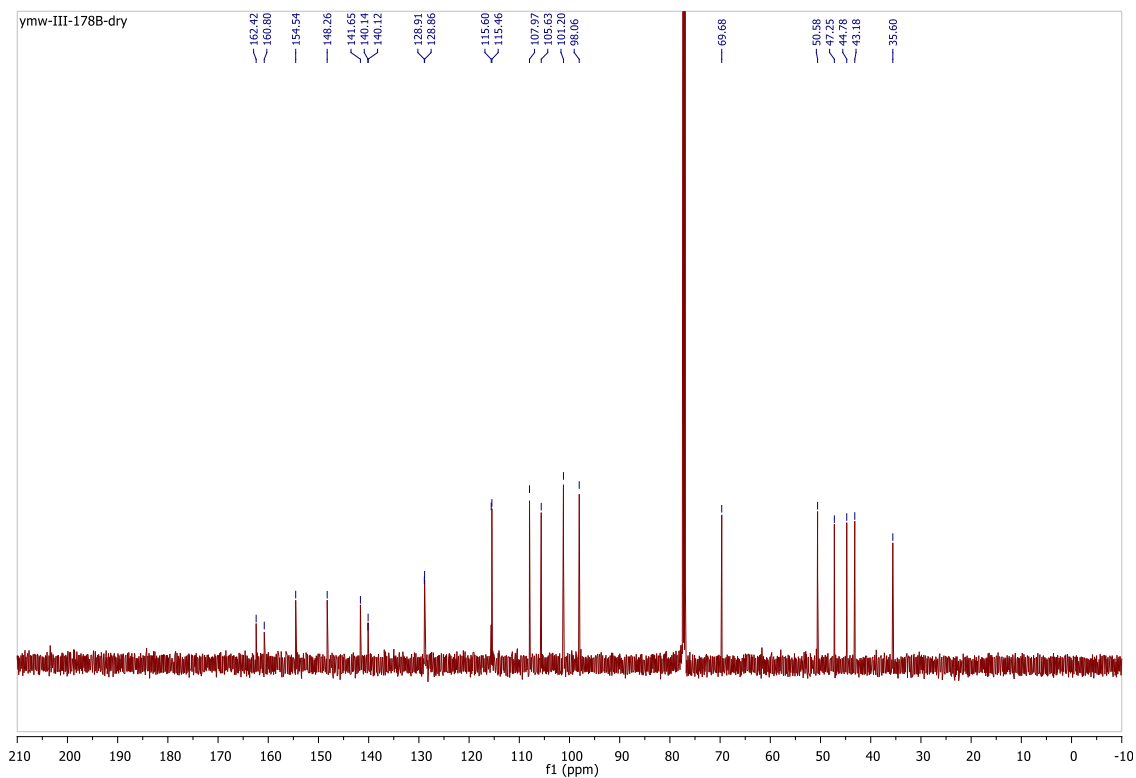



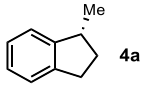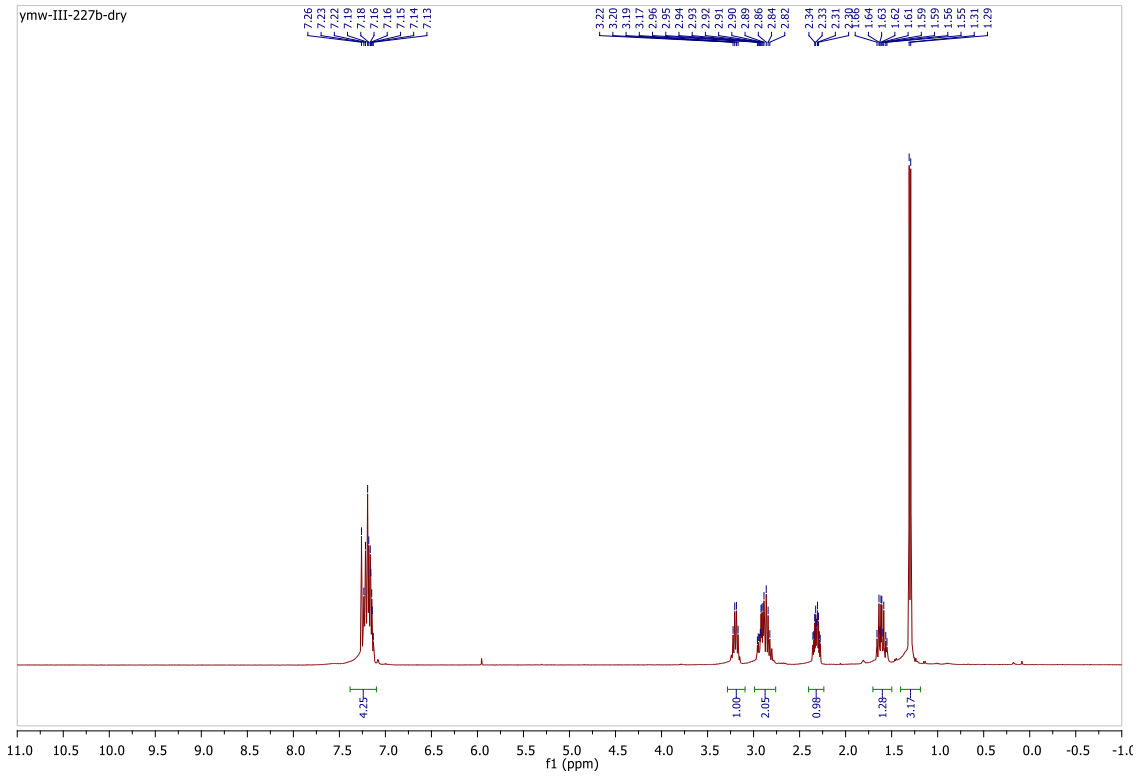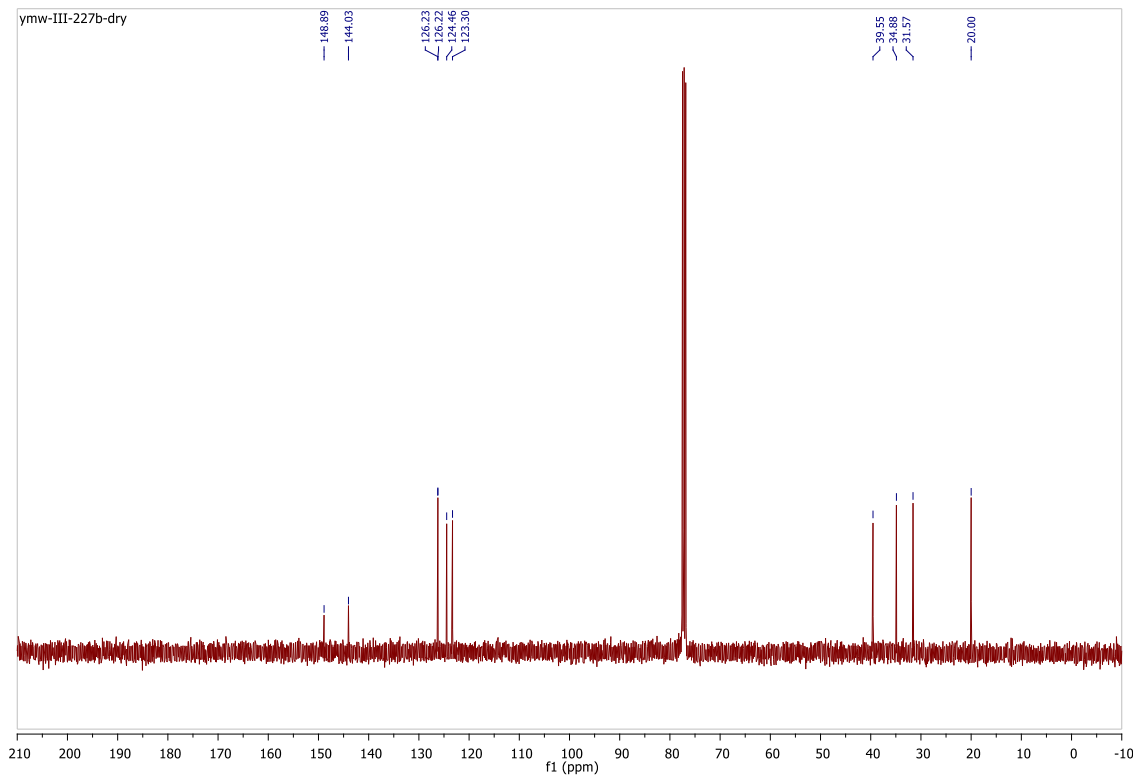

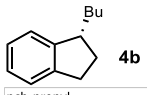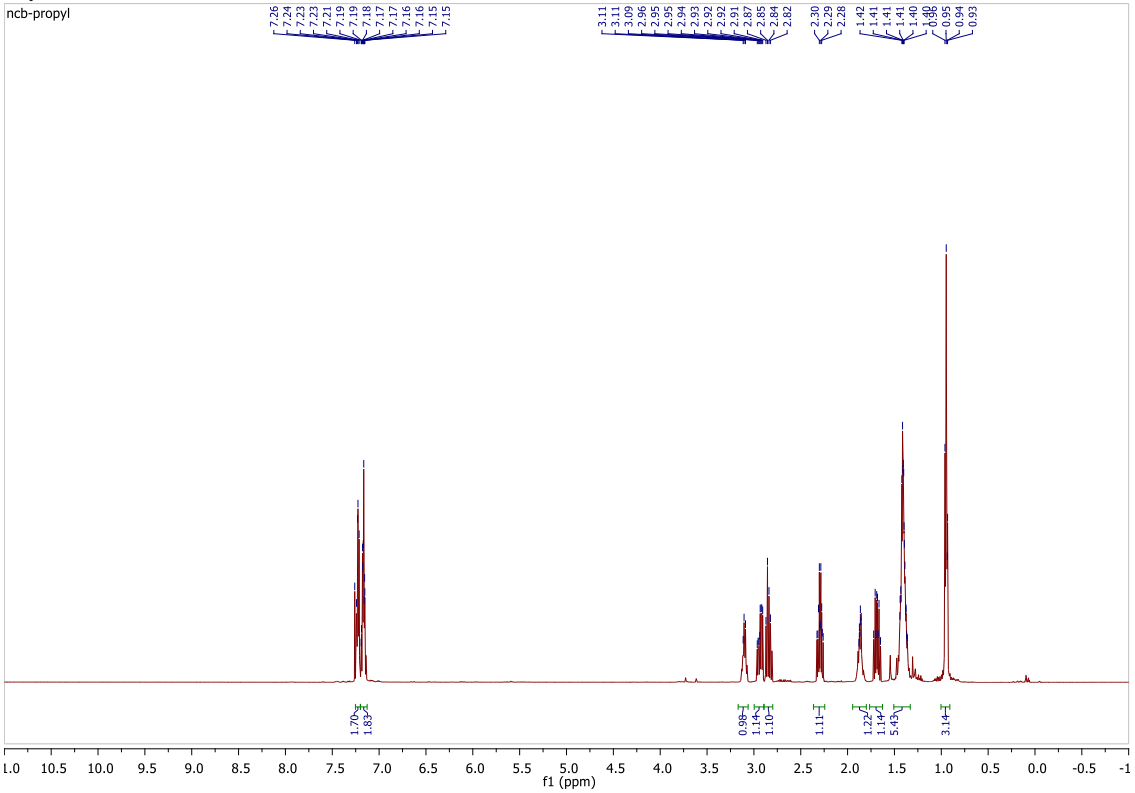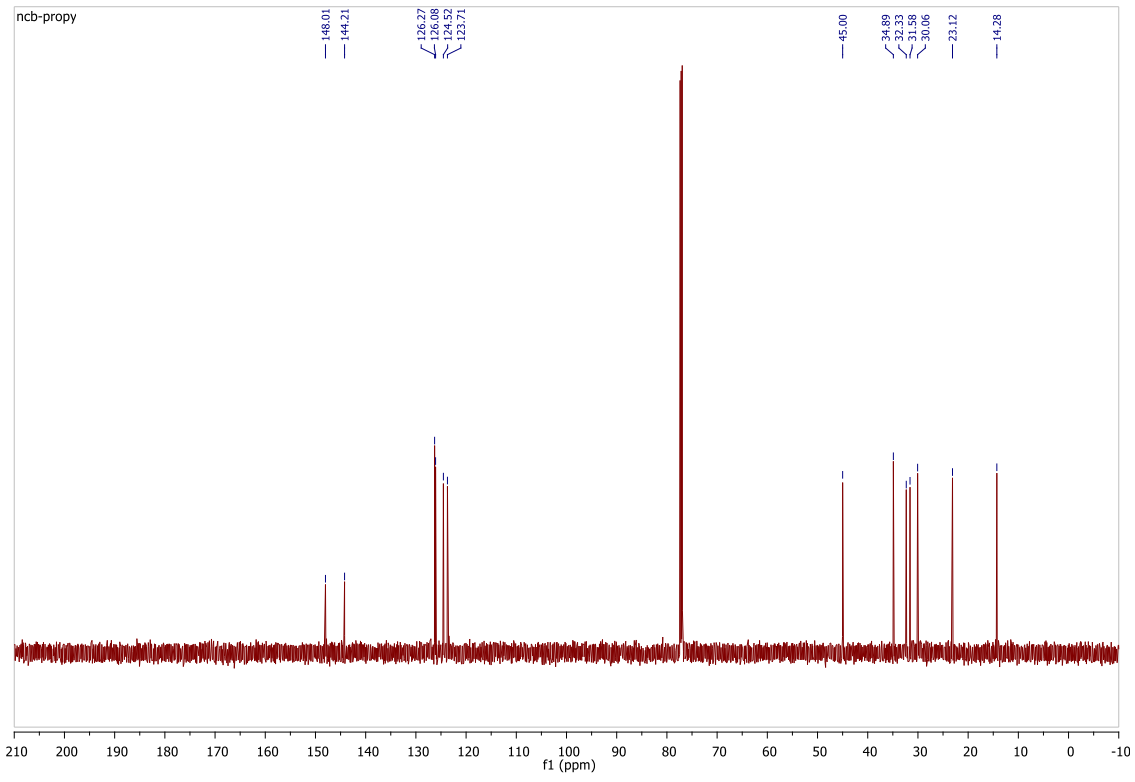

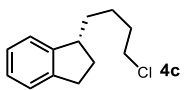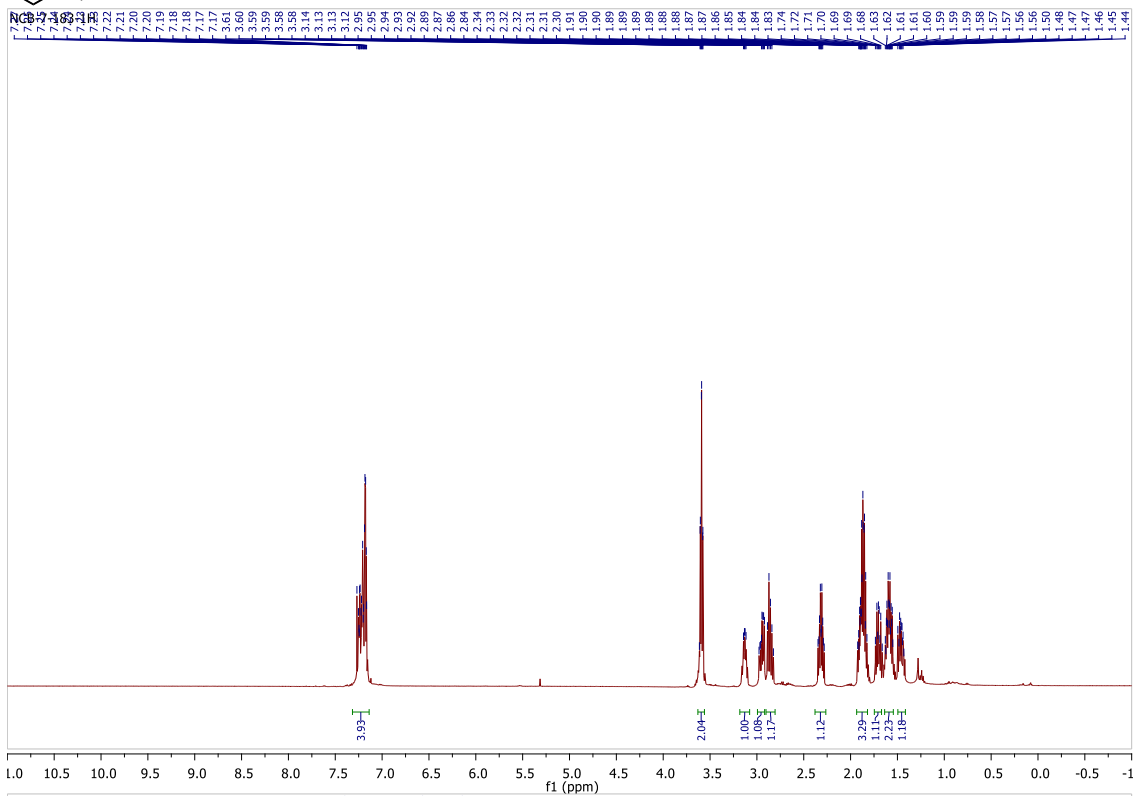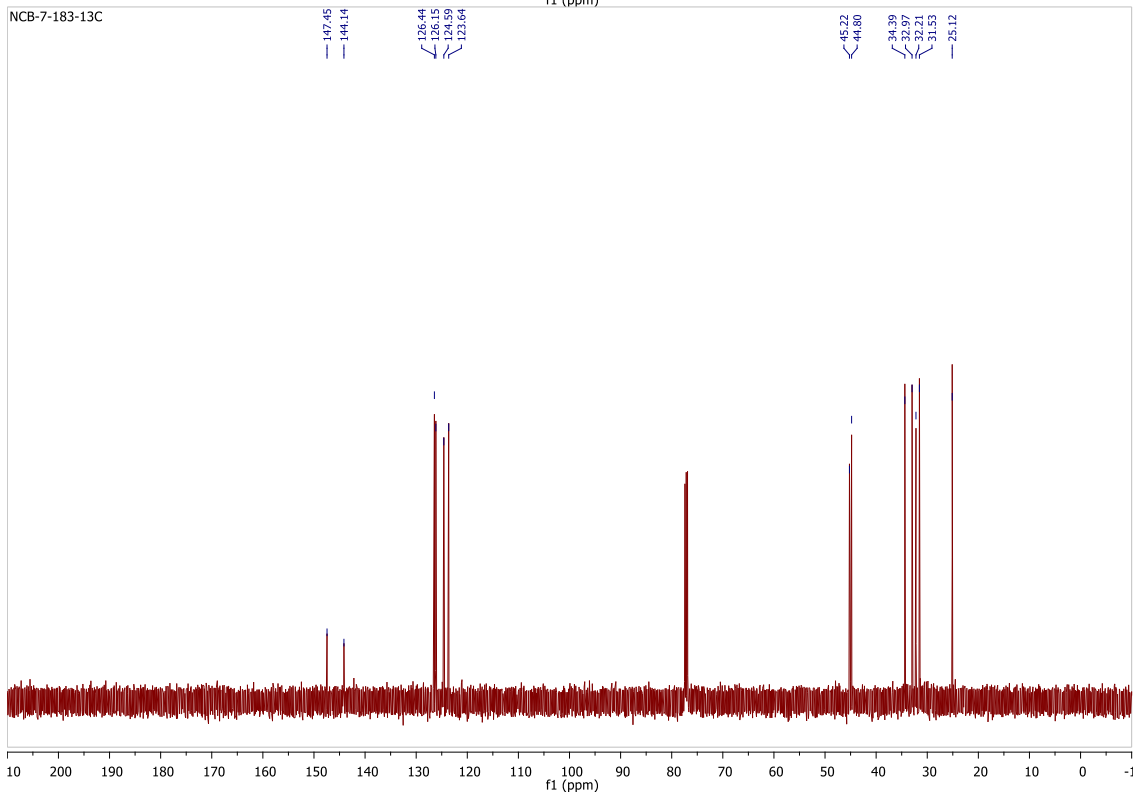

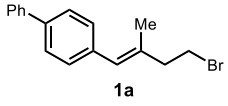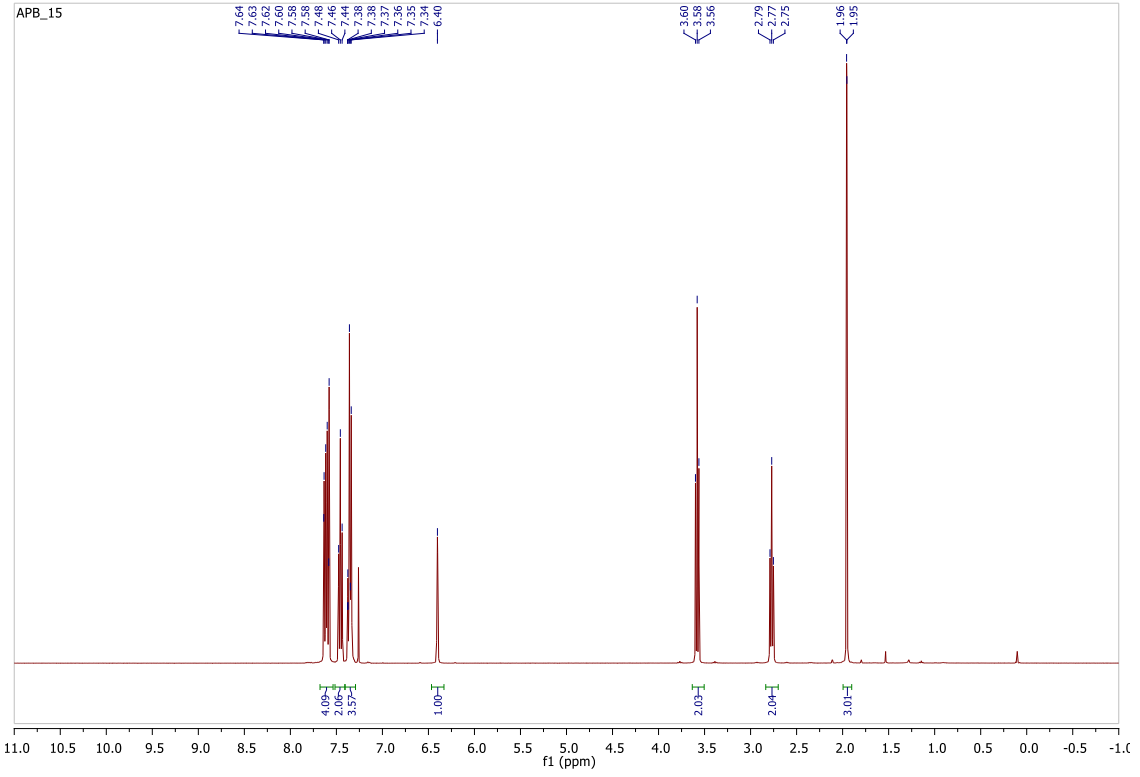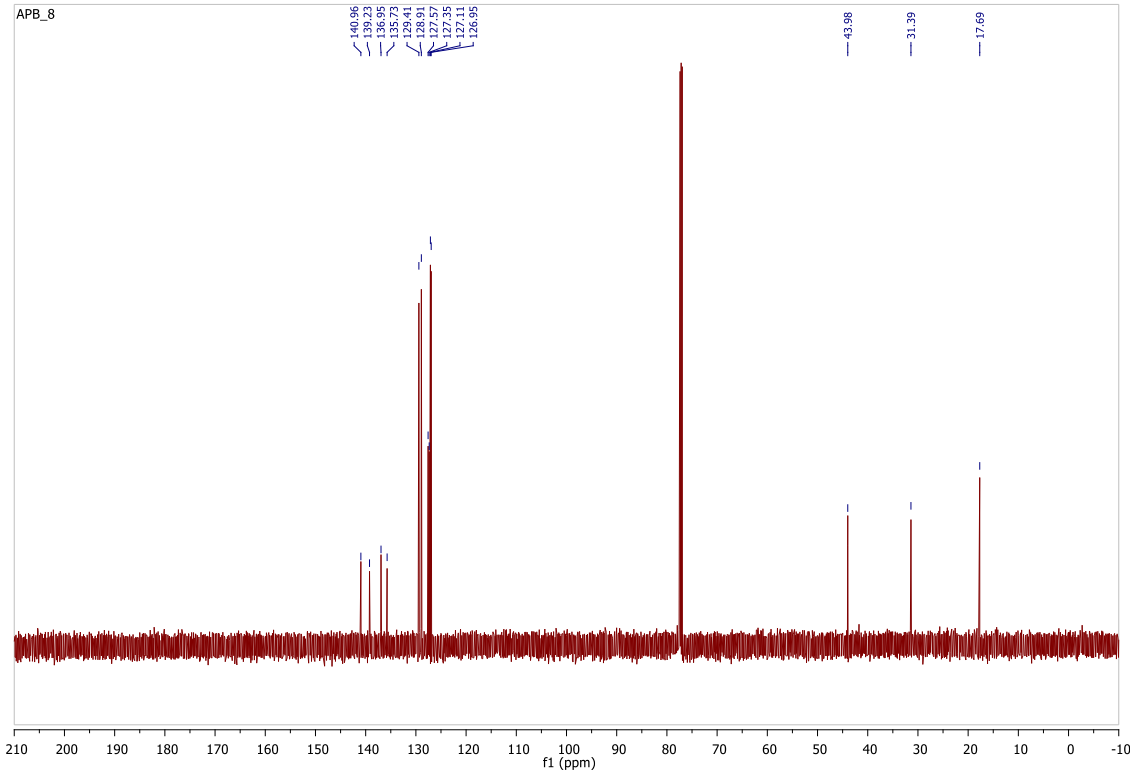

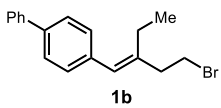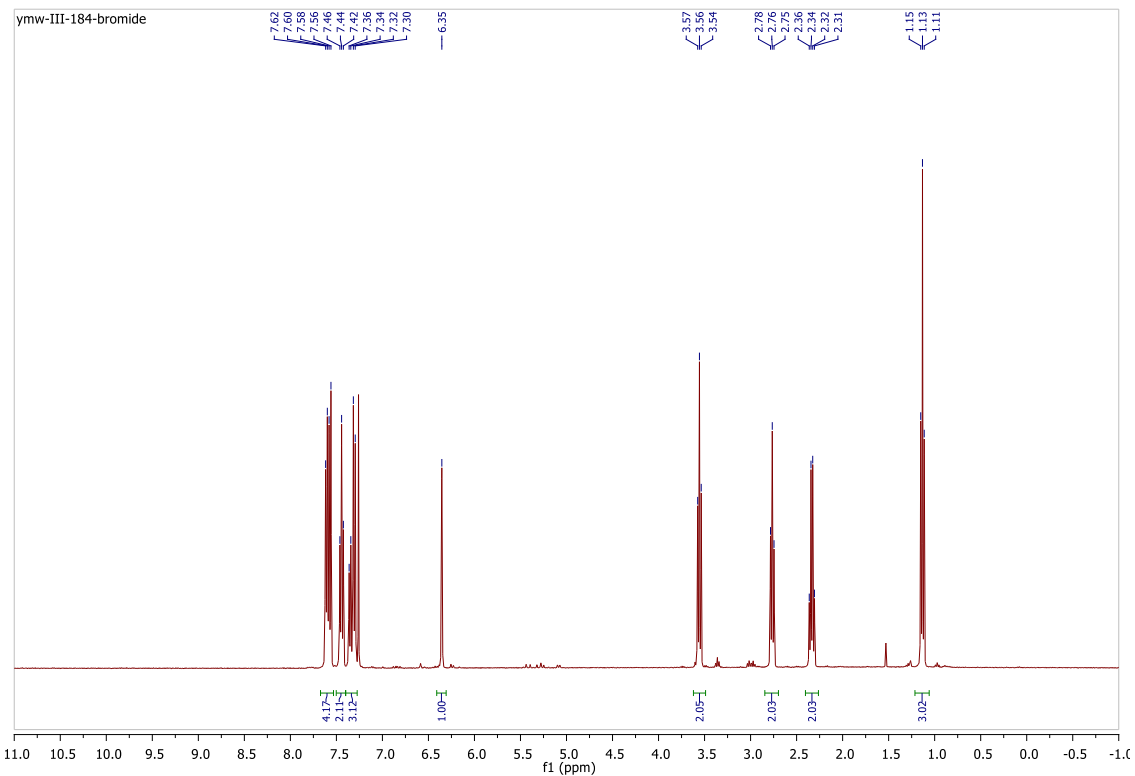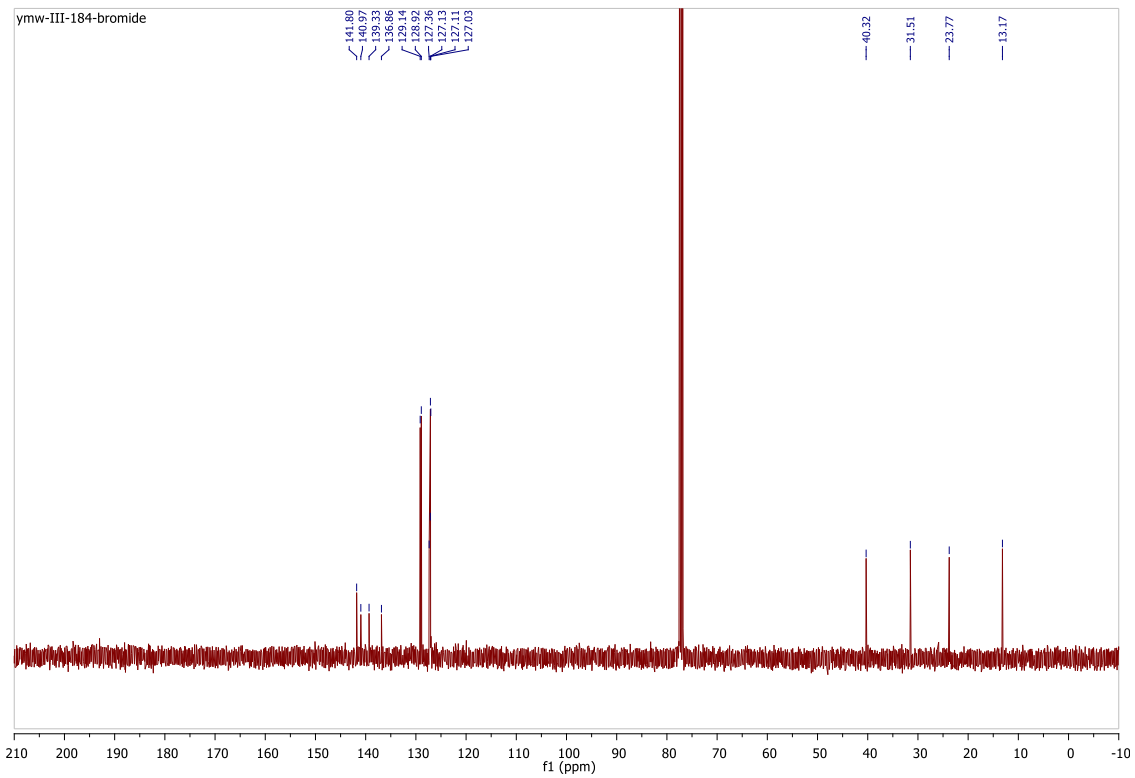

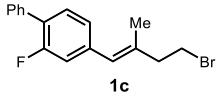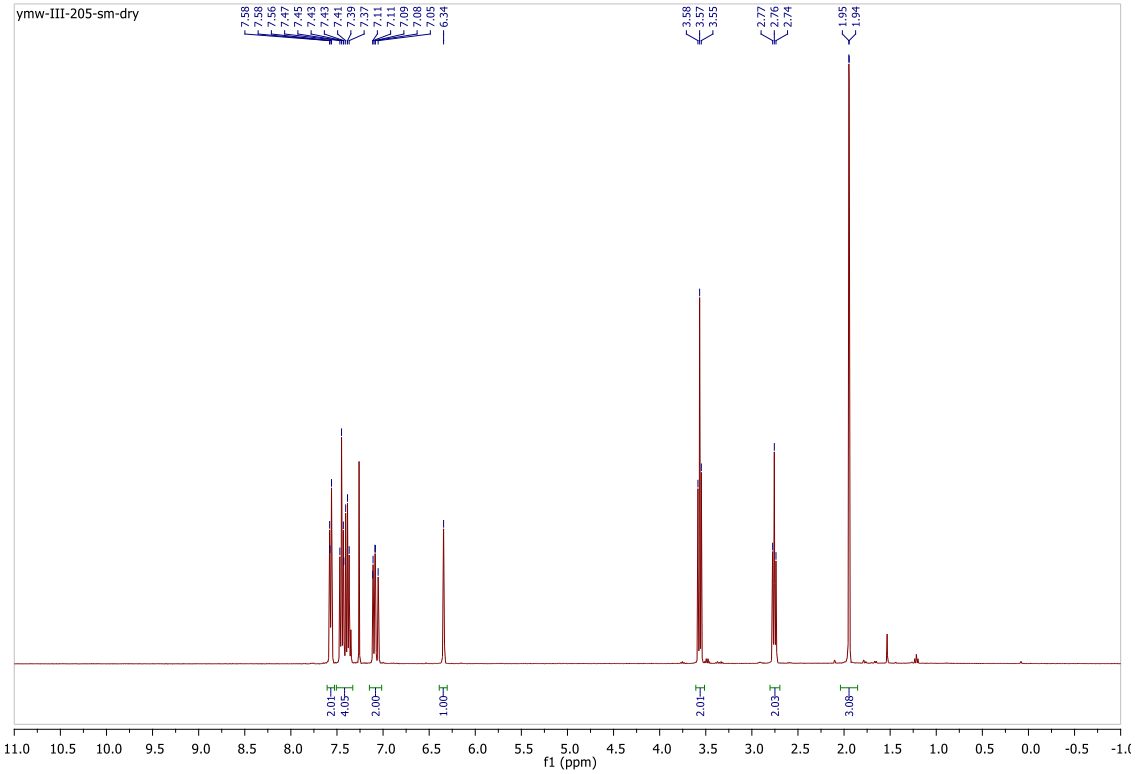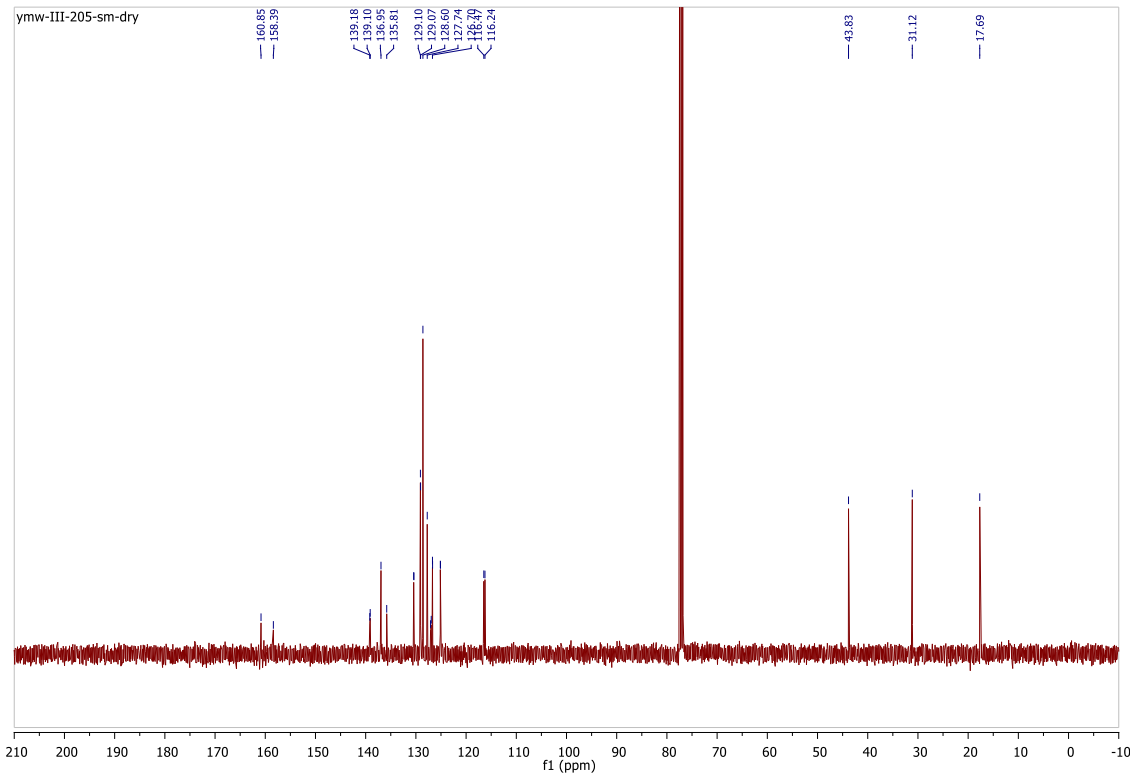

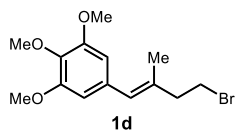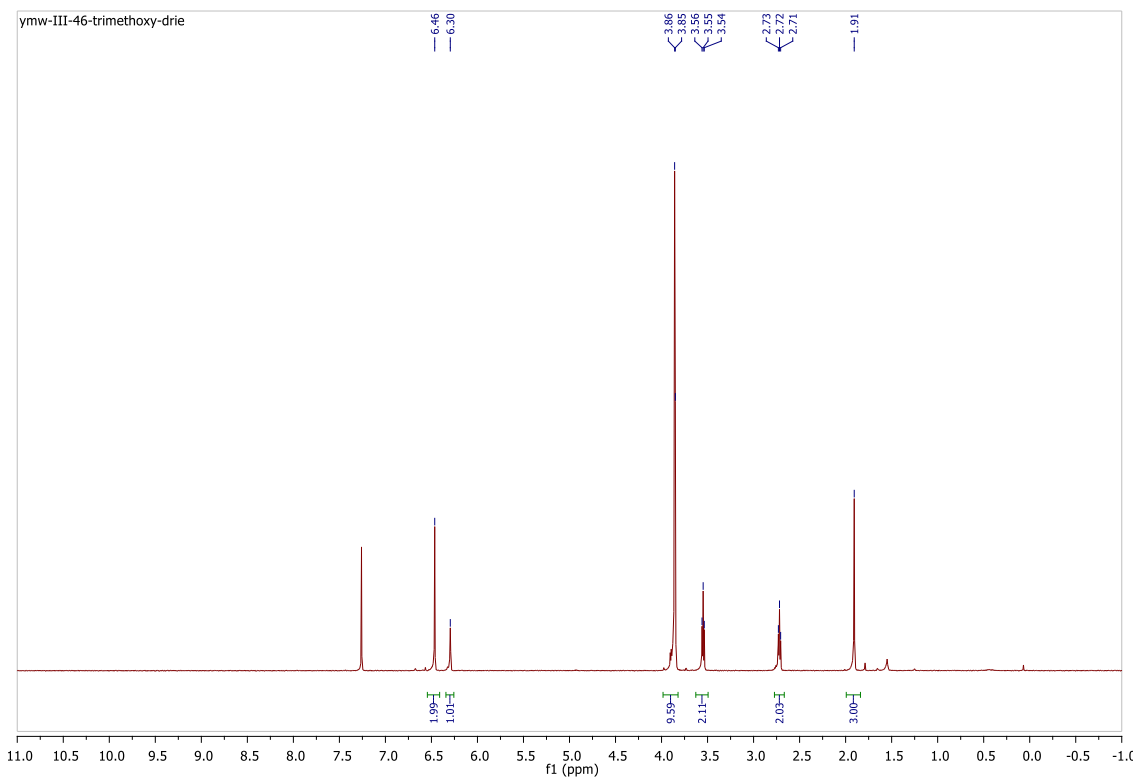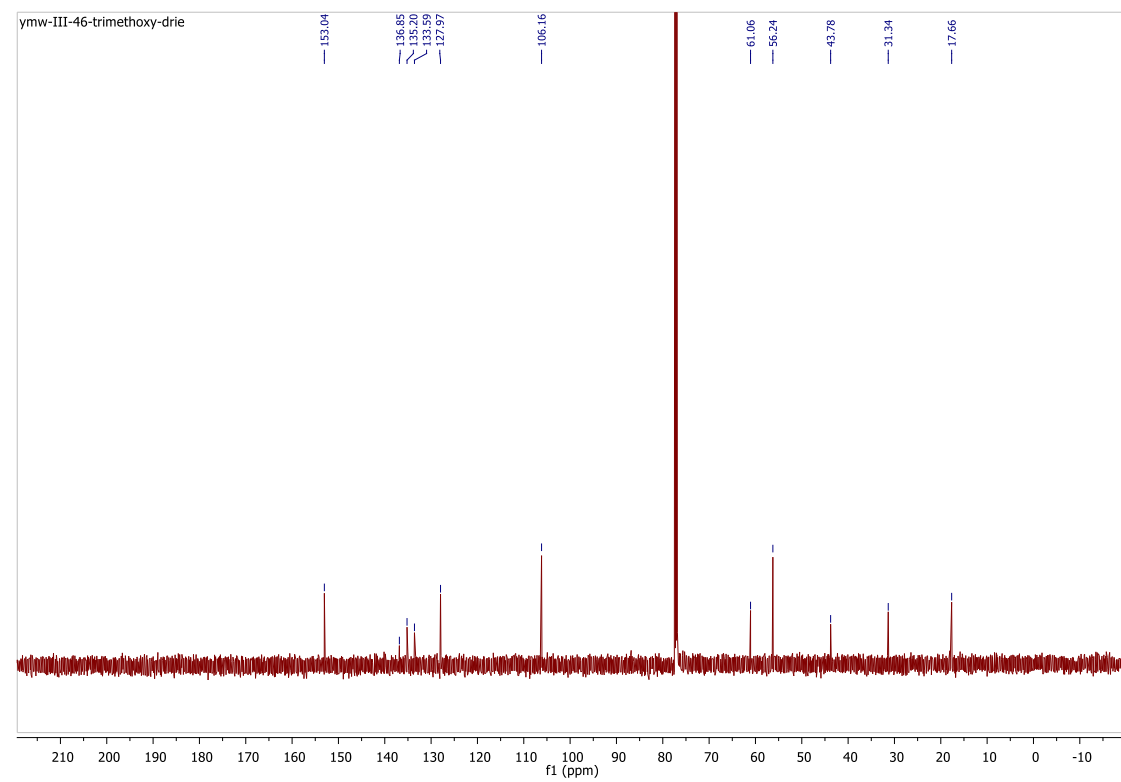

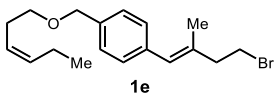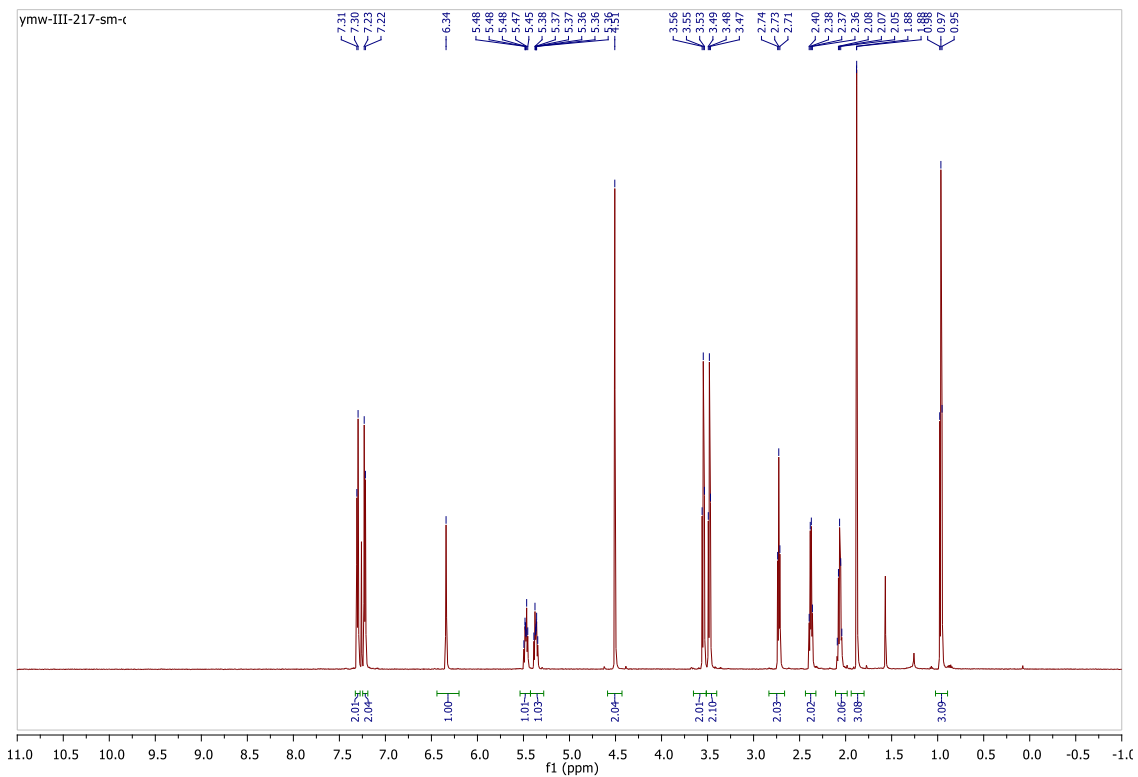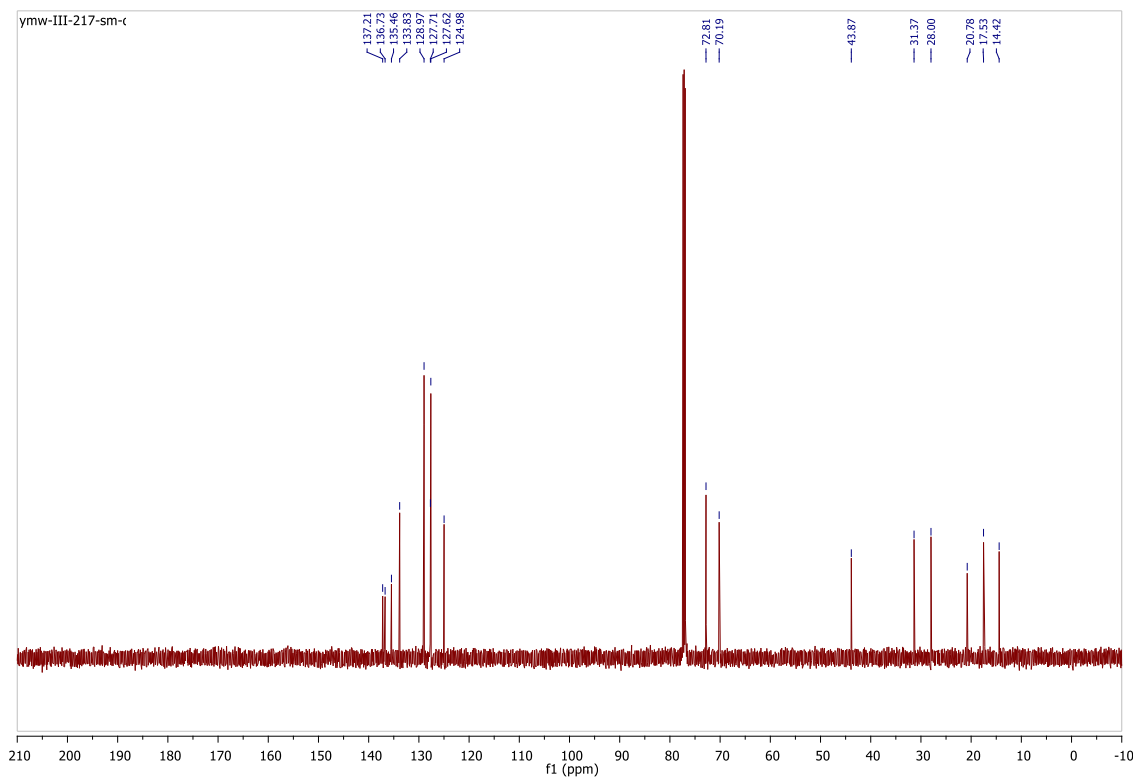



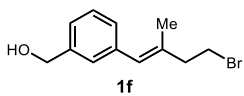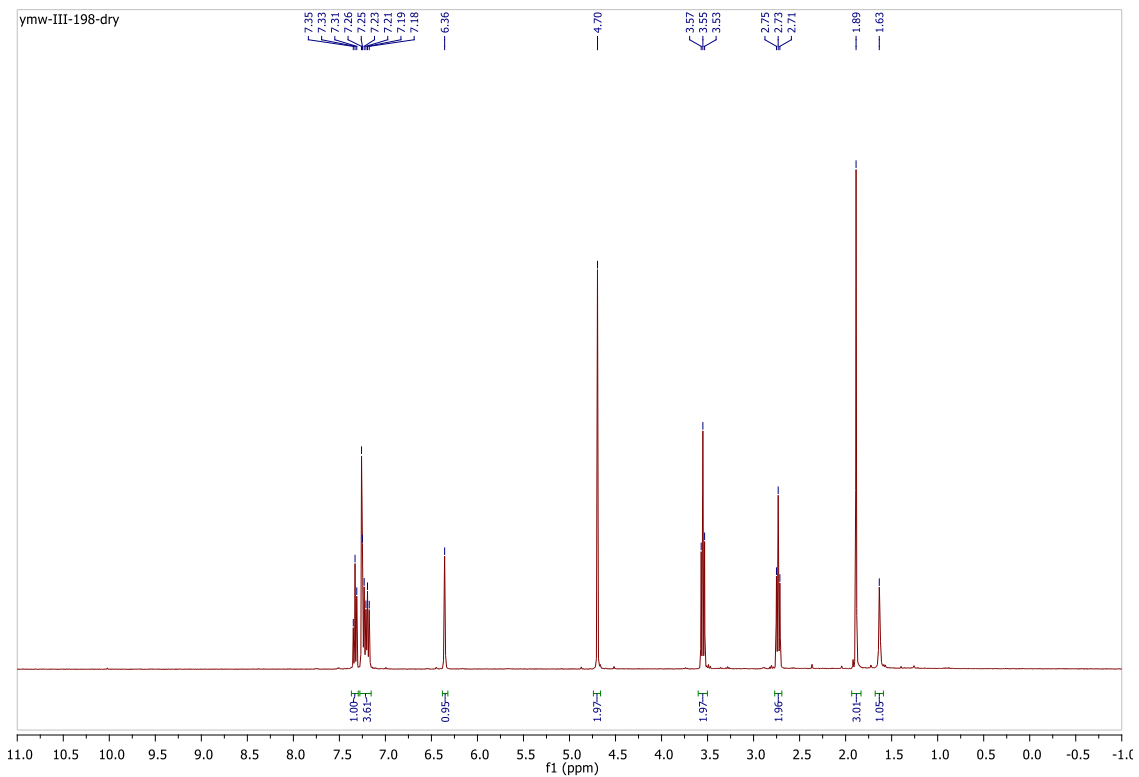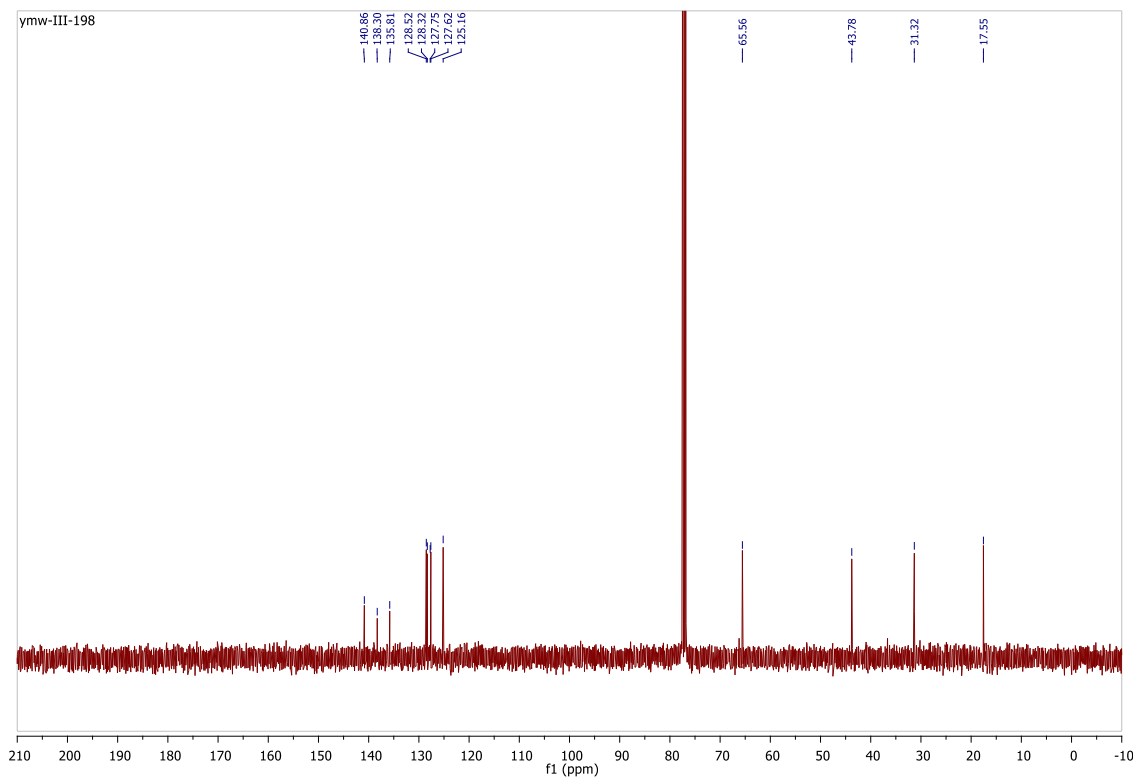

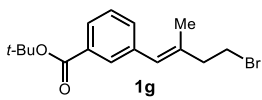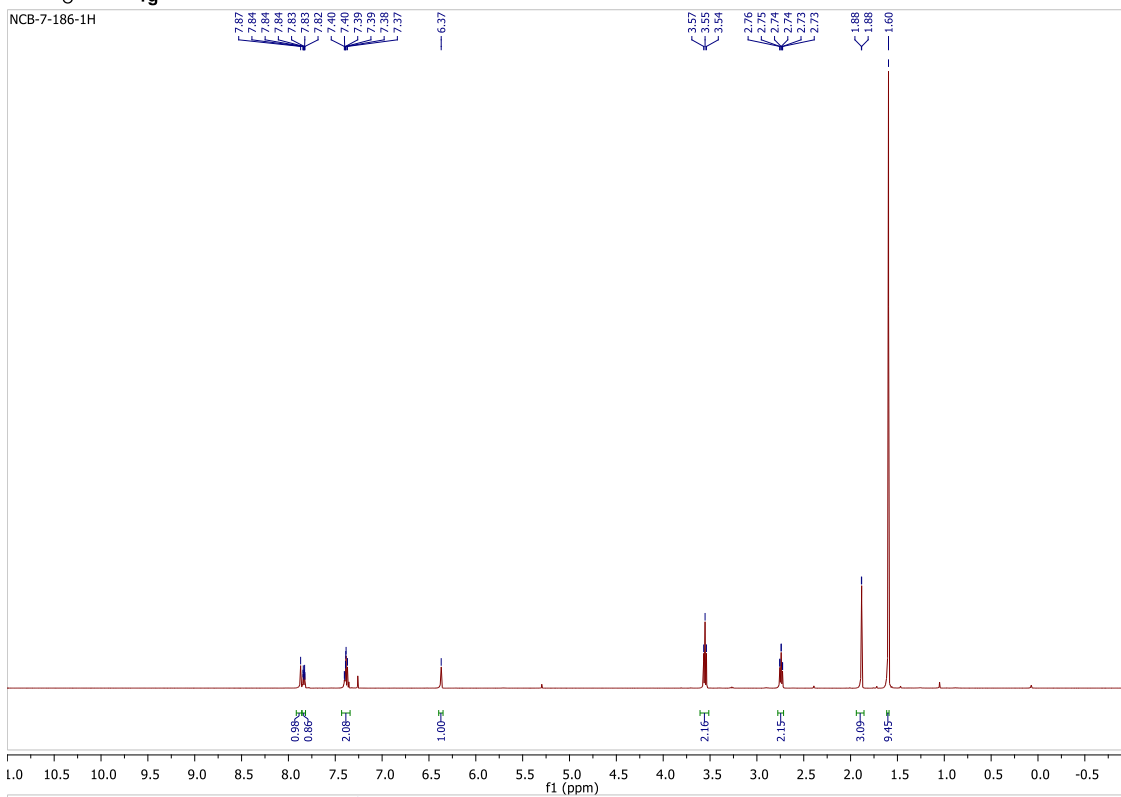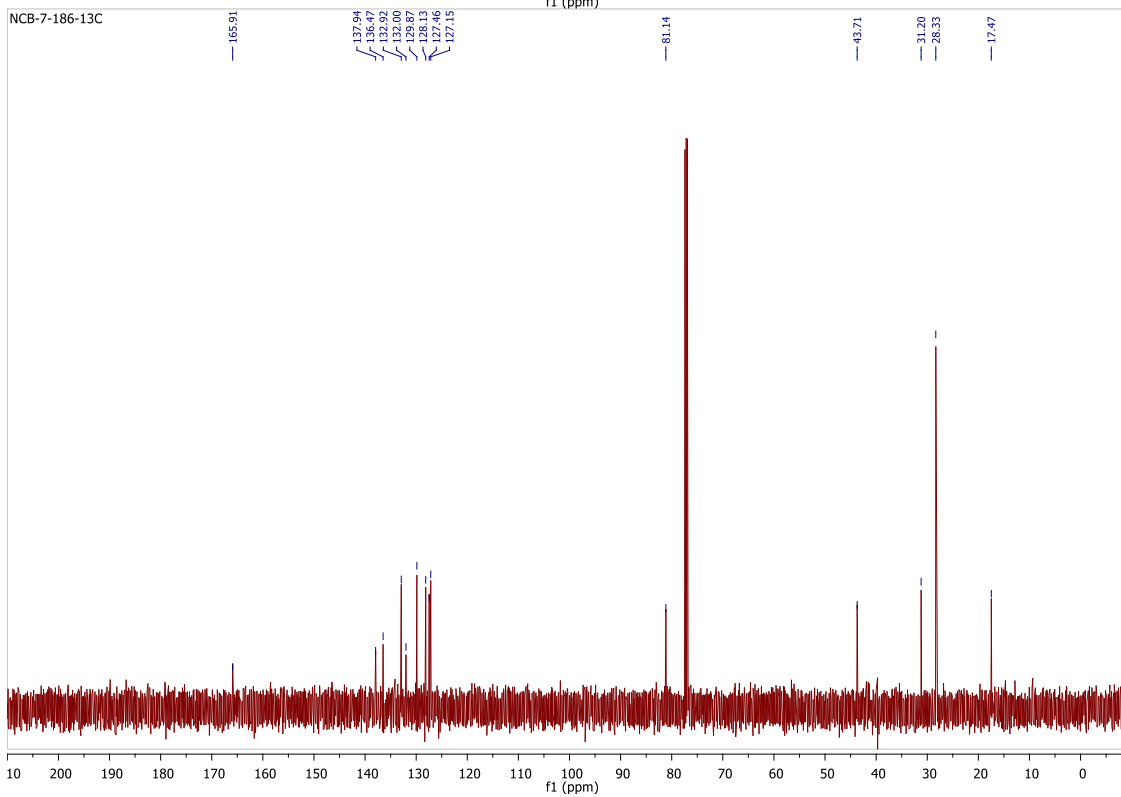

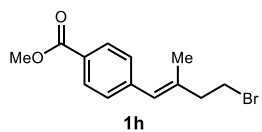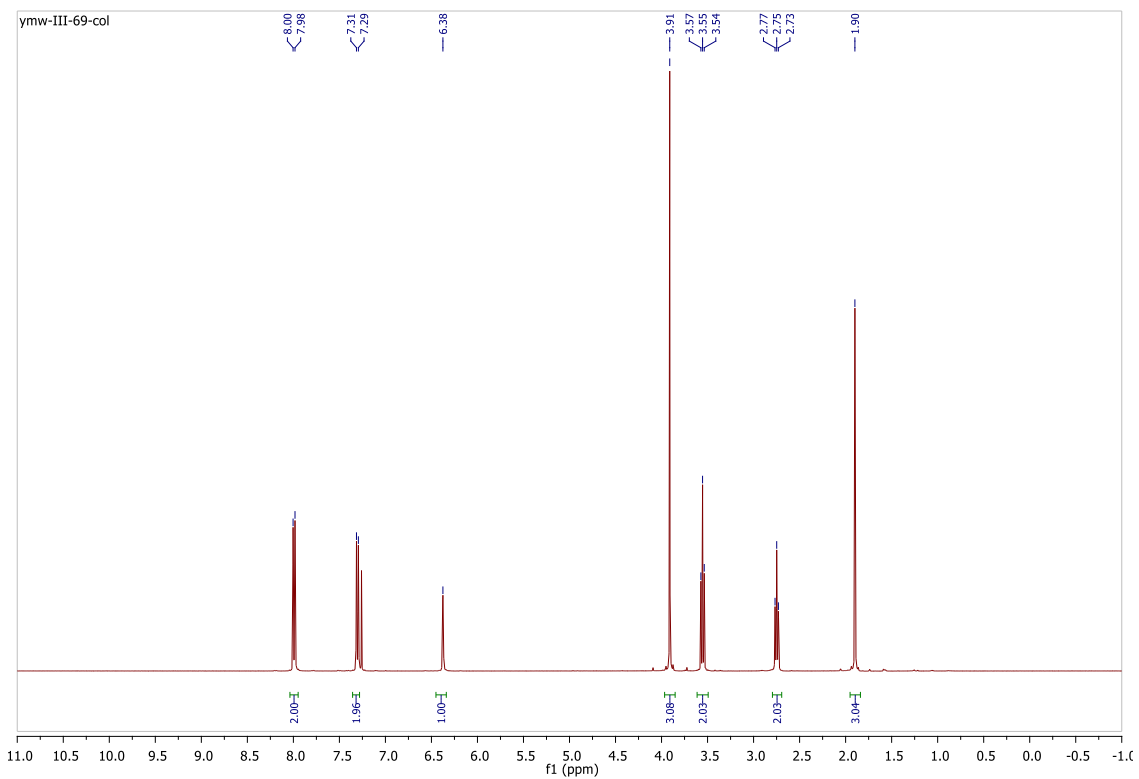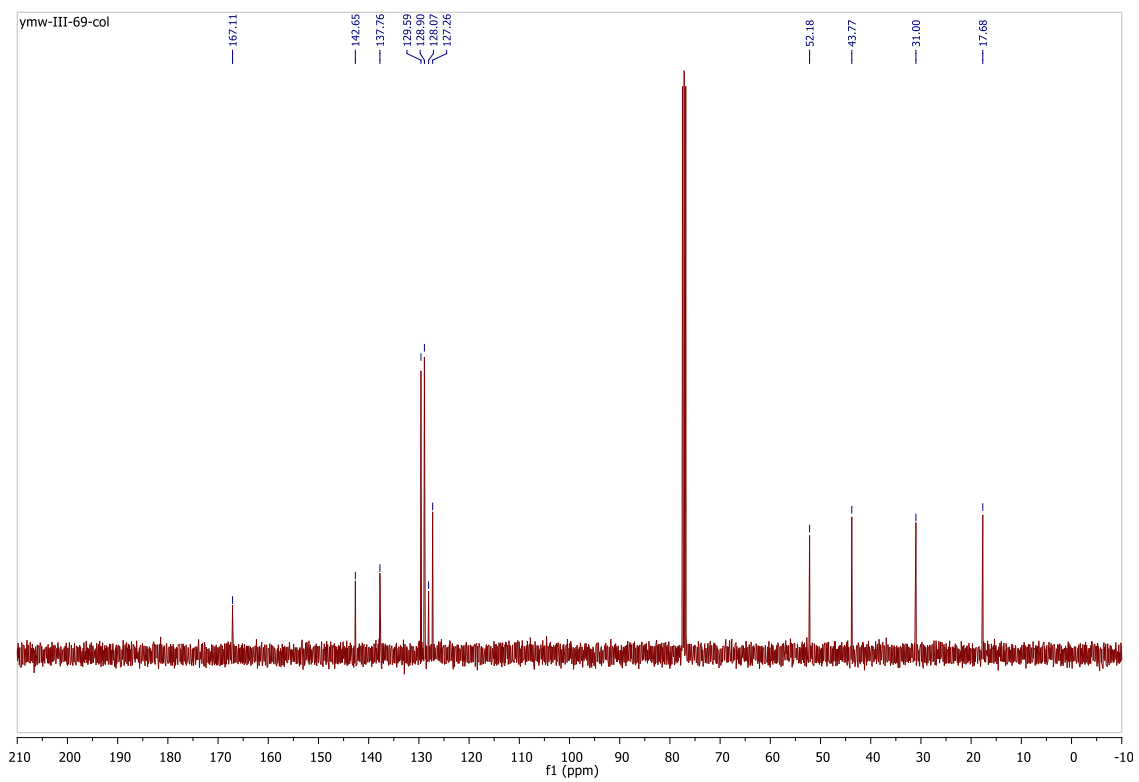

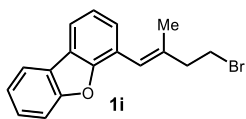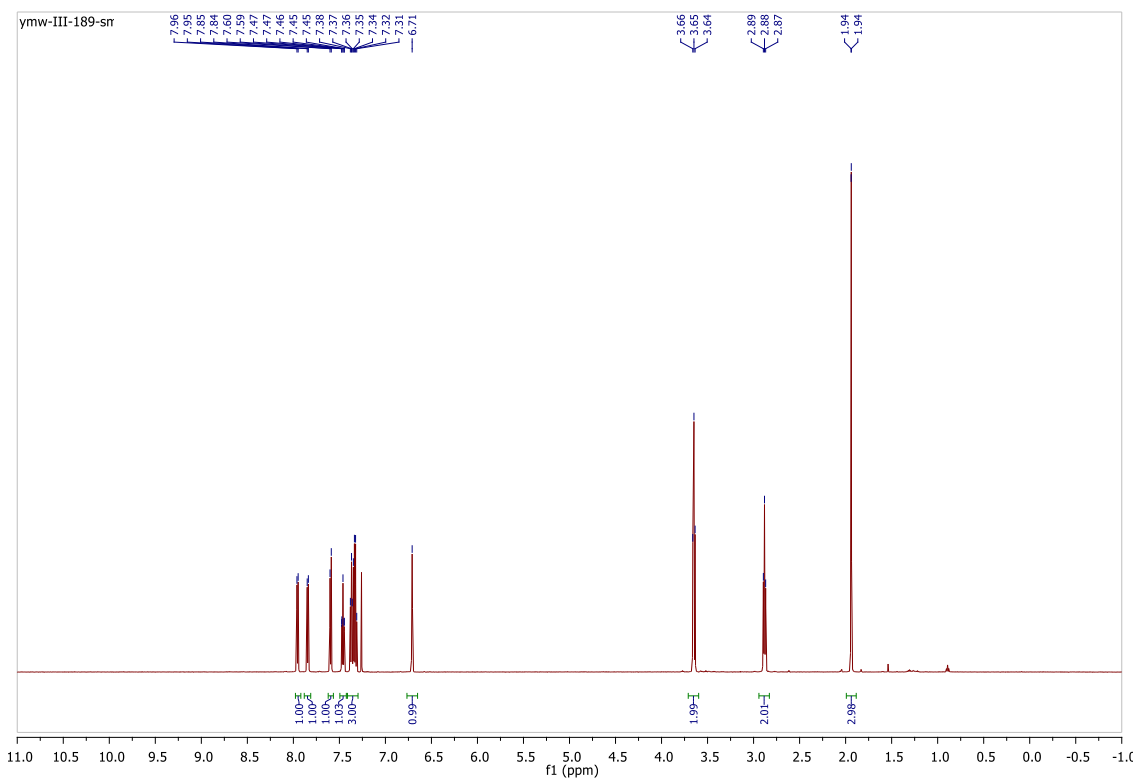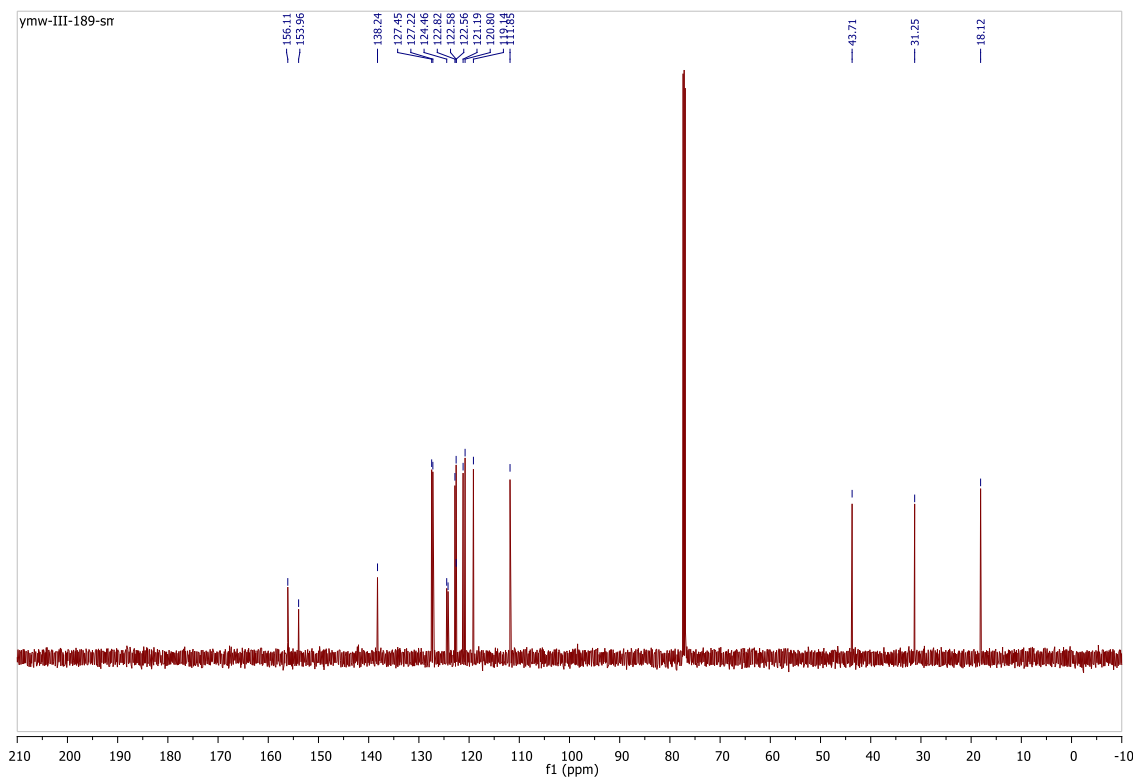

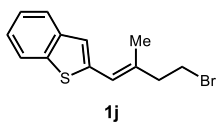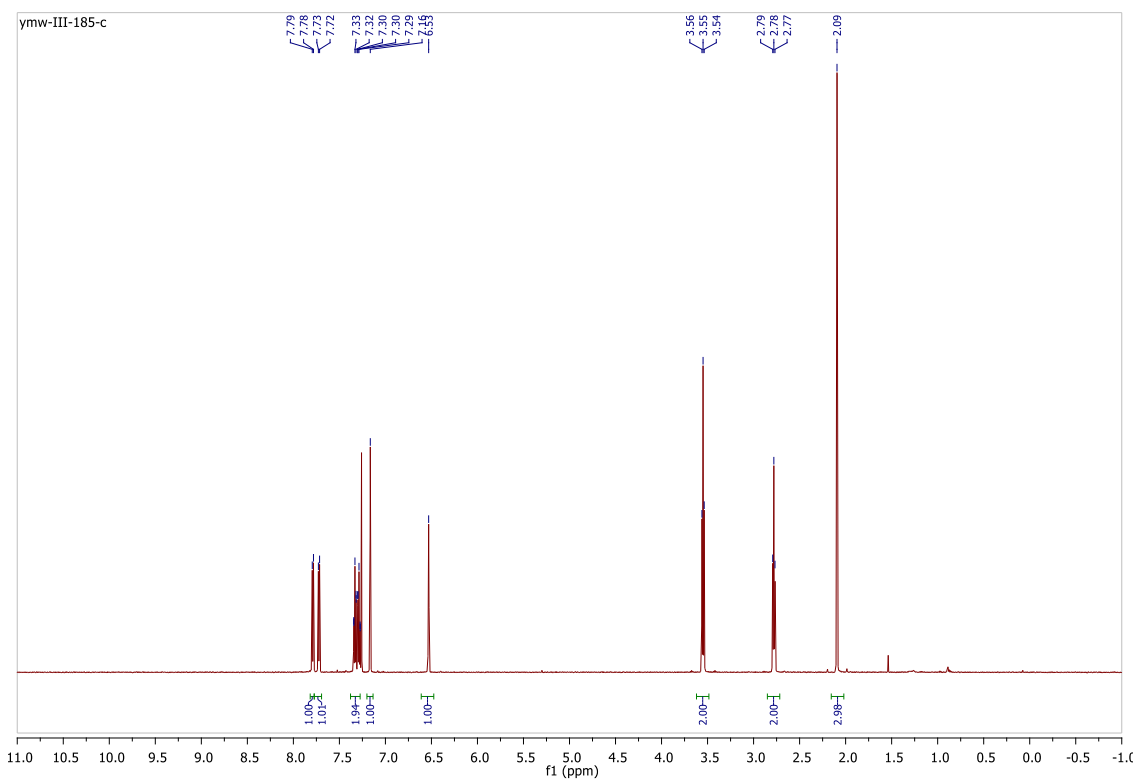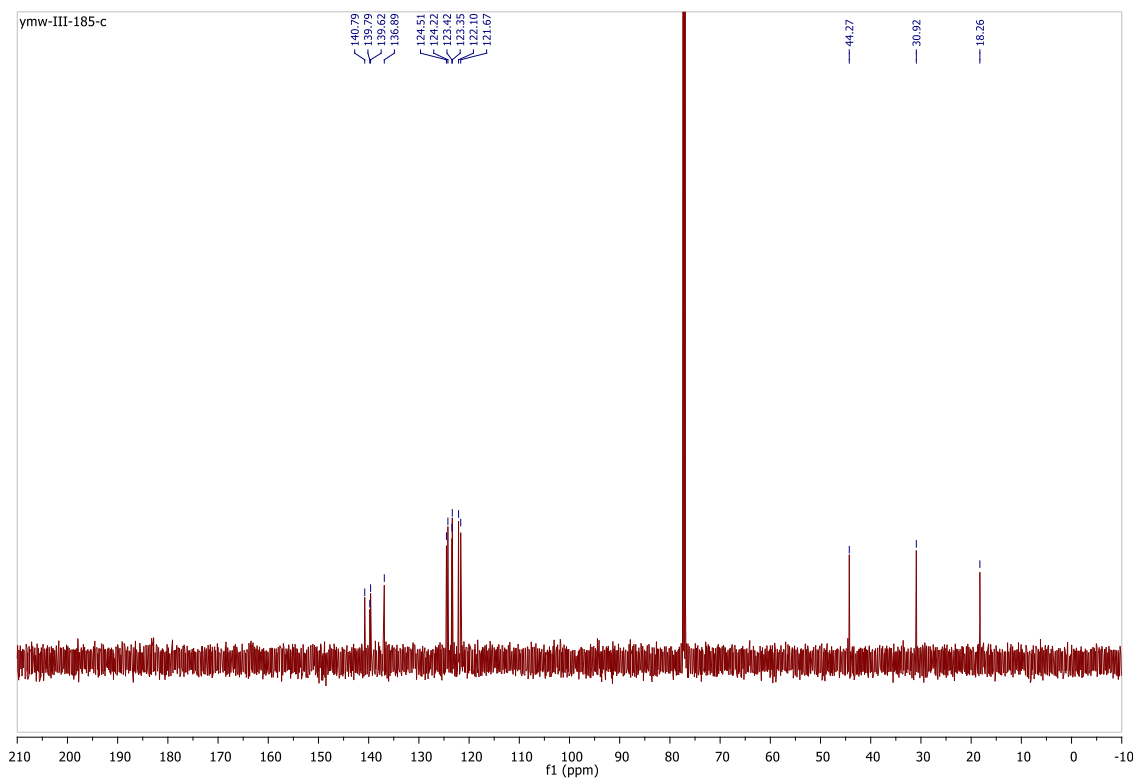

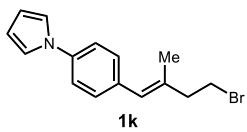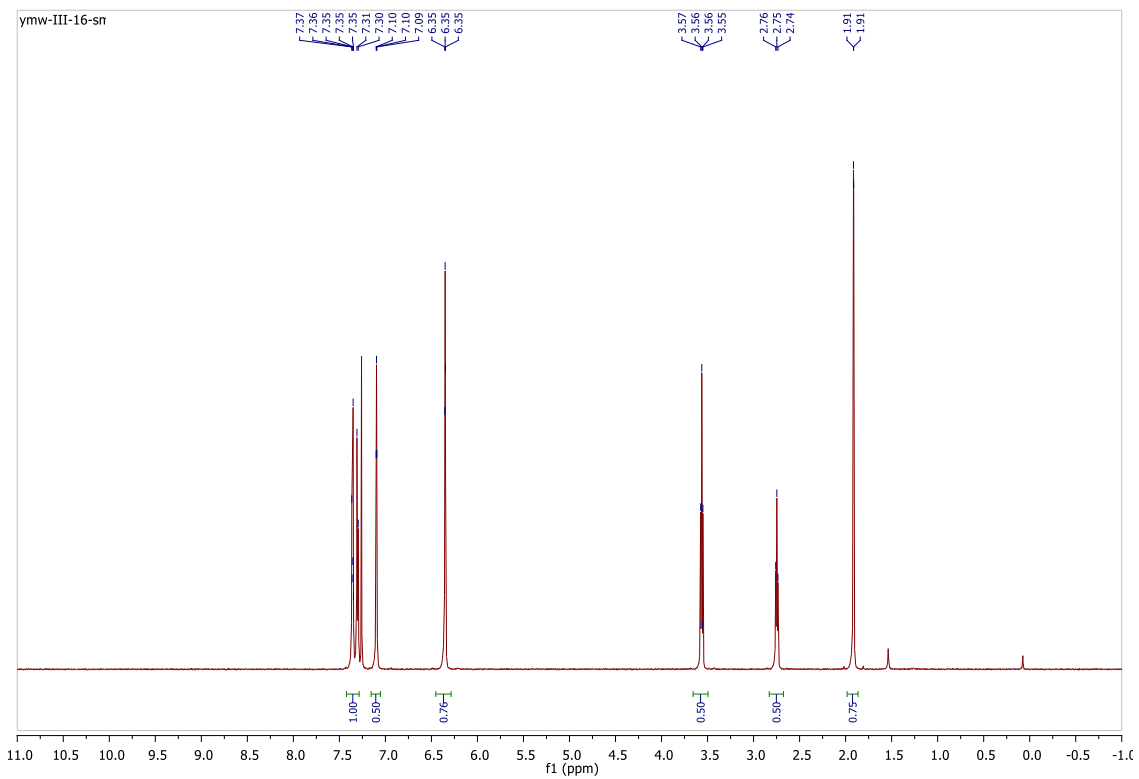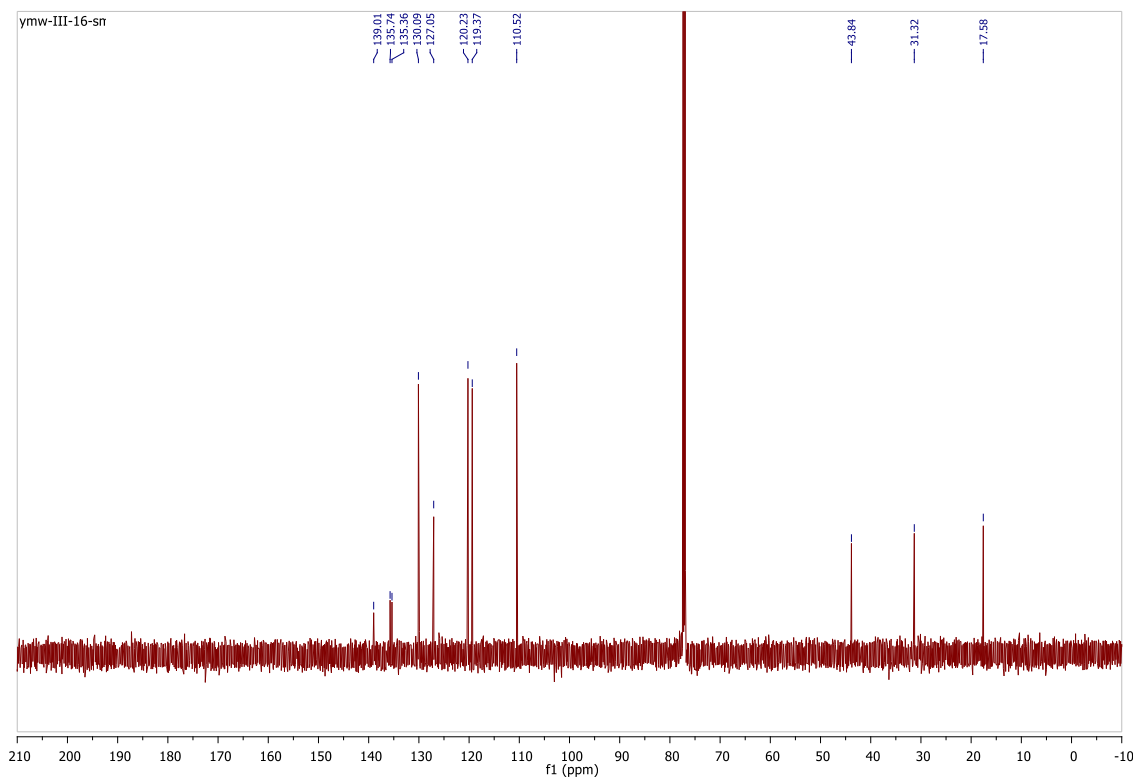

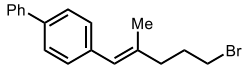

**11**

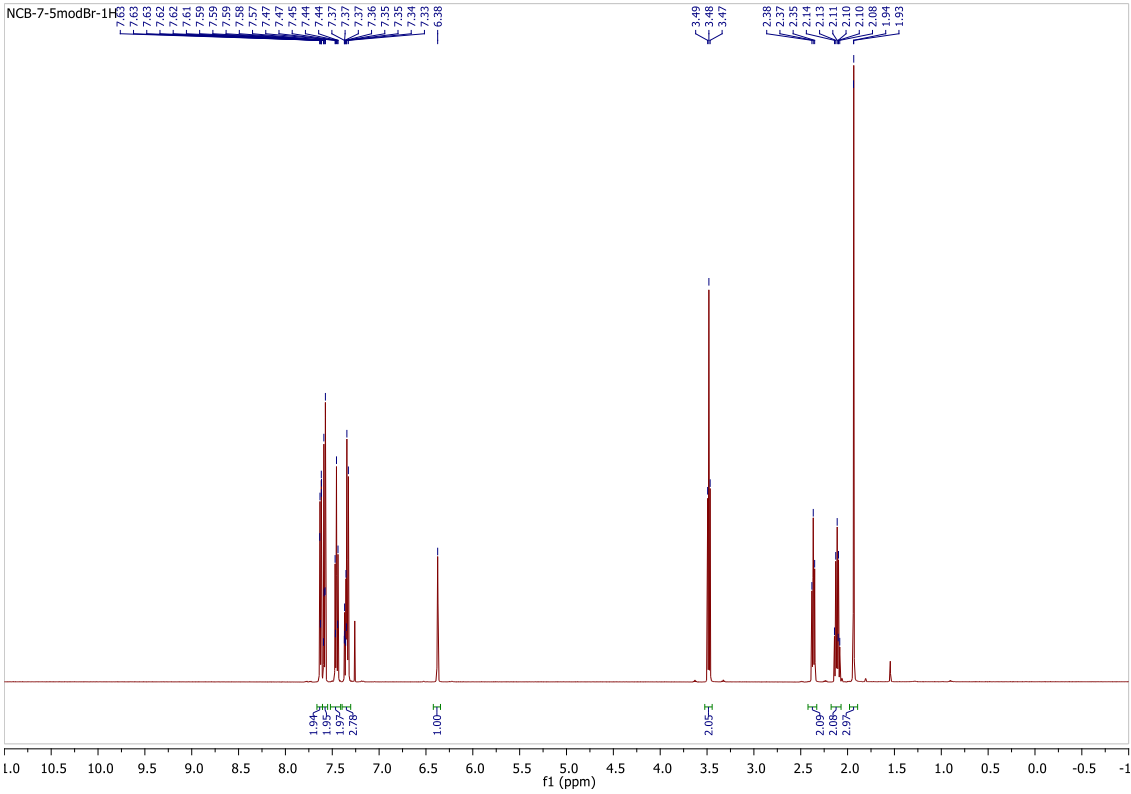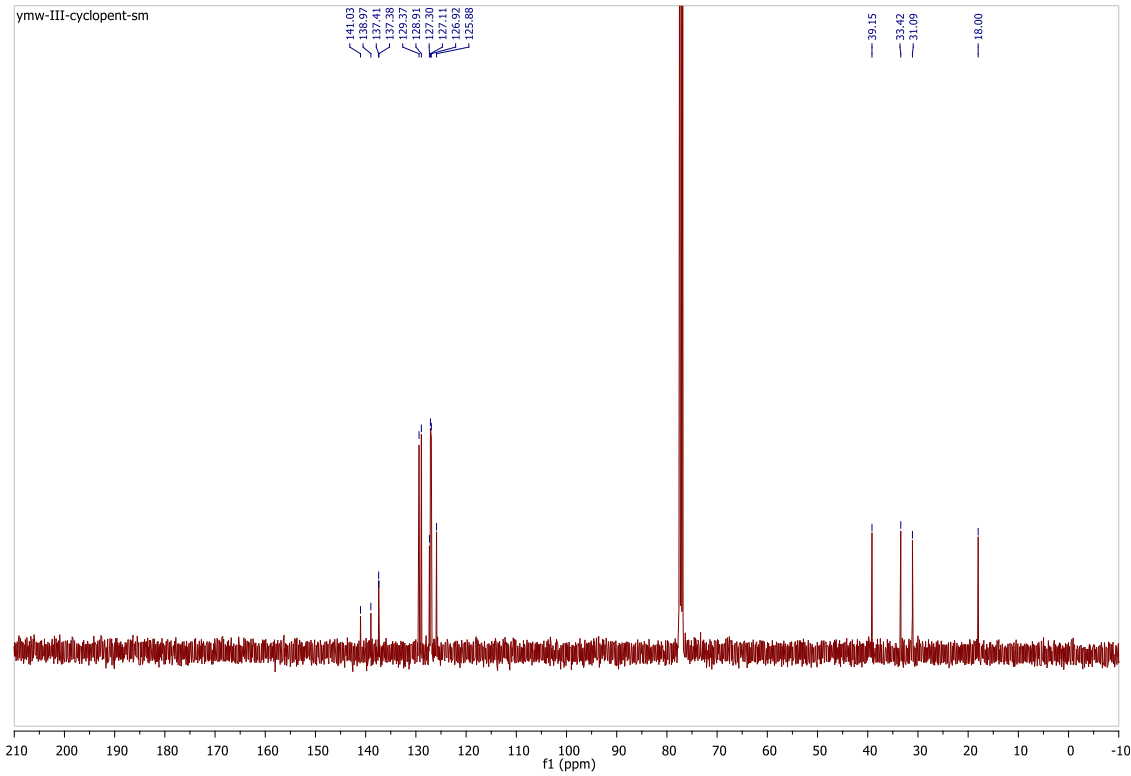

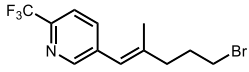

1m

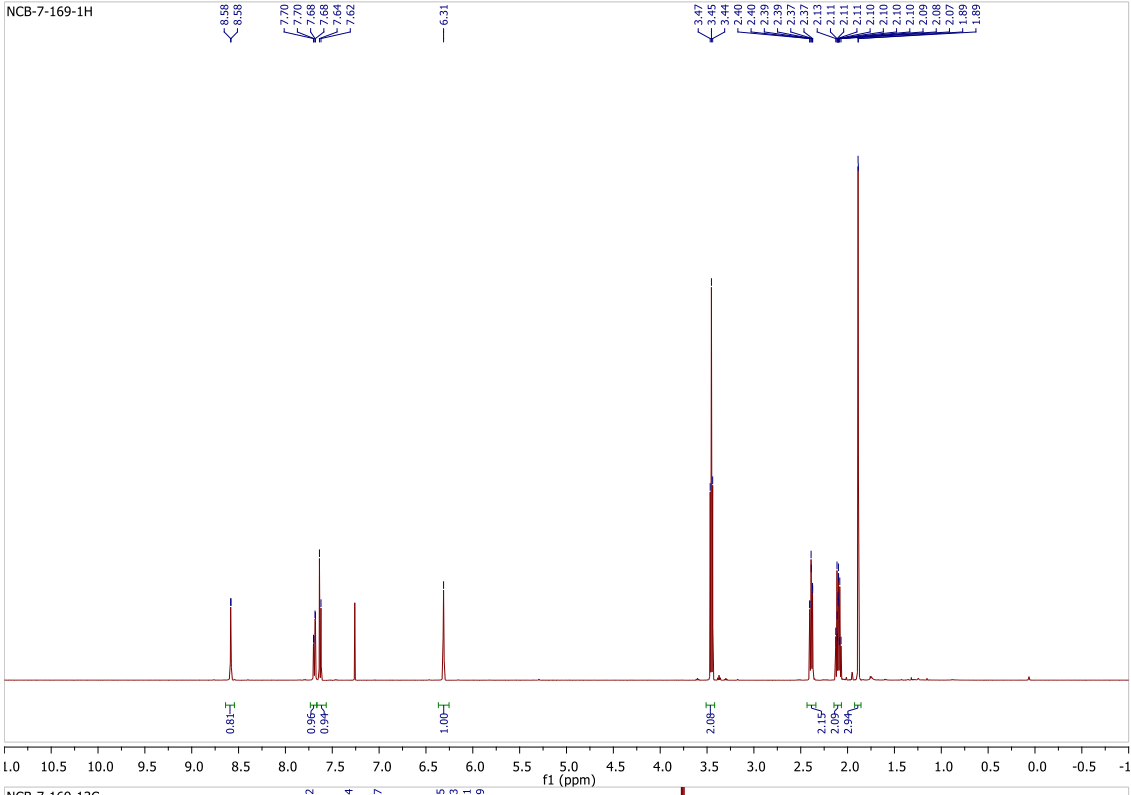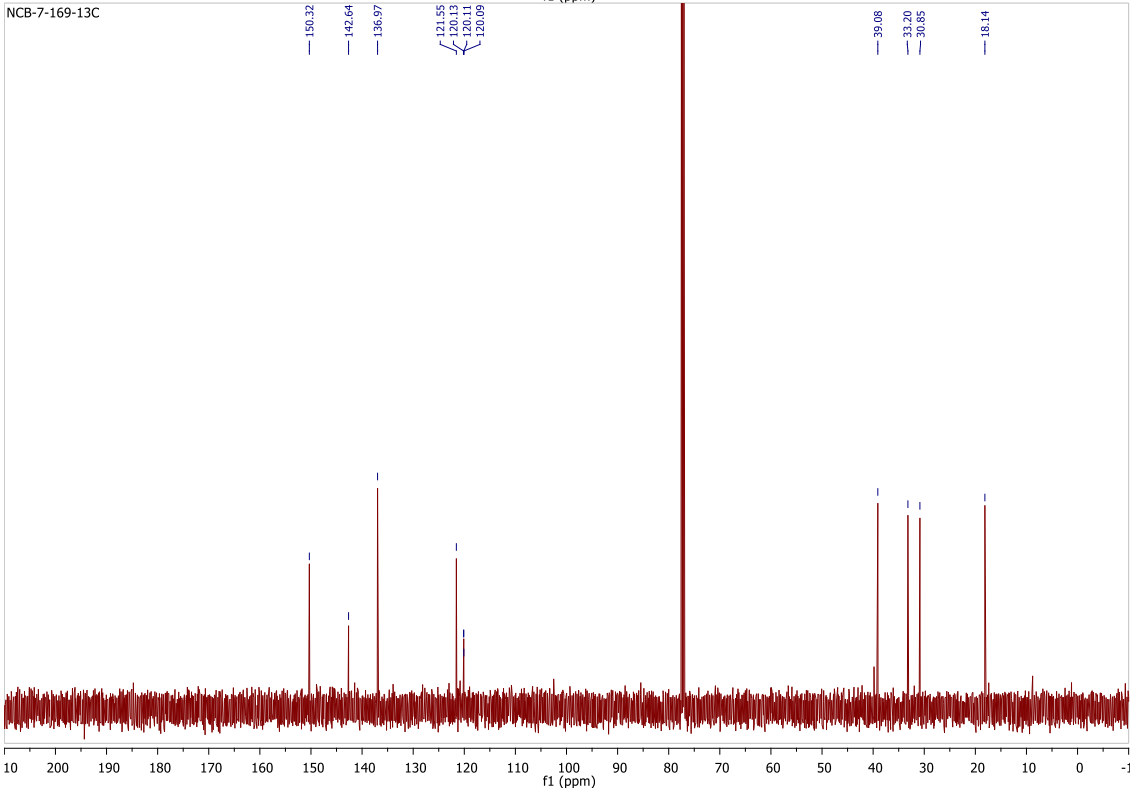



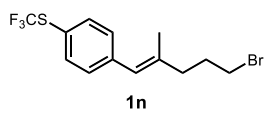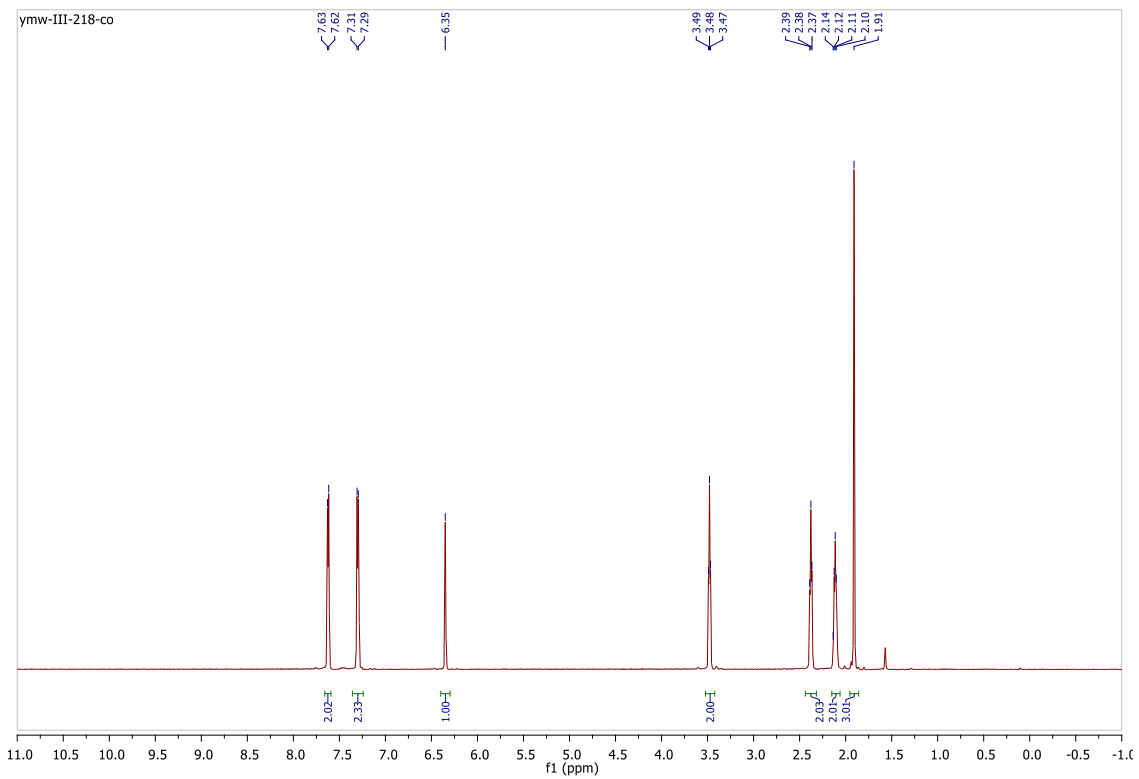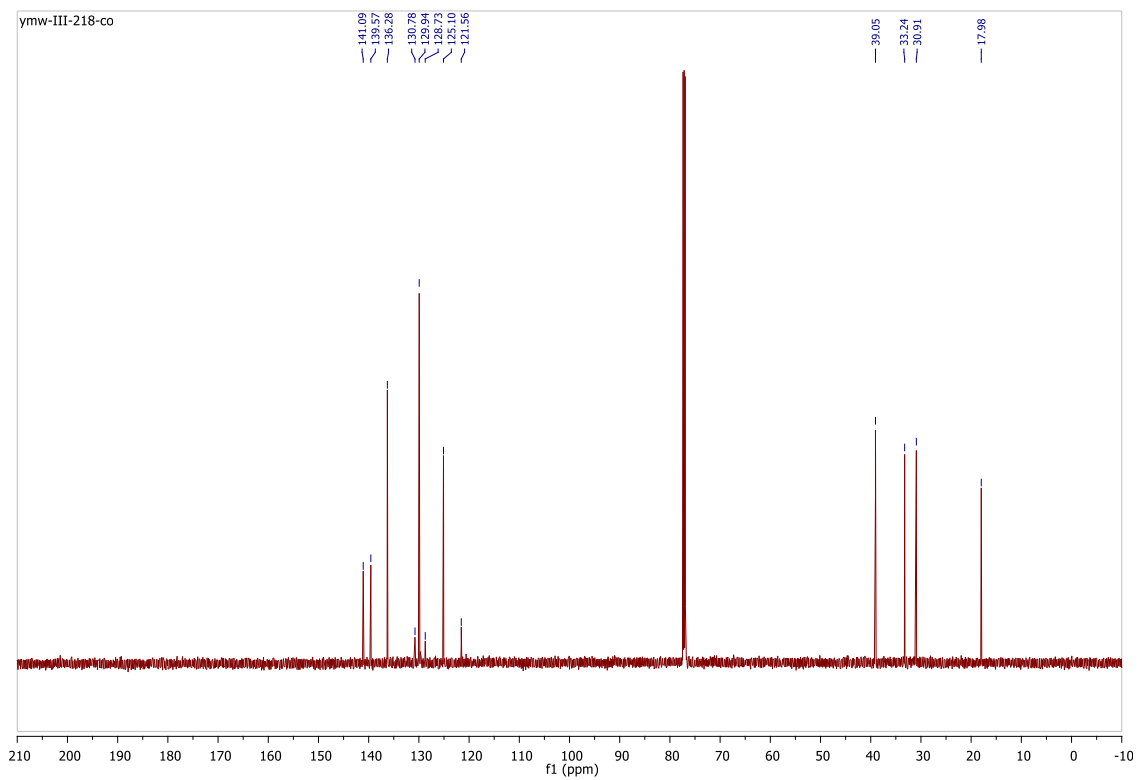

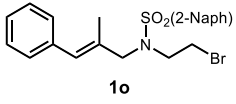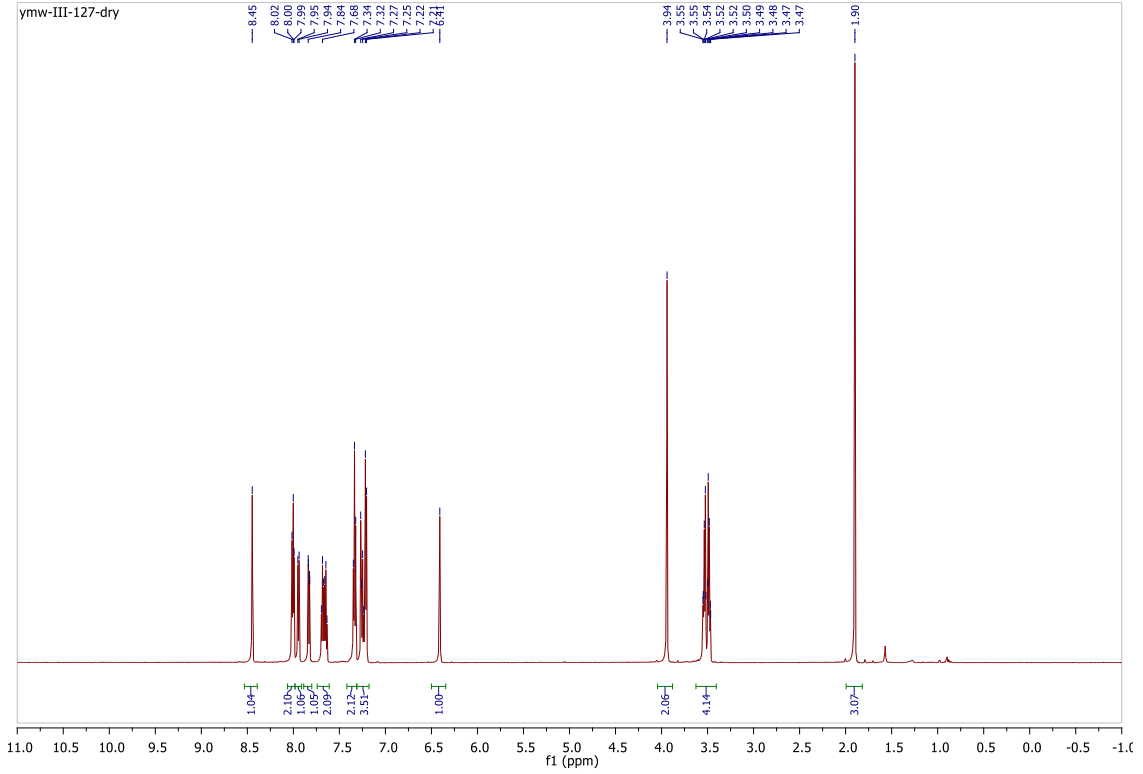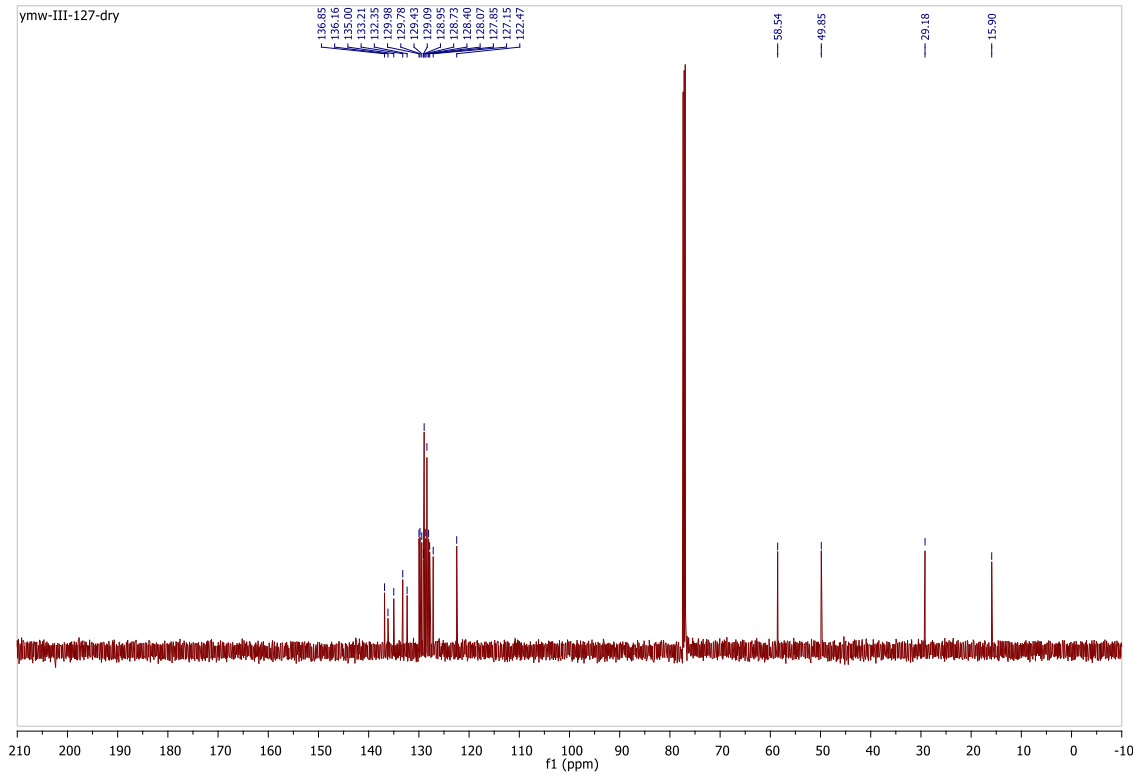

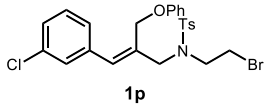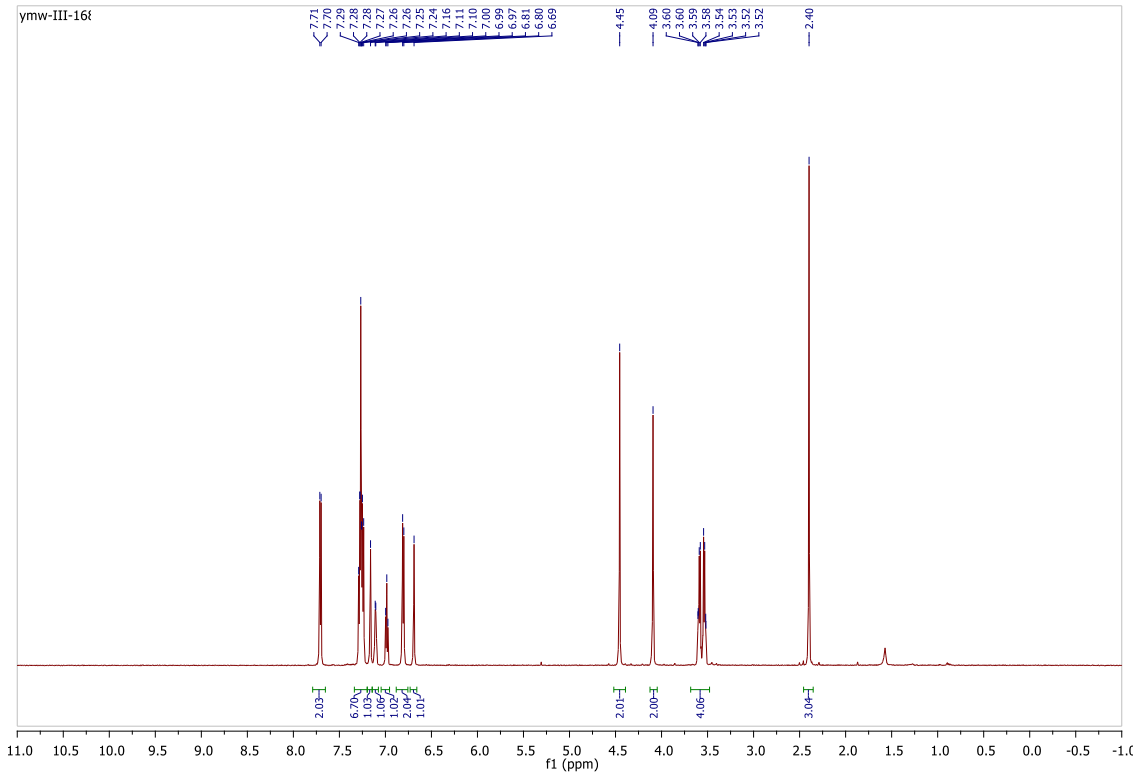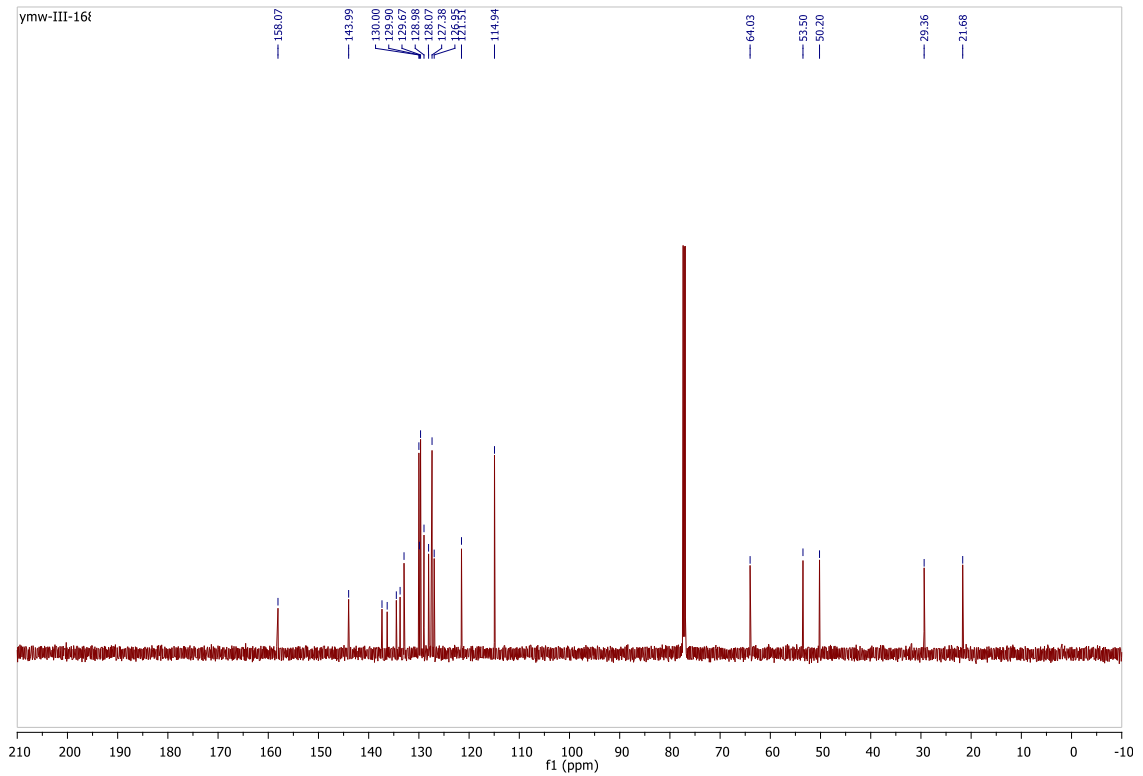

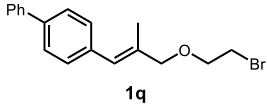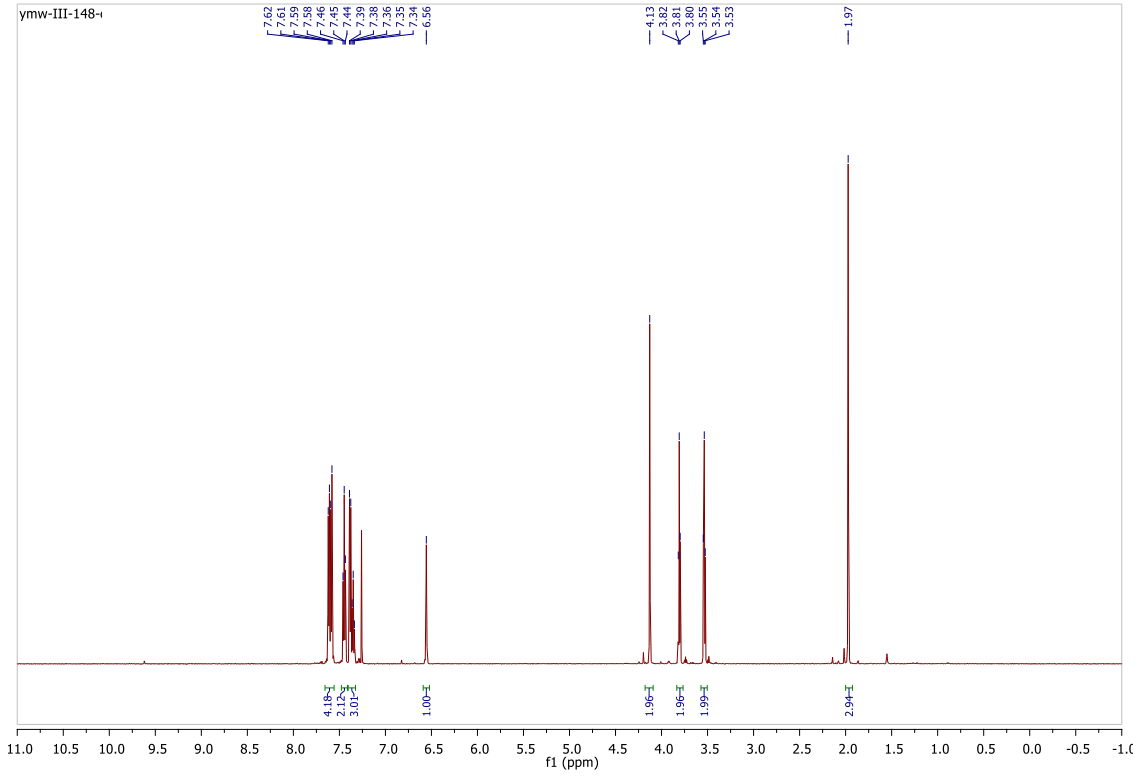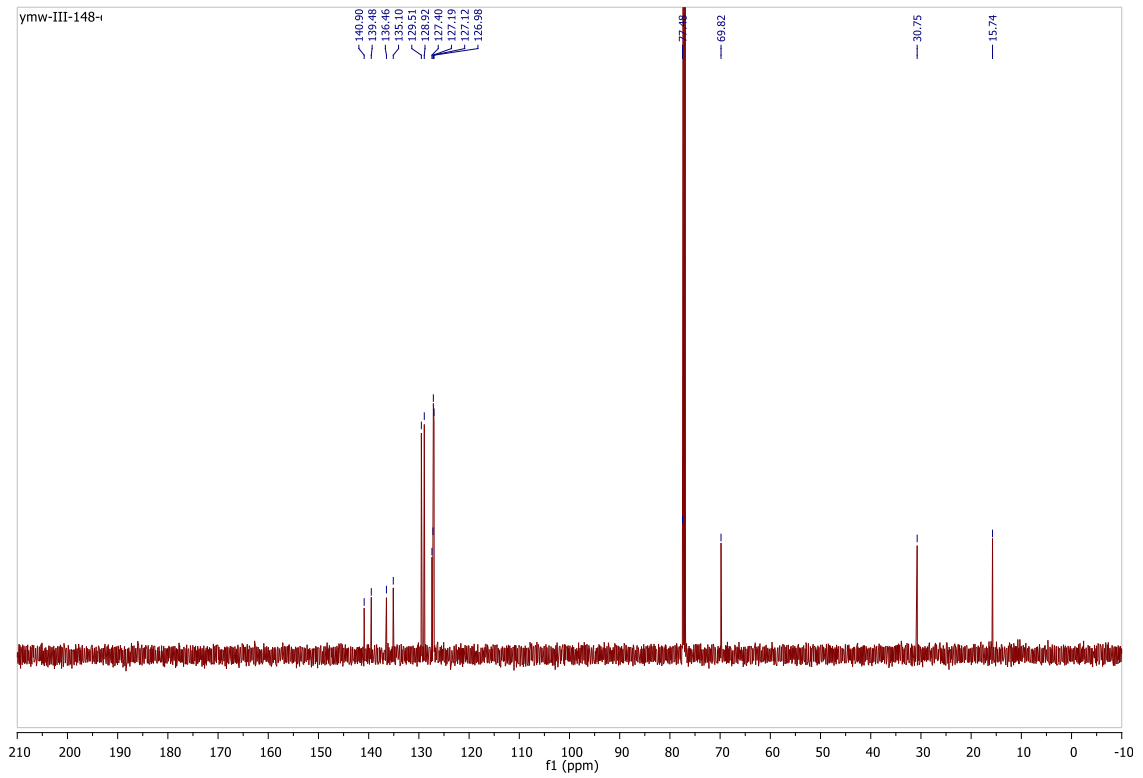

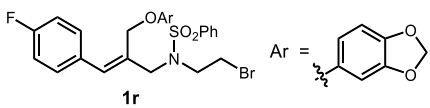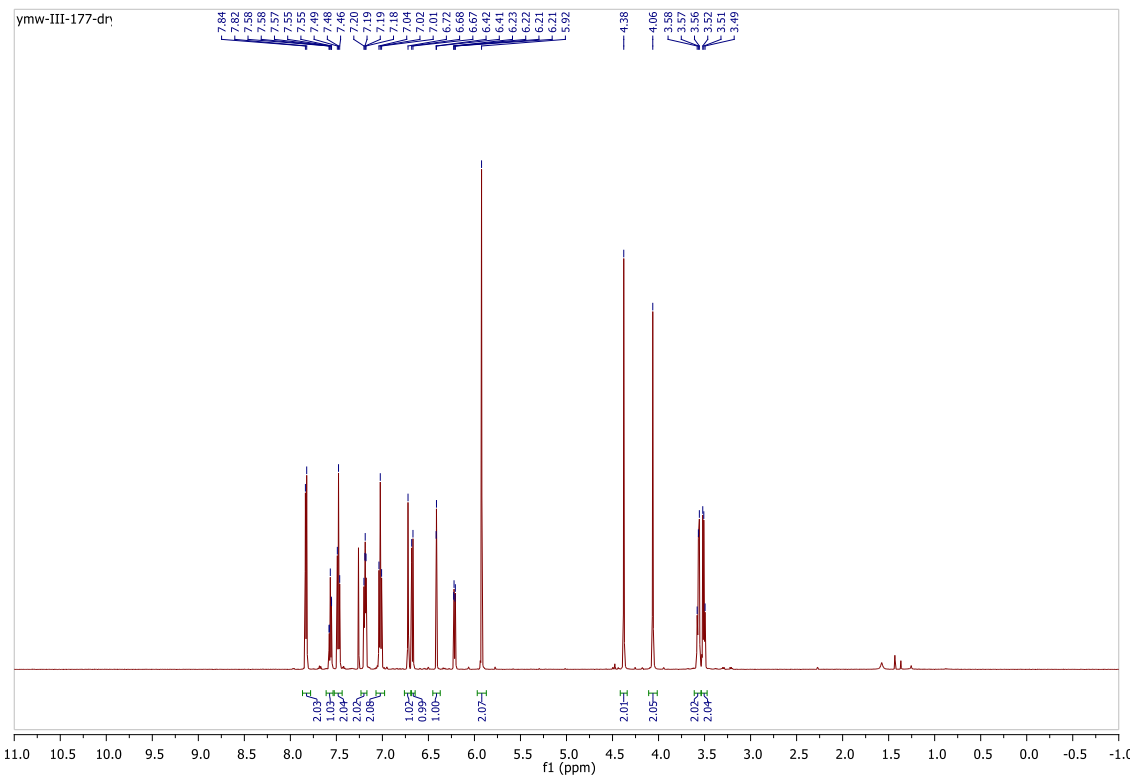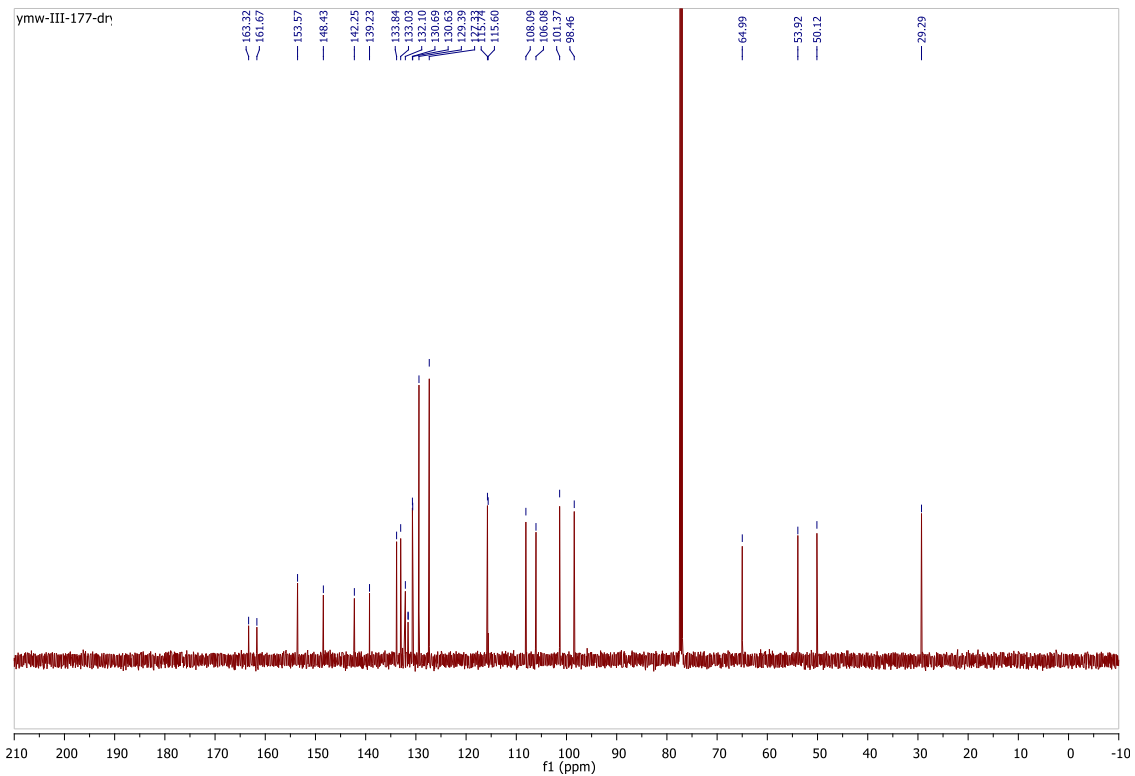

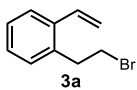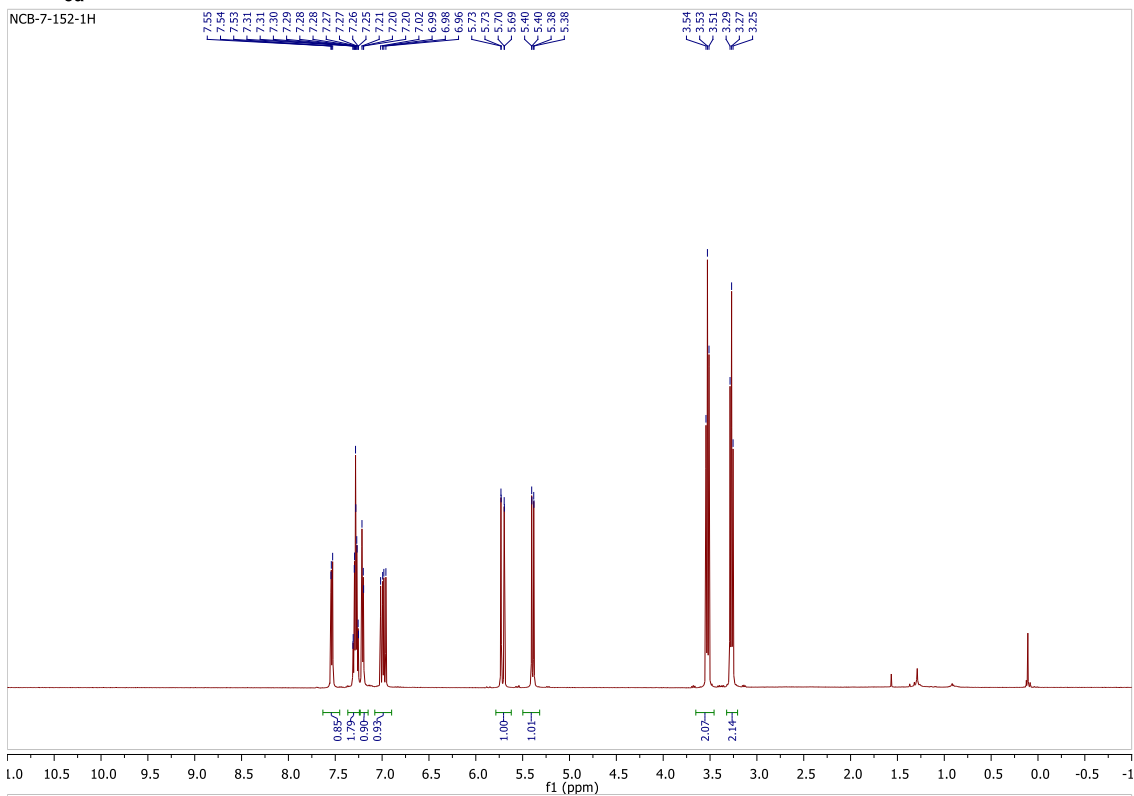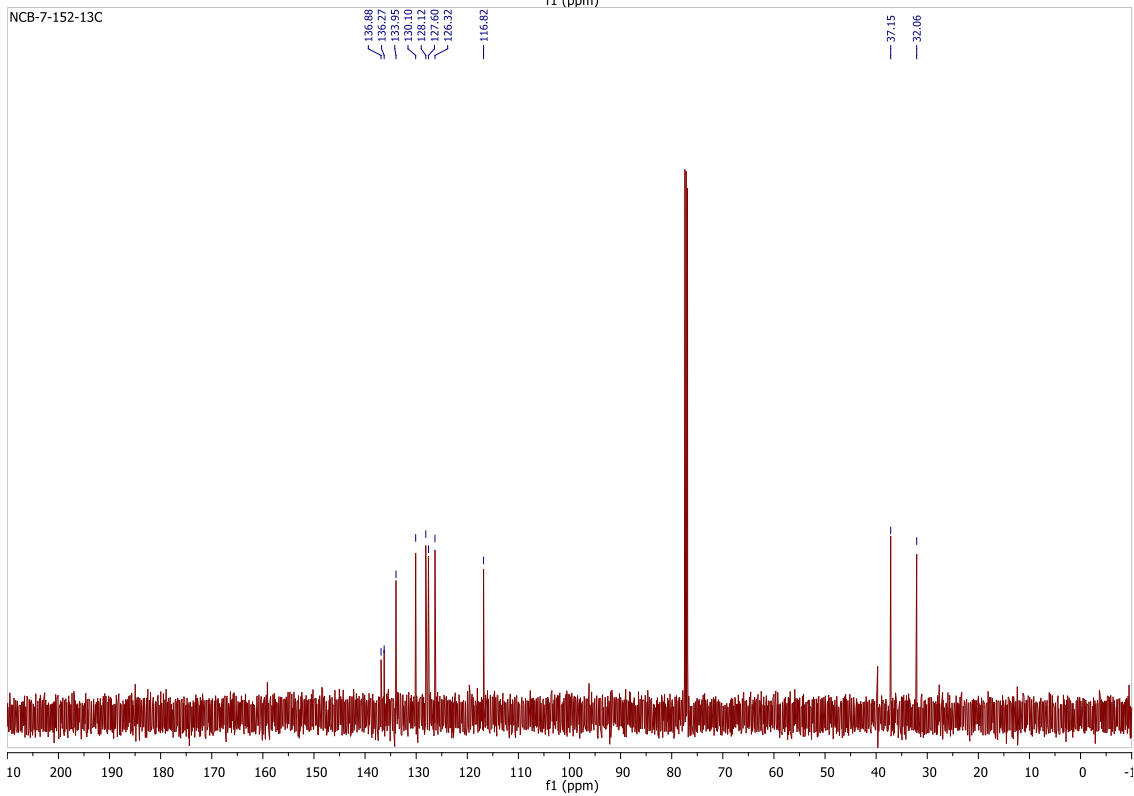

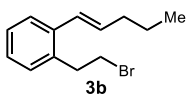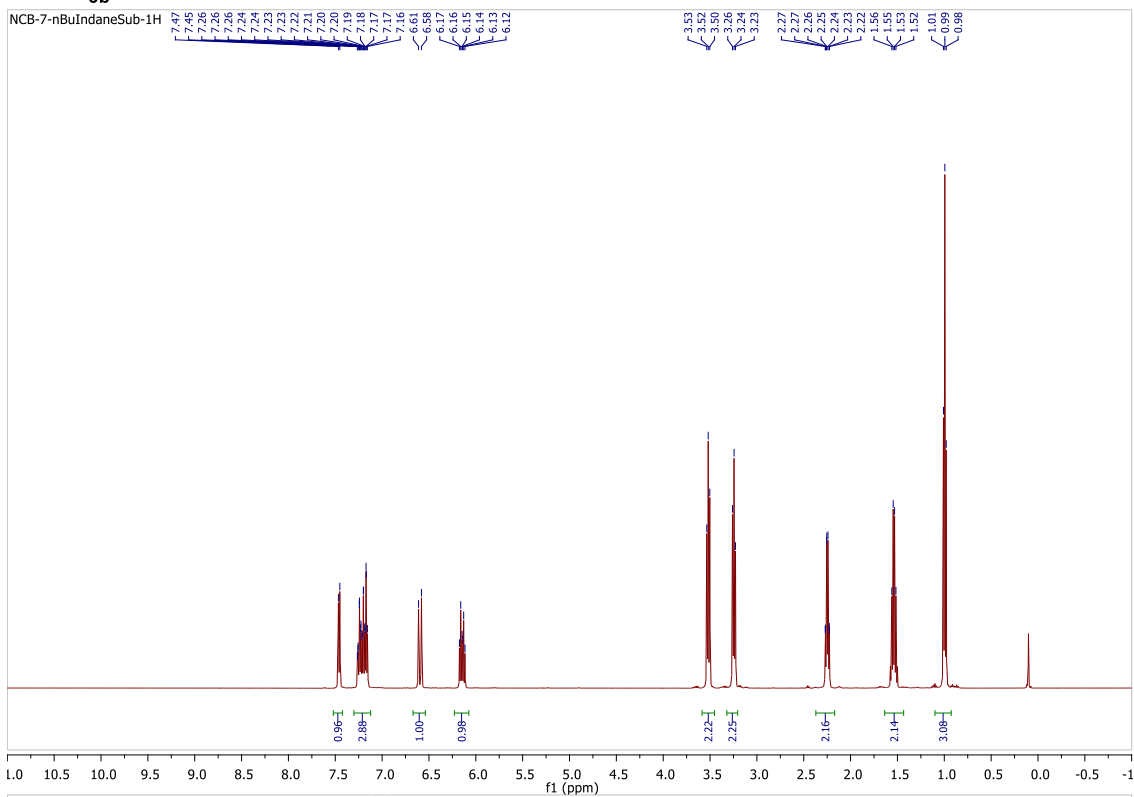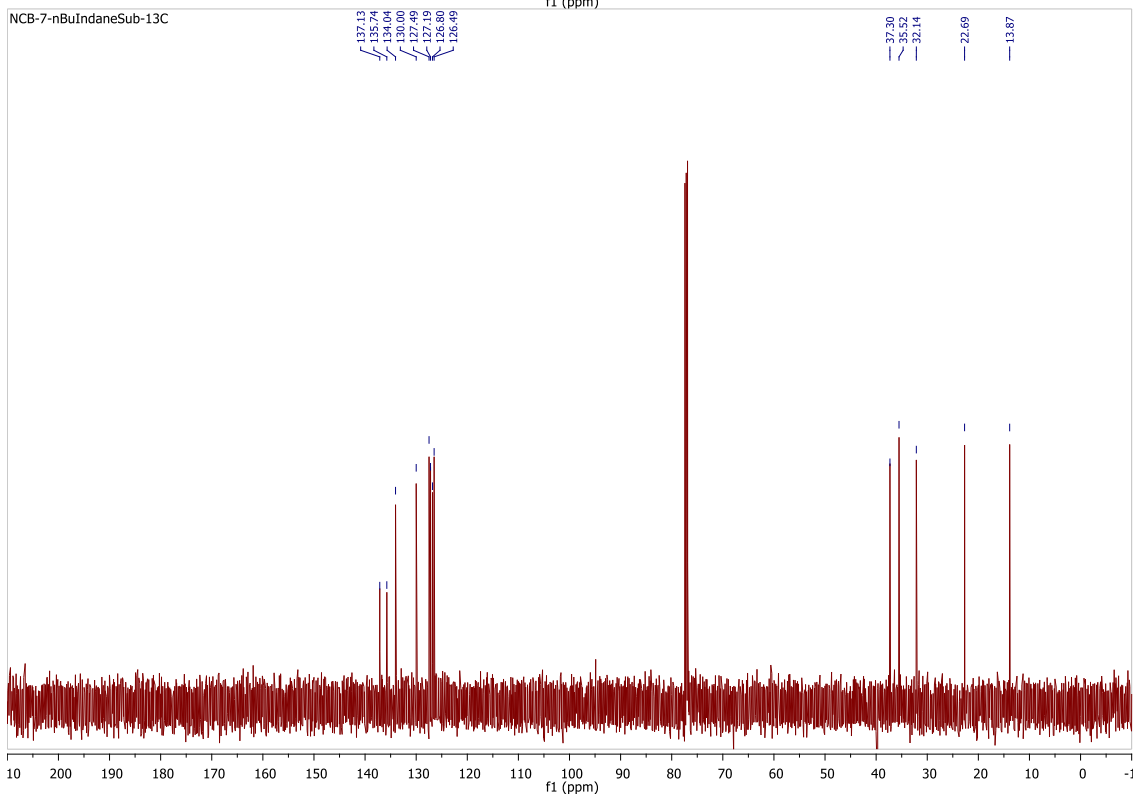

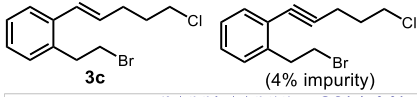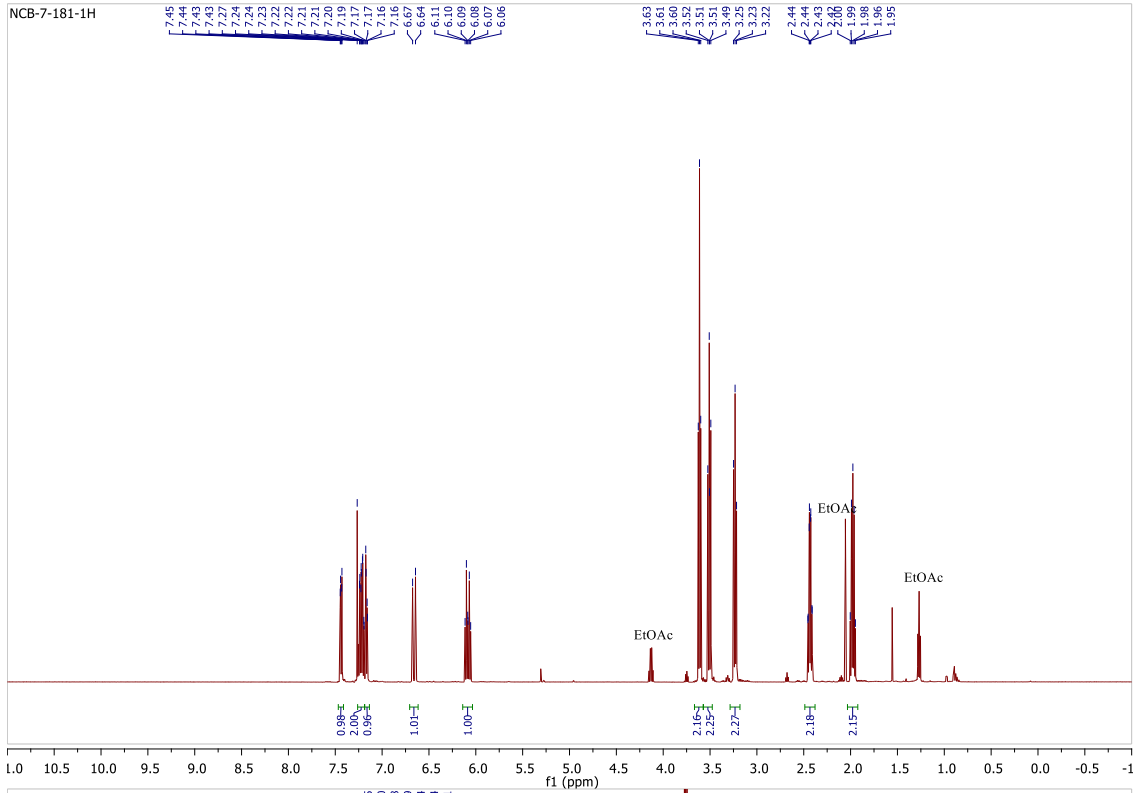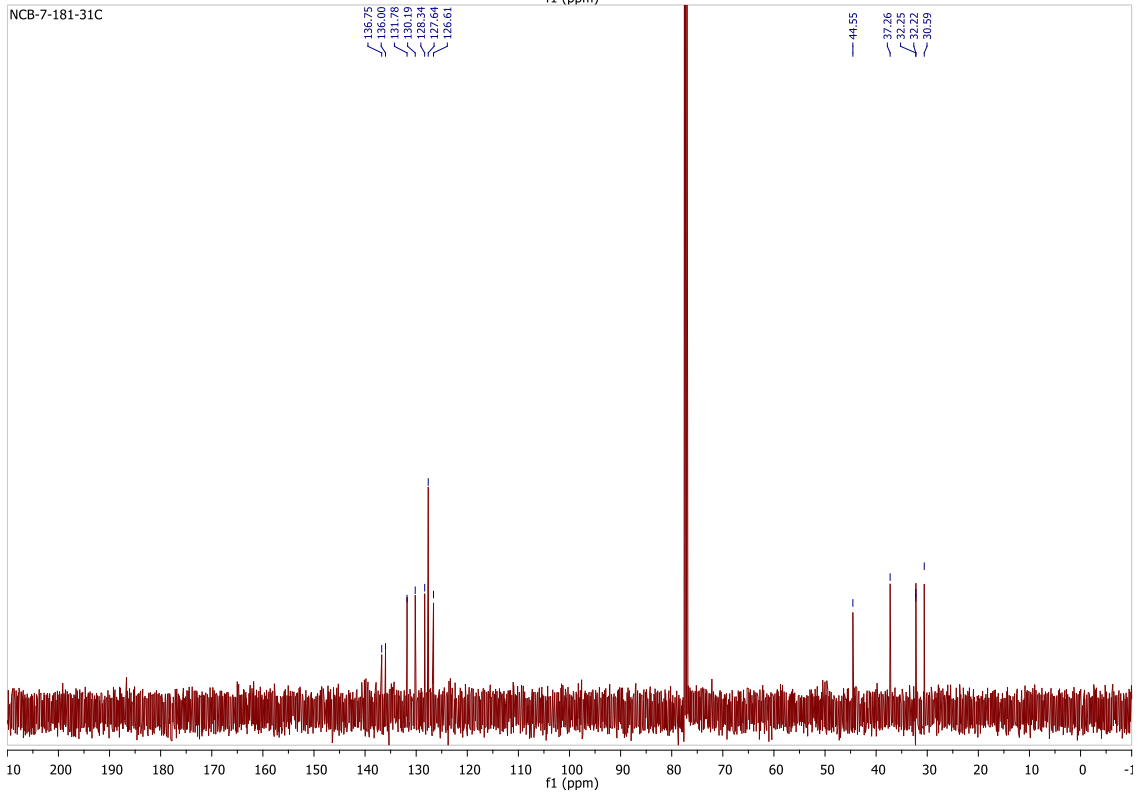



Copies of HPLC and GC traces for **2a – 2r** and **4a – 4c**:

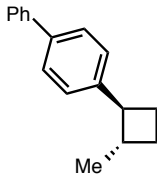

Racemic **2a**:

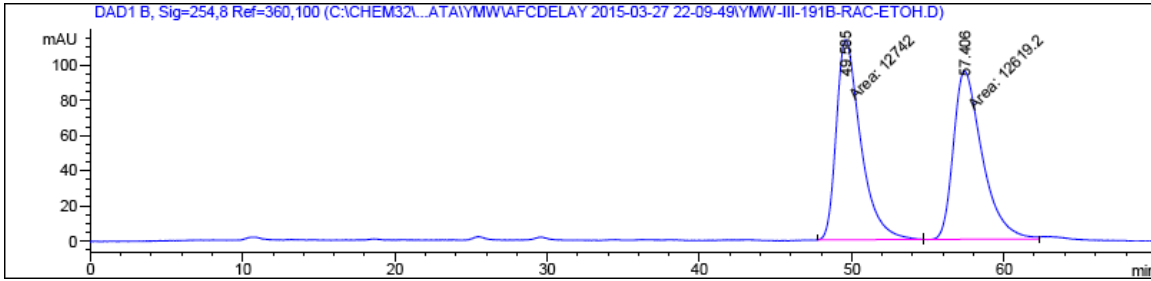

Signal 2: DAD1 B, Sig=254,8 Ref=360,100

| Peak # | RetTime [min] | Type | Width [min] | Area [mAU*s] | Height [mAU] | Area %  |
|--------|---------------|------|-------------|--------------|--------------|---------|
| 1      | 49.585        | MM   | 1.8706      | 1.27420e4    | 113.52948    | 50.2421 |
| 2      | 57.406        | MM   | 2.1991      | 1.26192e4    | 95.63958     | 49.7579 |

Enantioenriched **2a**:

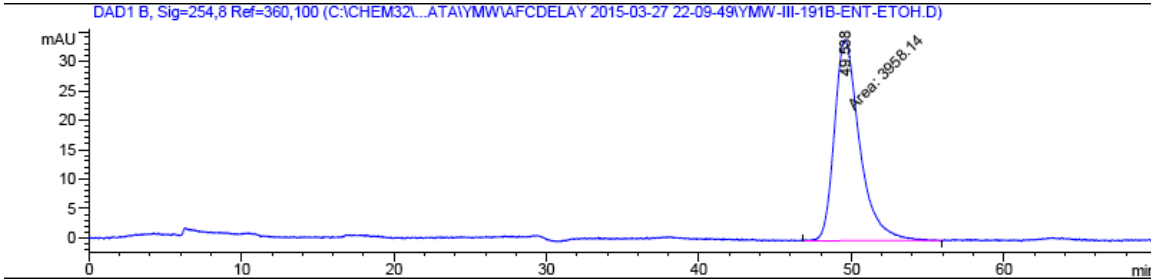

Signal 2: DAD1 B, Sig=254,8 Ref=360,100

| Peak # | RetTime [min] | Type | Width [min] | Area [mAU*s] | Height [mAU] | Area %   |
|--------|---------------|------|-------------|--------------|--------------|----------|
| 1      | 49.538        | MM   | 1.9332      | 3958.13550   | 34.12496     | 100.0000 |

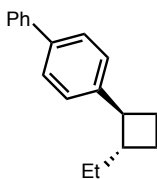

**Racemic 2b:**

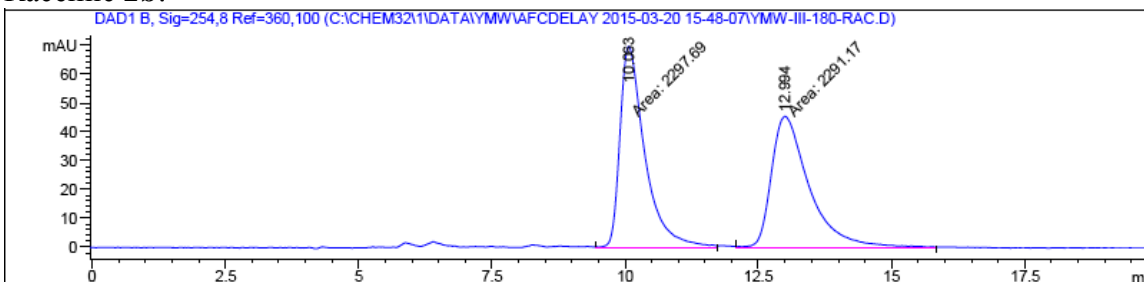

Signal 2: DAD1 B, Sig=254,8 Ref=360,100

| Peak # | RetTime [min] | Type | Width [min] | Area [mAU*s] | Height [mAU] | Area %  |
|--------|---------------|------|-------------|--------------|--------------|---------|
| 1      | 10.063        | MM   | 0.5477      | 2297.68652   | 69.92495     | 50.0710 |
| 2      | 12.994        | MM   | 0.8357      | 2291.17480   | 45.69621     | 49.9290 |

**Enantioenriched 2b:**

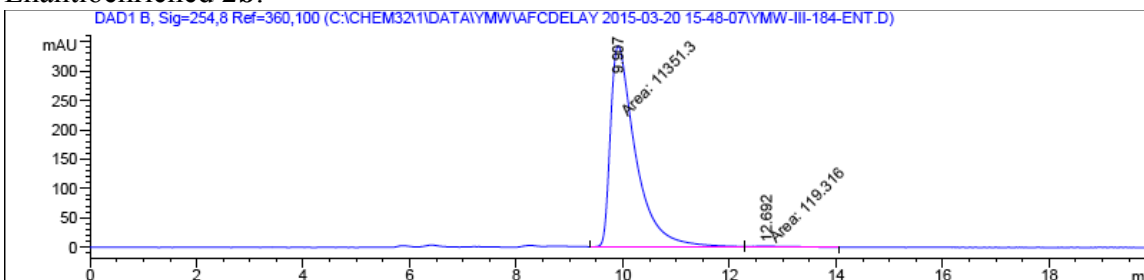

Signal 2: DAD1 B, Sig=254,8 Ref=360,100

| Peak # | RetTime [min] | Type | Width [min] | Area [mAU*s] | Height [mAU] | Area %  |
|--------|---------------|------|-------------|--------------|--------------|---------|
| 1      | 9.907         | MF   | 0.5516      | 1.13513e4    | 342.95947    | 98.9598 |
| 2      | 12.692        | FM   | 1.0049      | 119.31648    | 1.97901      | 1.0402  |

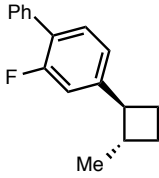

**Racemic 2c:**

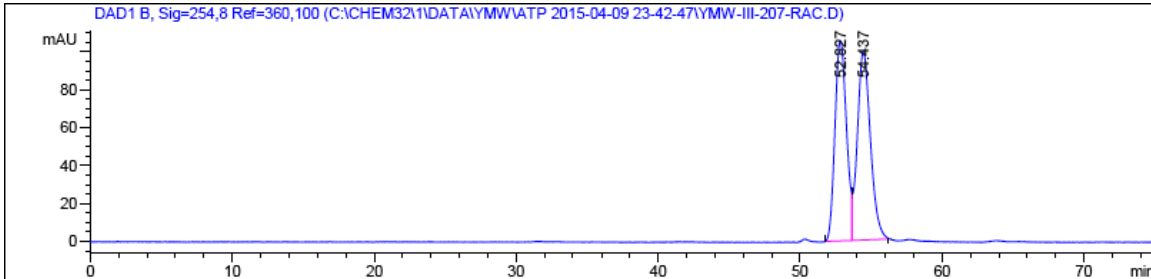

Signal 2: DAD1 B, Sig=254,8 Ref=360,100

| Peak # | RetTime [min] | Type | Width [min] | Area [mAU*s] | Height [mAU] | Area %  |
|--------|---------------|------|-------------|--------------|--------------|---------|
| 1      | 52.827        | BV   | 0.8311      | 5952.37939   | 105.67712    | 48.2572 |
| 2      | 54.437        | VB   | 0.8125      | 6382.31982   | 99.74817     | 51.7428 |

**Enantioenriched 2c:**

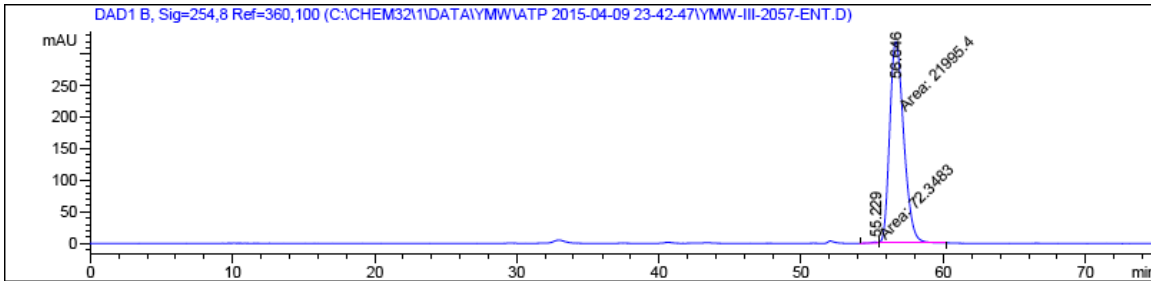

Signal 2: DAD1 B, Sig=254,8 Ref=360,100

| Peak # | RetTime [min] | Type | Width [min] | Area [mAU*s] | Height [mAU] | Area %  |
|--------|---------------|------|-------------|--------------|--------------|---------|
| 1      | 55.229        | MF   | 0.6439      | 72.34834     | 1.87269      | 0.3278  |
| 2      | 56.646        | FM   | 1.1454      | 2.19954e4    | 320.05380    | 99.6722 |

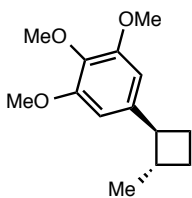

Racemic **2d**:

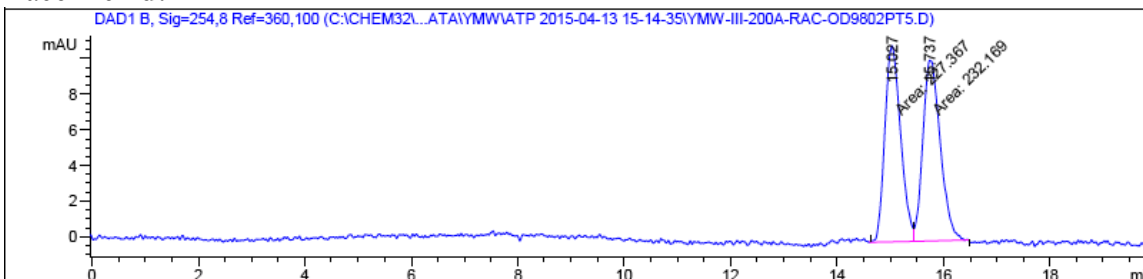

Signal 2: DAD1 B, Sig=254,8 Ref=360,100

| Peak # | RetTime [min] | Type | Width [min] | Area [mAU*s] | Height [mAU] | Area %  |
|--------|---------------|------|-------------|--------------|--------------|---------|
| 1      | 15.027        | MF   | 0.3443      | 227.36719    | 11.00466     | 49.4775 |
| 2      | 15.737        | FM   | 0.3814      | 232.16902    | 10.14473     | 50.5225 |

Enantioenriched **2d**:

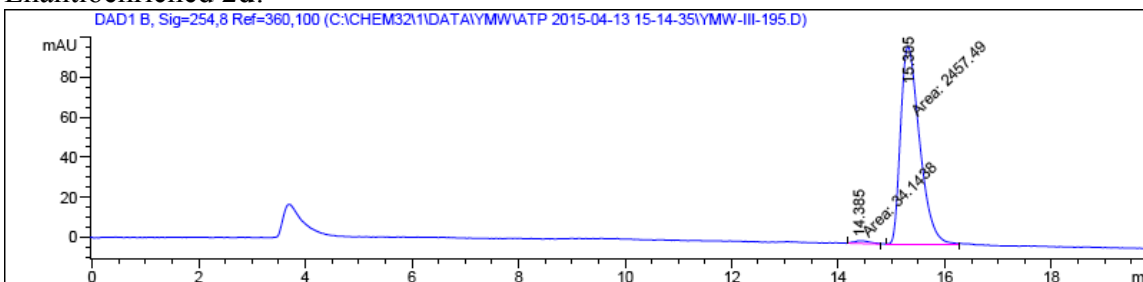

Signal 2: DAD1 B, Sig=254,8 Ref=360,100

| Peak # | RetTime [min] | Type | Width [min] | Area [mAU*s] | Height [mAU] | Area %  |
|--------|---------------|------|-------------|--------------|--------------|---------|
| 1      | 14.385        | MM   | 0.3673      | 34.14381     | 1.54928      | 1.3703  |
| 2      | 15.305        | MM   | 0.4138      | 2457.49316   | 98.97387     | 98.6297 |

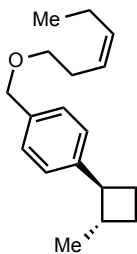

Racemic **2e**:

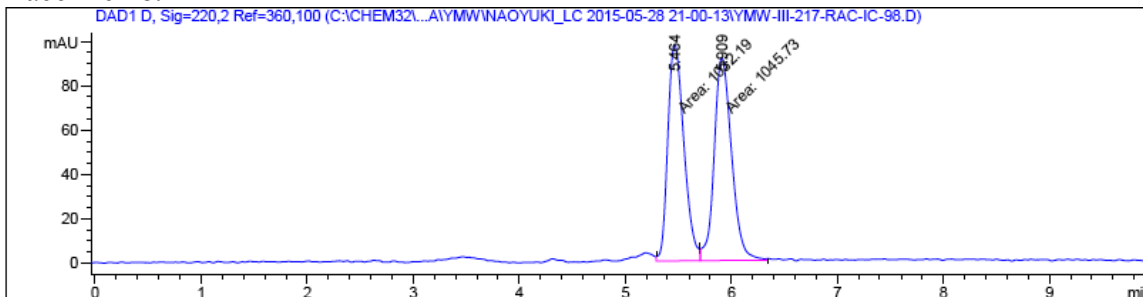

Signal 4: DAD1 D, Sig=220,2 Ref=360,100

| Peak # | RetTime [min] | Type | Width [min] | Area [mAU*s] | Height [mAU] | Area %  |
|--------|---------------|------|-------------|--------------|--------------|---------|
| 1      | 5.464         | MF   | 0.1763      | 1032.18616   | 97.59855     | 49.6740 |
| 2      | 5.909         | FM   | 0.1905      | 1045.73462   | 91.49982     | 50.3260 |

Enantioenriched **2e**:

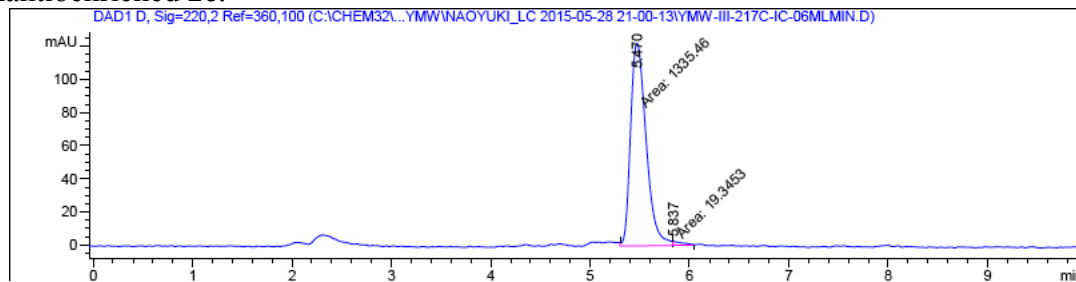

Signal 4: DAD1 D, Sig=220,2 Ref=360,100

| Peak # | RetTime [min] | Type | Width [min] | Area [mAU*s] | Height [mAU] | Area %  |
|--------|---------------|------|-------------|--------------|--------------|---------|
| 1      | 5.470         | MF   | 0.1820      | 1335.45801   | 122.30920    | 98.5721 |
| 2      | 5.837         | FM   | 0.1198      | 19.34533     | 2.69174      | 1.4279  |

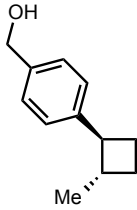

**Racemic 2f:**

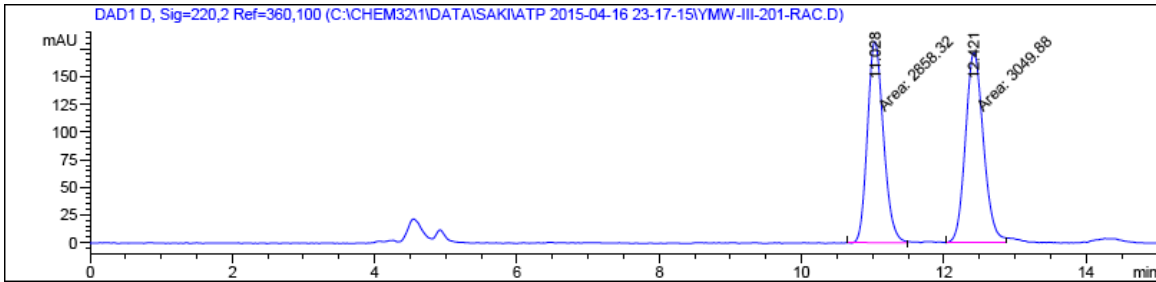

Signal 4: DAD1 D, Sig=220,2 Ref=360,100

| Peak # | RetTime [min] | Type | Width [min] | Area [mAU*s] | Height [mAU] | Area %  |
|--------|---------------|------|-------------|--------------|--------------|---------|
| 1      | 11.028        | MM   | 0.2620      | 2858.32471   | 181.85948    | 48.3789 |
| 2      | 12.421        | MF   | 0.2953      | 3049.88428   | 172.13083    | 51.6211 |

**Enantioenriched 2f:**

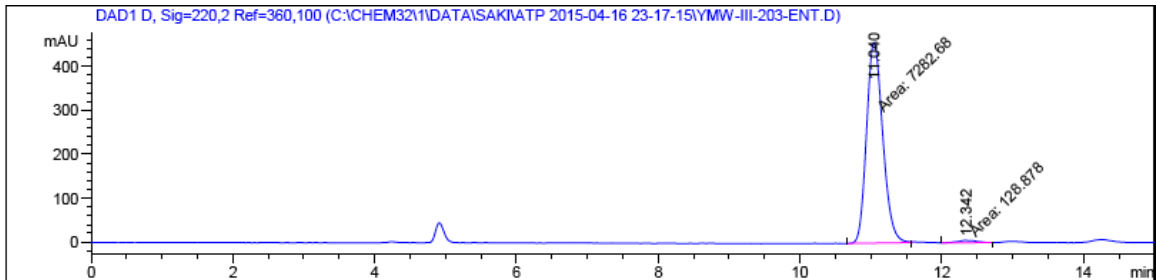

Signal 4: DAD1 D, Sig=220,2 Ref=360,100

| Peak # | RetTime [min] | Type | Width [min] | Area [mAU*s] | Height [mAU] | Area %  |
|--------|---------------|------|-------------|--------------|--------------|---------|
| 1      | 11.040        | MM   | 0.2657      | 7282.67578   | 456.87079    | 98.2611 |
| 2      | 12.342        | MM   | 0.3692      | 128.87827    | 5.81869      | 1.7389  |

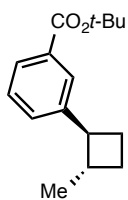

**Racemic 2g:**

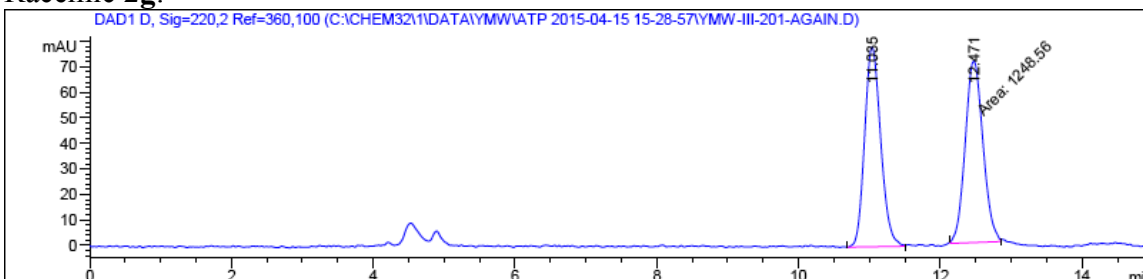

Signal 4: DAD1 D, Sig=220,2 Ref=360,100

| Peak # | RetTime [min] | Type | Width [min] | Area [mAU*s] | Height [mAU] | Area %  |
|--------|---------------|------|-------------|--------------|--------------|---------|
| 1      | 11.035        | VV   | 0.2465      | 1240.81665   | 78.44220     | 49.8445 |
| 2      | 12.471        | MM   | 0.2922      | 1248.55884   | 71.21598     | 50.1555 |

**Enantioenriched 2g:**

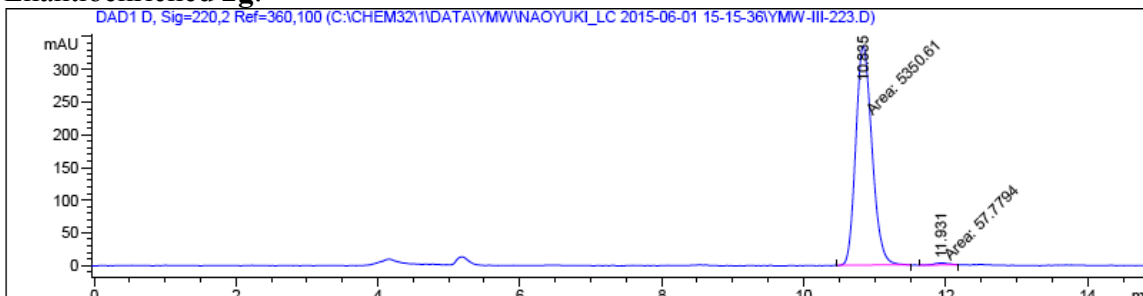

Signal 4: DAD1 D, Sig=220,2 Ref=360,100

| Peak # | RetTime [min] | Type | Width [min] | Area [mAU*s] | Height [mAU] | Area %  |
|--------|---------------|------|-------------|--------------|--------------|---------|
| 1      | 10.835        | MM   | 0.2659      | 5350.61230   | 335.34192    | 98.9317 |
| 2      | 11.931        | MM   | 0.2770      | 57.77937     | 3.47645      | 1.0683  |



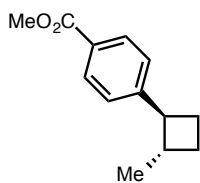

**Racemic 2h:**

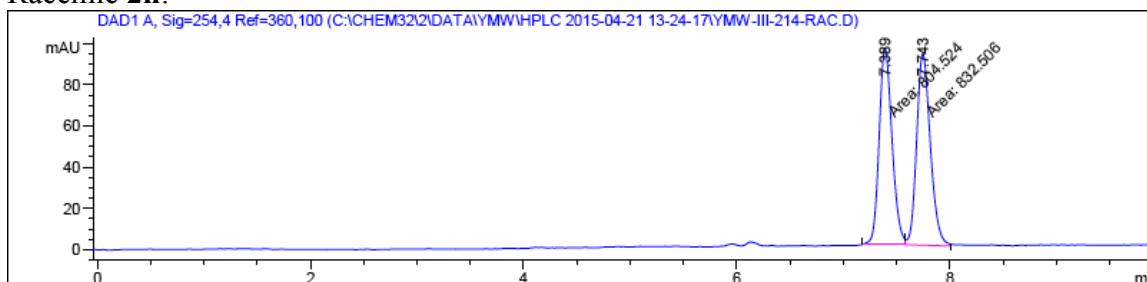

Signal 1: DAD1 A, Sig=254,4 Ref=360,100

| Peak # | RetTime [min] | Type | Width [min] | Area [mAU*s] | Height [mAU] | Area %  |
|--------|---------------|------|-------------|--------------|--------------|---------|
| 1      | 7.389         | MM   | 0.1400      | 804.52411    | 95.79789     | 49.1453 |
| 2      | 7.743         | MM   | 0.1489      | 832.50635    | 93.17208     | 50.8547 |

**Enantioenriched 2h:**

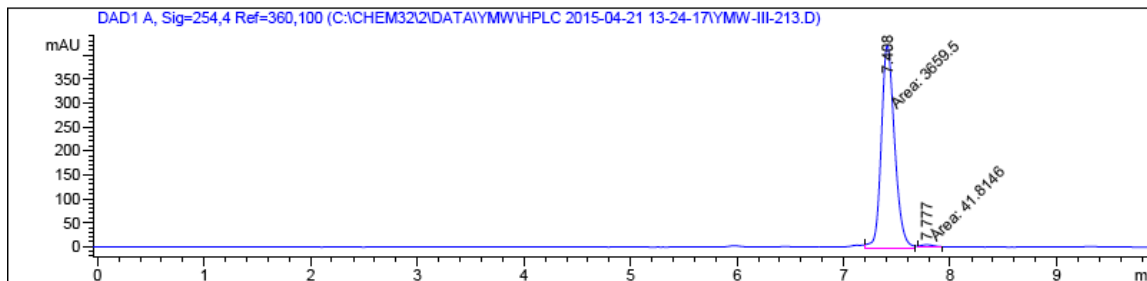

Signal 1: DAD1 A, Sig=254,4 Ref=360,100

| Peak # | RetTime [min] | Type | Width [min] | Area [mAU*s] | Height [mAU] | Area %  |
|--------|---------------|------|-------------|--------------|--------------|---------|
| 1      | 7.408         | MM   | 0.1440      | 3659.49951   | 423.68835    | 98.8703 |
| 2      | 7.777         | MM   | 0.1429      | 41.81459     | 4.87660      | 1.1297  |

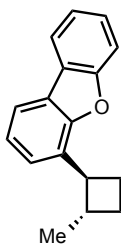

**Racemic 2i:**

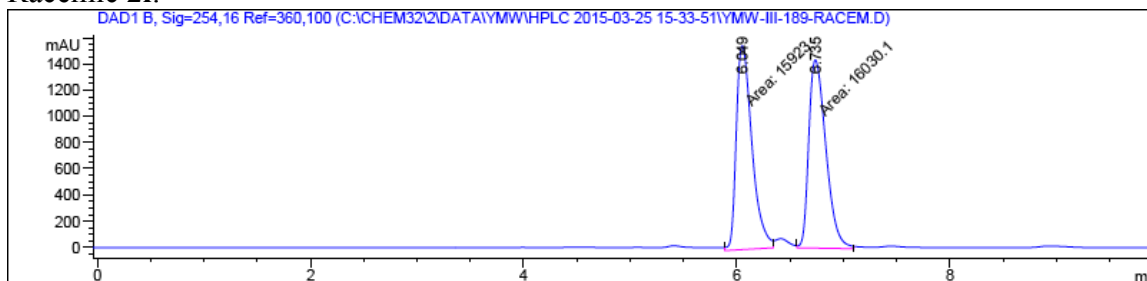

Signal 2: DAD1 B, Sig=254,16 Ref=360,100

| Peak # | RetTime [min] | Type | Width [min] | Area [mAU*s] | Height [mAU] | Area %  |
|--------|---------------|------|-------------|--------------|--------------|---------|
| 1      | 6.049         | MM   | 0.1706      | 1.59230e4    | 1555.91479   | 49.8324 |
| 2      | 6.735         | MM   | 0.1861      | 1.60301e4    | 1435.57251   | 50.1676 |

**Enantioenriched 2i:**

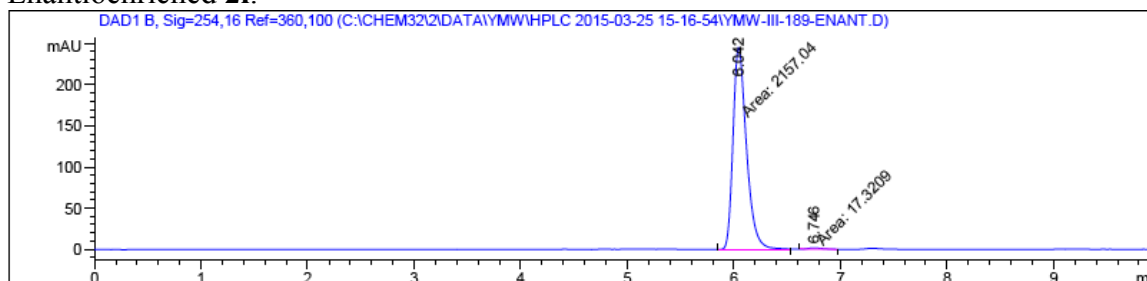

Signal 2: DAD1 B, Sig=254,16 Ref=360,100

| Peak # | RetTime [min] | Type | Width [min] | Area [mAU*s] | Height [mAU] | Area %  |
|--------|---------------|------|-------------|--------------|--------------|---------|
| 1      | 6.042         | MM   | 0.1465      | 2157.04419   | 245.44554    | 99.2034 |
| 2      | 6.746         | MM   | 0.1739      | 17.32091     | 1.65958      | 0.7966  |

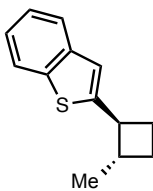

**Racemic 2j:**

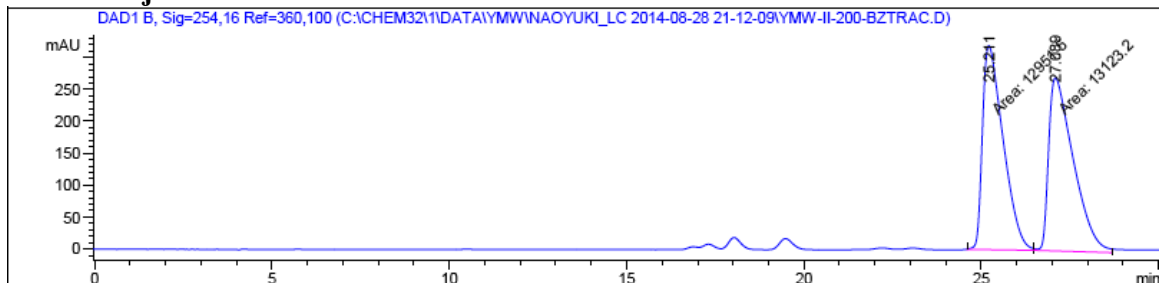

Signal 2: DAD1 B, Sig=254,16 Ref=360,100

| Peak # | RetTime [min] | Type | Width [min] | Area [mAU*s] | Height [mAU] | Area %  |
|--------|---------------|------|-------------|--------------|--------------|---------|
| 1      | 25.211        | MM   | 0.6756      | 1.29515e4    | 319.49527    | 49.6707 |
| 2      | 27.089        | MM   | 0.8061      | 1.31232e4    | 271.31689    | 50.3293 |

**Enantioenriched 2j:**

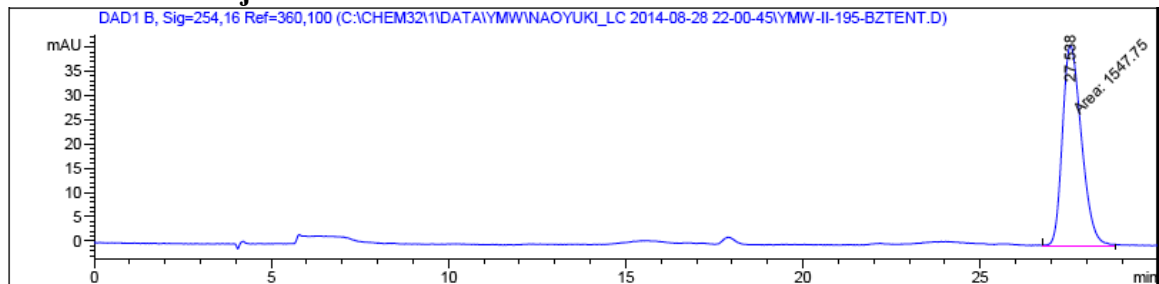

Signal 2: DAD1 B, Sig=254,16 Ref=360,100

| Peak # | RetTime [min] | Type | Width [min] | Area [mAU*s] | Height [mAU] | Area %   |
|--------|---------------|------|-------------|--------------|--------------|----------|
| 1      | 27.538        | MM   | 0.6241      | 1547.74841   | 41.32977     | 100.0000 |

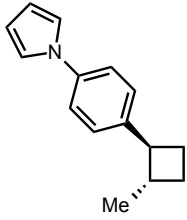

**Racemic 2k:**

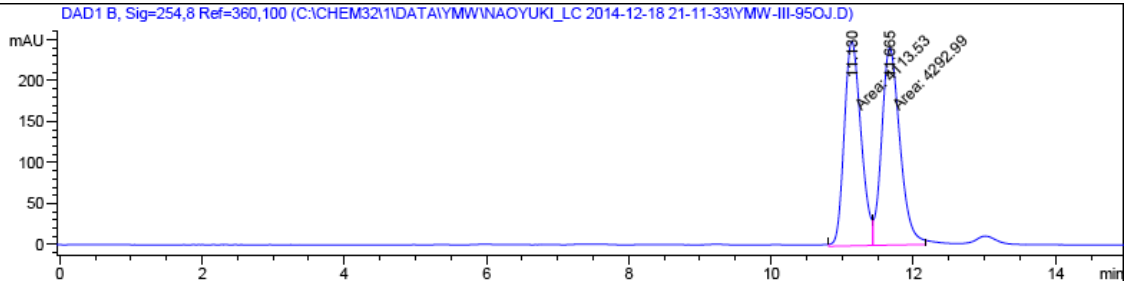

Signal 2: DAD1 B, Sig=254,8 Ref=360,100

| Peak # | RetTime [min] | Type | Width [min] | Area [mAU*s] | Height [mAU] | Area %  |
|--------|---------------|------|-------------|--------------|--------------|---------|
| 1      | 11.130        | MF   | 0.2744      | 4113.52686   | 249.86801    | 48.9326 |
| 2      | 11.665        | FM   | 0.2971      | 4292.98926   | 240.83388    | 51.0674 |

**Enantioenriched 2k:**

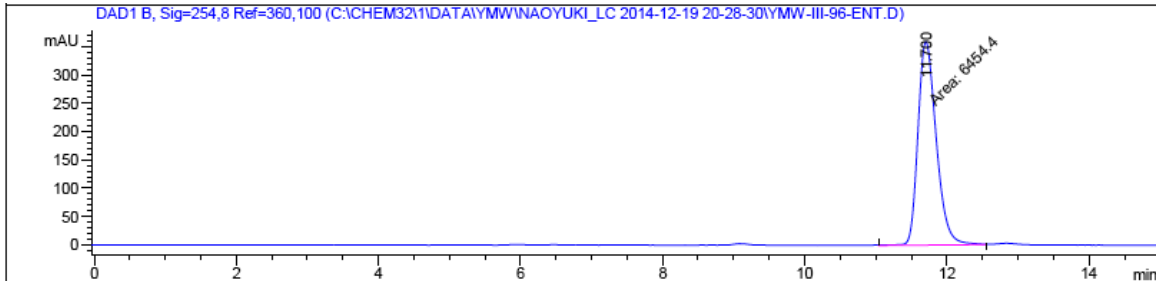

Signal 2: DAD1 B, Sig=254,8 Ref=360,100

| Peak # | RetTime [min] | Type | Width [min] | Area [mAU*s] | Height [mAU] | Area %   |
|--------|---------------|------|-------------|--------------|--------------|----------|
| 1      | 11.700        | MM   | 0.2987      | 6454.40234   | 360.11734    | 100.0000 |

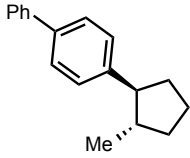

Racemic **2l**:

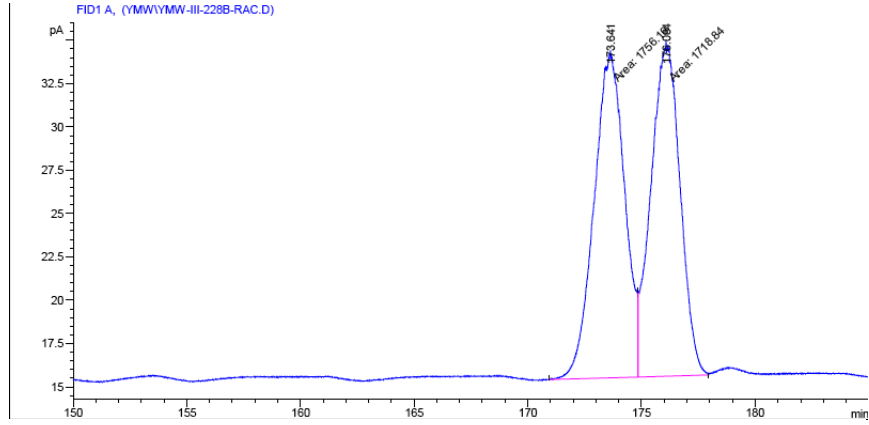

Signal 1: FID1 A,

| Peak # | RetTime [min] | Type | Width [min] | Area [pA*s] | Height [pA] | Area %   |
|--------|---------------|------|-------------|-------------|-------------|----------|
| 1      | 173.641       | MF   | 1.5522      | 1756.19092  | 18.85754    | 50.53742 |
| 2      | 176.084       | FM   | 1.4769      | 1718.84021  | 19.39677    | 49.46258 |

Enantioenriched **2l**:

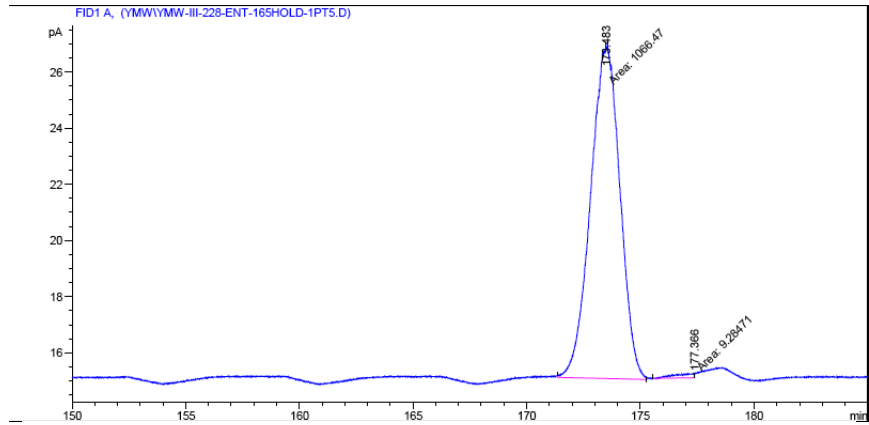

Signal 1: FID1 A,

| Peak # | RetTime [min] | Type | Width [min] | Area [pA*s] | Height [pA] | Area %   |
|--------|---------------|------|-------------|-------------|-------------|----------|
| 1      | 173.483       | MM   | 1.4843      | 1066.46802  | 11.97507    | 99.13691 |
| 2      | 177.366       | MM   | 1.0072      | 9.28471     | 1.53638e-1  | 0.86309  |

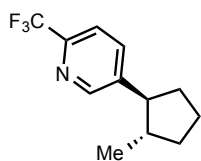

Racemic **2m**:

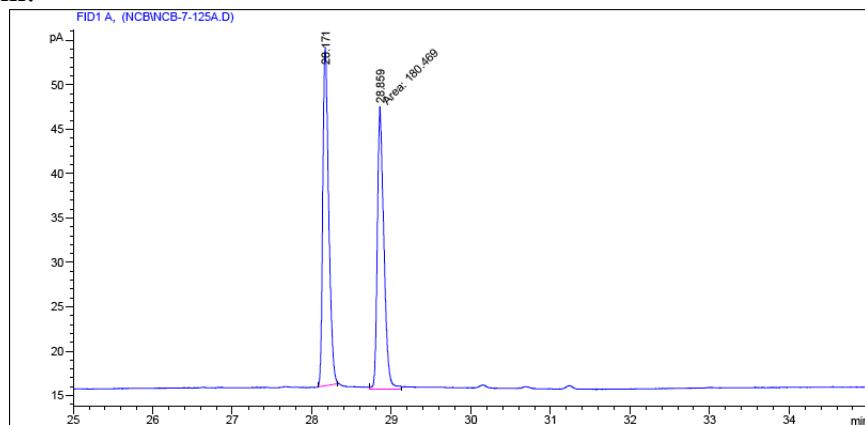

Signal 1: FID1 A,

| Peak # | RetTime [min] | Type | Width [min] | Area [pA*s] | Height [pA] | Area %   |
|--------|---------------|------|-------------|-------------|-------------|----------|
| 1      | 28.171        | BB   | 0.0752      | 196.78378   | 38.10927    | 52.16228 |
| 2      | 28.859        | MM   | 0.0946      | 180.46925   | 31.79614    | 47.83772 |

Enantioenriched **2m**:

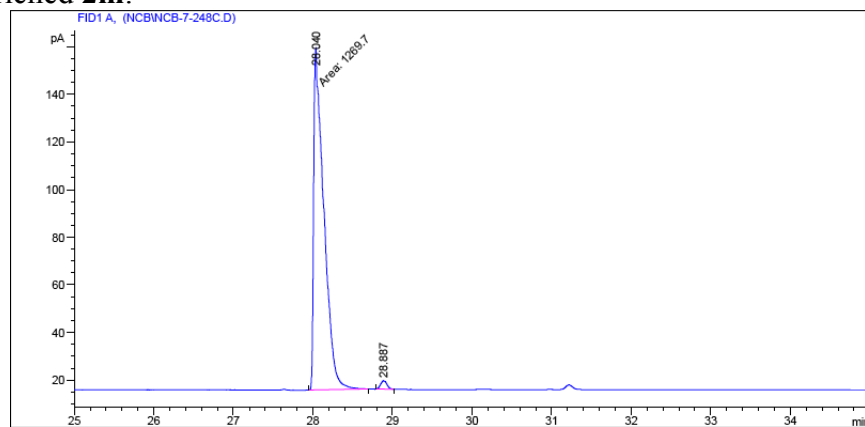

Signal 1: FID1 A,

| Peak # | RetTime [min] | Type | Width [min] | Area [pA*s] | Height [pA] | Area %   |
|--------|---------------|------|-------------|-------------|-------------|----------|
| 1      | 28.040        | MM   | 0.1473      | 1269.70105  | 143.65744   | 98.49776 |
| 2      | 28.887        | BB   | 0.0709      | 19.36490    | 3.53327     | 1.50224  |

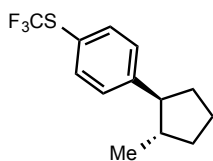

Racemic **2n**:

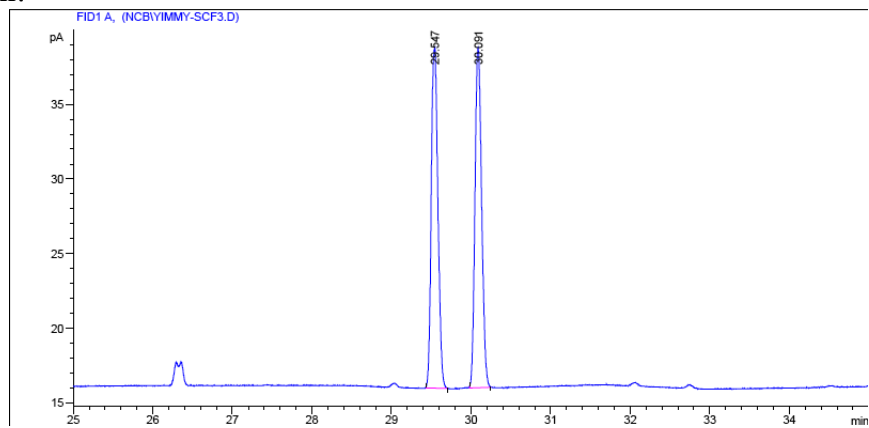

Signal 1: FID1 A,

| Peak # | RetTime [min] | Type | Width [min] | Area [pA*s] | Height [pA] | Area %   |
|--------|---------------|------|-------------|-------------|-------------|----------|
| 1      | 29.547        | BB   | 0.0766      | 132.48047   | 22.85815    | 49.98904 |
| 2      | 30.091        | BB   | 0.0848      | 132.53857   | 22.81592    | 50.01096 |

Enantioenriched **2n**:

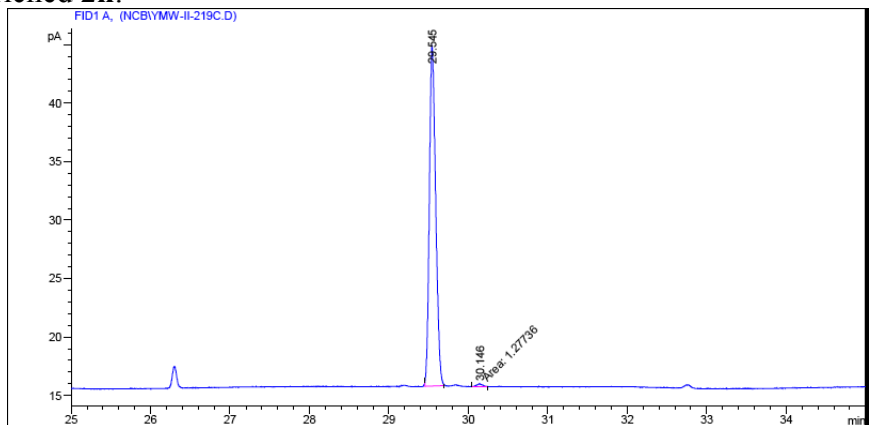

Signal 1: FID1 A,

| Peak # | RetTime [min] | Type | Width [min] | Area [pA*s] | Height [pA] | Area %   |
|--------|---------------|------|-------------|-------------|-------------|----------|
| 1      | 29.545        | BB   | 0.0786      | 160.68417   | 29.02345    | 99.21132 |
| 2      | 30.146        | MM   | 0.0897      | 1.27736     | 2.37379e-1  | 0.78868  |

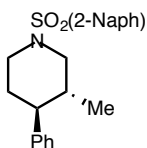

**Racemic 2o:**

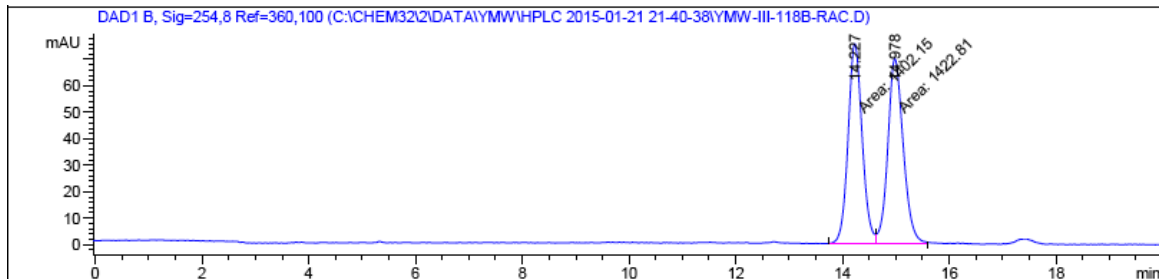

Signal 2: DAD1 B, Sig=254,8 Ref=360,100

| Peak # | RetTime [min] | Type | Width [min] | Area [mAU*s] | Height [mAU] | Area %  |
|--------|---------------|------|-------------|--------------|--------------|---------|
| 1      | 14.227        | MF   | 0.3081      | 1402.14856   | 75.86118     | 49.6342 |
| 2      | 14.978        | FM   | 0.3378      | 1422.81482   | 70.19015     | 50.3658 |

**Enantioenriched 2o:**

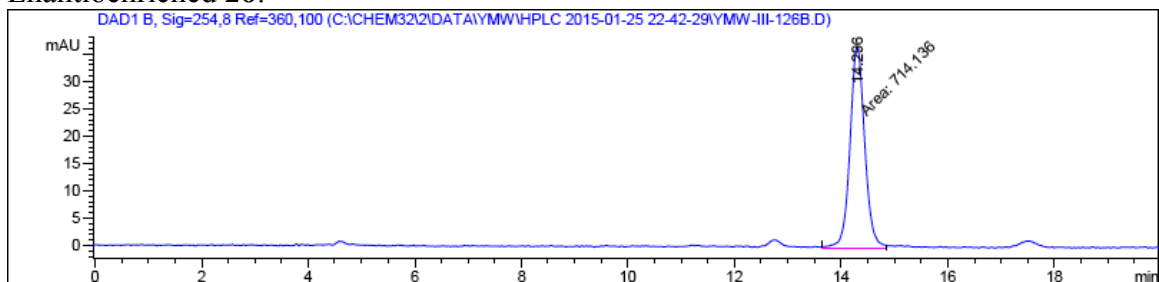

Signal 2: DAD1 B, Sig=254,8 Ref=360,100

| Peak # | RetTime [min] | Type | Width [min] | Area [mAU*s] | Height [mAU] | Area %   |
|--------|---------------|------|-------------|--------------|--------------|----------|
| 1      | 14.296        | MM   | 0.3225      | 714.13617    | 36.90207     | 100.0000 |



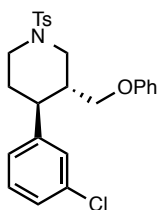

**Racemic 2p:**

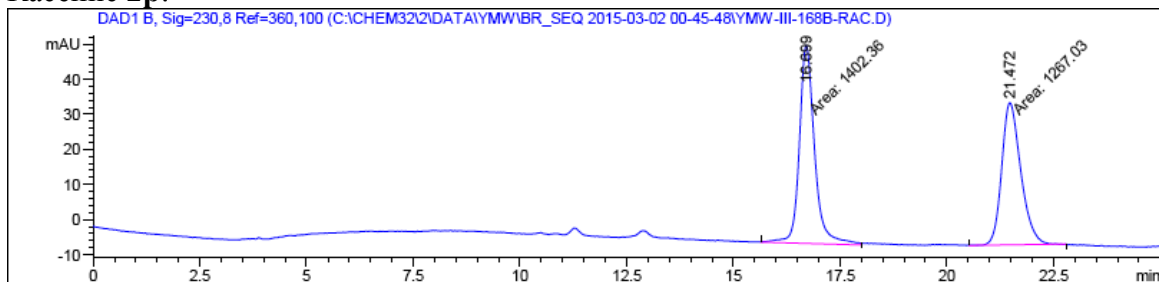

Signal 2: DAD1 B, Sig=230,8 Ref=360,100

| Peak # | RetTime [min] | Type | Width [min] | Area [mAU*s] | Height [mAU] | Area %  |
|--------|---------------|------|-------------|--------------|--------------|---------|
| 1      | 16.699        | MM   | 0.4142      | 1402.36401   | 56.43433     | 52.5349 |
| 2      | 21.472        | MM   | 0.5203      | 1267.02930   | 40.58829     | 47.4651 |

**Enantioenriched 2p:**

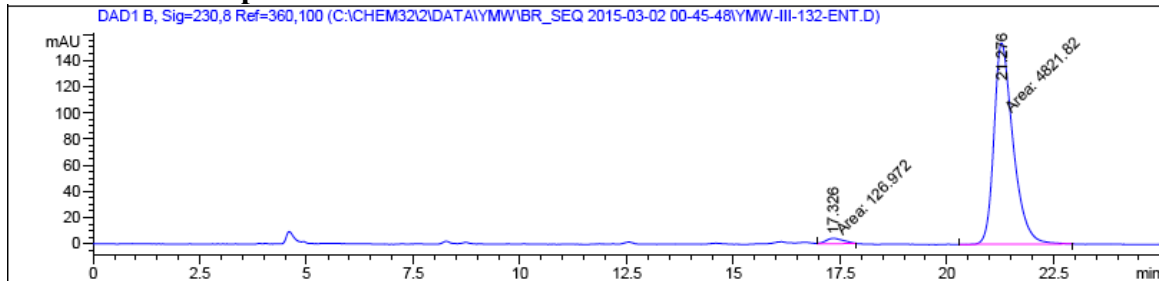

Signal 2: DAD1 B, Sig=230,8 Ref=360,100

| Peak # | RetTime [min] | Type | Width [min] | Area [mAU*s] | Height [mAU] | Area %  |
|--------|---------------|------|-------------|--------------|--------------|---------|
| 1      | 17.326        | FM   | 0.4993      | 126.97158    | 4.23867      | 2.5657  |
| 2      | 21.276        | MM   | 0.5226      | 4821.81738   | 153.78175    | 97.4343 |

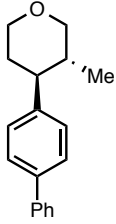

**Racemic 2q:**

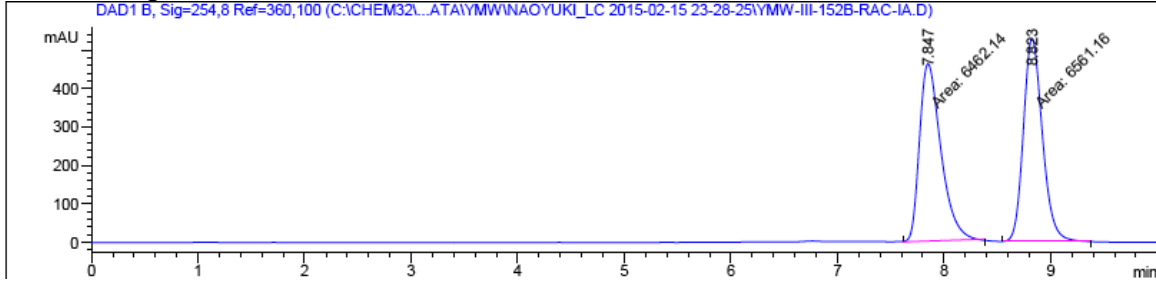

Signal 2: DAD1 B, Sig=254,8 Ref=360,100

| Peak # | RetTime [min] | Type | Width [min] | Area [mAU*s] | Height [mAU] | Area %  |
|--------|---------------|------|-------------|--------------|--------------|---------|
| 1      | 7.847         | MM   | 0.2328      | 6462.14160   | 462.65054    | 49.6198 |
| 2      | 8.823         | MM   | 0.2066      | 6561.16162   | 529.38330    | 50.3802 |

**Enantioenriched 2q:**

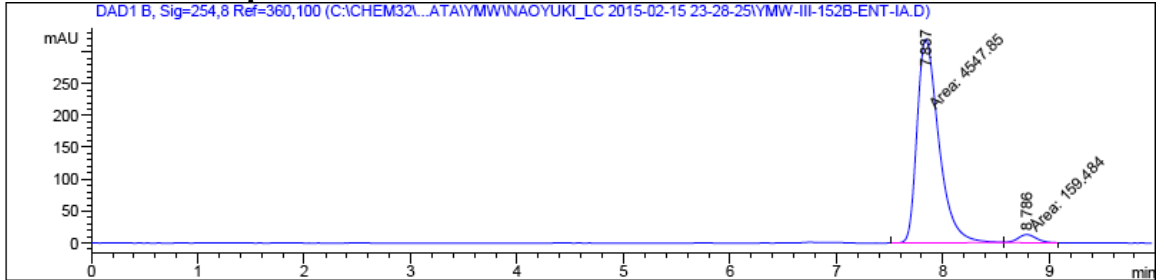

Signal 2: DAD1 B, Sig=254,8 Ref=360,100

| Peak # | RetTime [min] | Type | Width [min] | Area [mAU*s] | Height [mAU] | Area %  |
|--------|---------------|------|-------------|--------------|--------------|---------|
| 1      | 7.837         | MM   | 0.2369      | 4547.85254   | 319.94186    | 96.6120 |
| 2      | 8.786         | MM   | 0.2073      | 159.48389    | 12.82190     | 3.3880  |

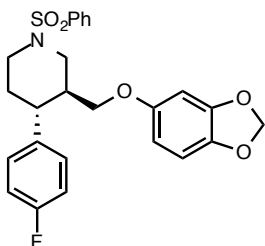

Racemic **2r**:

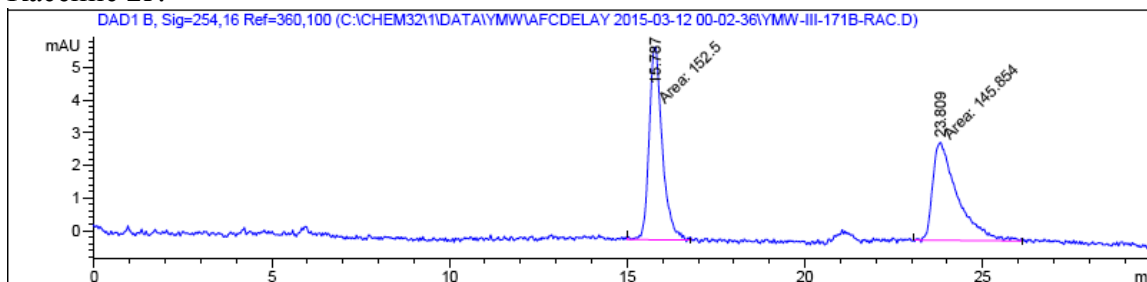

Signal 2: DAD1 B, Sig=254,16 Ref=360,100

| Peak # | RetTime [min] | Type | Width [min] | Area [mAU*s] | Height [mAU] | Area %  |
|--------|---------------|------|-------------|--------------|--------------|---------|
| 1      | 15.787        | MM   | 0.4307      | 152.50032    | 5.90180      | 51.1139 |
| 2      | 23.809        | MM   | 0.8104      | 145.85382    | 2.99974      | 48.8861 |

Enantioenriched **2r**:

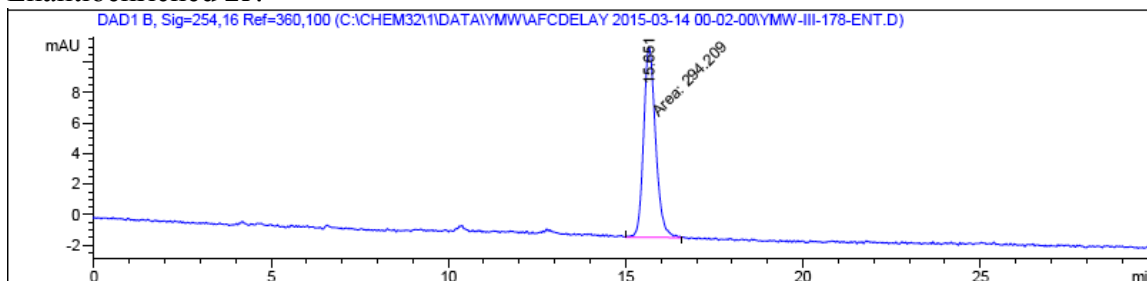

Signal 2: DAD1 B, Sig=254,16 Ref=360,100

| Peak # | RetTime [min] | Type | Width [min] | Area [mAU*s] | Height [mAU] | Area %   |
|--------|---------------|------|-------------|--------------|--------------|----------|
| 1      | 15.651        | MM   | 0.3927      | 294.20929    | 12.48640     | 100.0000 |

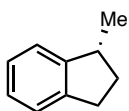

Racemic **4a**:

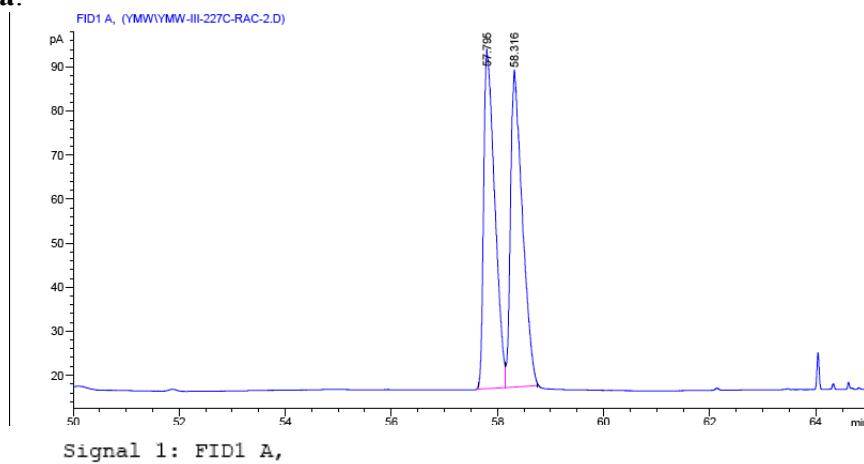

Enantioenriched **4a**:

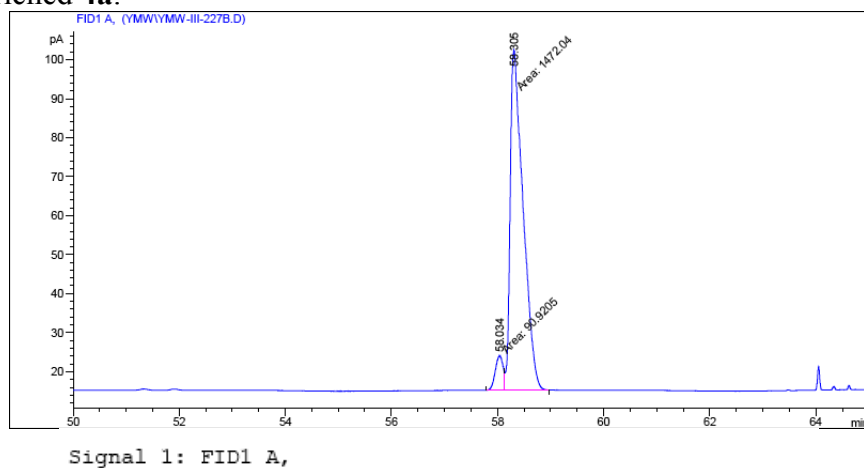

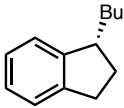

**Racemic 4b:**

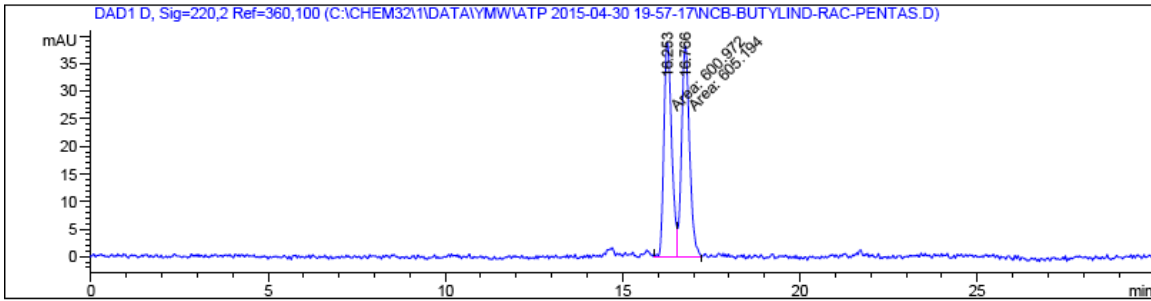

Signal 4: DAD1 D, Sig=220,2 Ref=360,100

| Peak # | RetTime [min] | Type | Width [min] | Area [mAU*s] | Height [mAU] | Area %  |
|--------|---------------|------|-------------|--------------|--------------|---------|
| 1      | 16.253        | MF   | 0.2568      | 600.97211    | 39.00263     | 49.8250 |
| 2      | 16.766        | FM   | 0.2635      | 605.19354    | 38.28640     | 50.1750 |

**Enantioenriched 4b:**

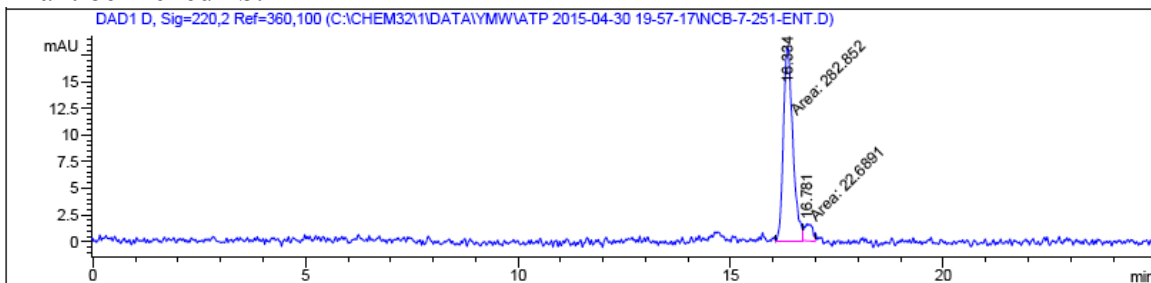

Signal 4: DAD1 D, Sig=220,2 Ref=360,100

| Peak # | RetTime [min] | Type | Width [min] | Area [mAU*s] | Height [mAU] | Area %  |
|--------|---------------|------|-------------|--------------|--------------|---------|
| 1      | 16.334        | MF   | 0.2569      | 282.85226    | 18.34714     | 92.5741 |
| 2      | 16.781        | MM   | 0.2351      | 22.68913     | 1.60876      | 7.4259  |

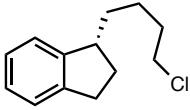

**Racemic 4c:**

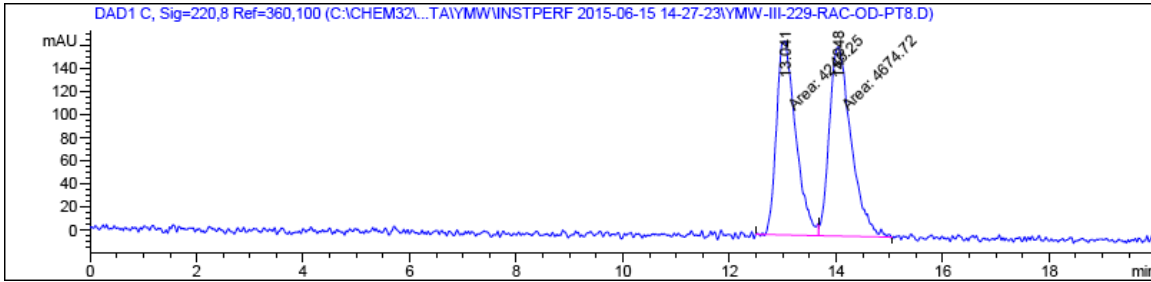

Signal 3: DAD1 C, Sig=220,8 Ref=360,100

| Peak # | RetTime [min] | Type | Width [min] | Area [mAU*s] | Height [mAU] | Area %  |
|--------|---------------|------|-------------|--------------|--------------|---------|
| 1      | 13.041        | MF   | 0.4208      | 4246.25488   | 168.17352    | 47.5986 |
| 2      | 14.048        | FM   | 0.4758      | 4674.71582   | 163.73685    | 52.4014 |

**Enantioenriched 4c:**

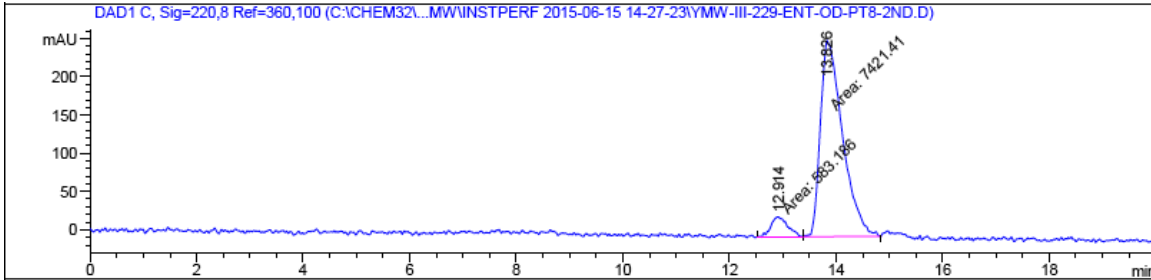

Signal 3: DAD1 C, Sig=220,8 Ref=360,100

| Peak # | RetTime [min] | Type | Width [min] | Area [mAU*s] | Height [mAU] | Area %  |
|--------|---------------|------|-------------|--------------|--------------|---------|
| 1      | 12.914        | MF   | 0.3710      | 583.18622    | 26.19545     | 7.2856  |
| 2      | 13.826        | FM   | 0.4822      | 7421.40820   | 256.50671    | 92.7144 |
